# Supplementary material for: Synthesis of 6-Membered-Ring Fused Thiazine-Dicarboxylates and Thiazole-Pyrimidines via One-Pot Three-Component Reactions
Source: MDPI journal article supplement (doi:10.3390/molecules26185493), 2021-09-10
Supplement: s1 [file s1]

# Synthesis of 6-membered-ring fused thiazine-dicarboxylates and thiazole-pyrimidines *via* one-pot three-component reactions

Reagan L. Mohlala<sup>1,2</sup>; E. Mabel Coyanis<sup>1\*</sup>; Muhammad Q. Fish<sup>1</sup>, Manuel A. Fernandes<sup>2</sup>; Moira L. Bode<sup>2\*</sup>

<sup>1</sup> Advanced Materials Division, Mintek, Private Bag X3015, Randburg, 2125, South Africa

<sup>2</sup> Molecular Sciences Institute, School of Chemistry, University of the Witwatersrand, PO Wits, 2050, South Africa;

\*Correspondence: mabelc@mintek.co.za (E.M. Coyanis); Moira.Bode@wits.ac.za (M.L. Bode)

## Table of Contents

### 1. Biological Evaluation Results

### 2. Biological Evaluation Methods

### 3. NMR and Mass Spectra for Compounds 9c/d, 10a–u, 13a–j, 19a/b, 20 and 8

### 4. CheckCIF Files for X-Ray Crystallography—Compounds 8, 13a, 13b and 13d

## 1. Biological evaluation results

The synthesized pyrimidines and their analogues **8**, **13**, **19** and **20** were evaluated for toxicity in the MT-4 cell line at 100  $\mu$ M. MT-4 cells were originally isolated from an adult Japanese patient with acute lymphoblastic leukemia [1]. By determining the cytotoxicity of the compounds, it shows that they have the potential to kill cancer cells, as most of the compounds have values up to 7.3  $\mu$ M. Auranofin [2] was used as a cytotoxic control compound, starting at a concentration of 100  $\mu$ M. DMSO was used as a background control. Most of the compounds were considered as relatively toxic, with CC50 values below 100  $\mu$ M. Further biological studies using a range of cancer cell lines and primary cells would need to be performed to determine if the observed toxicity is directed to particular cancer types or if it is stochastic. On the other hand, six of the thiazole-pyrimidine derivatives and analogues, namely **13a**, **13j**, **13h**, **13o**, **19a/b** and **20**, were found to have CC50 values above 200  $\mu$ M, as shown in Table S1, whilst at least compounds 10c, 10m and 13e were found to have CC50 values of above 100  $\mu$ M. These compounds, namely **3a**, **13j**, **13h**, **13o**, **19a/b** and **20**, can be considered to be relatively nontoxic and were subjected to antiviral activity evaluation. The antiviral activities were performed in infected MT4 cells, using dolutegravir and raltegravir as control compounds. The tests were carried out in a cell-based assay, and each compound was analyzed at a single dose of 100  $\mu$ M. Based on the outcome, none of these compounds showed any significant activity.

**Table S1:** CC<sub>50</sub> values and antiviral percentage inhibition of synthesised thiazine derivatives 10a-u, 13a-j, 19, 20 and 8

| Compound | CC <sub>50</sub> (μM) | % HIV Antiviral inhibition (in infected MT4 cells) |
|----------|-----------------------|----------------------------------------------------|
| 10a      | 7.3                   |                                                    |
| 10b      | 12                    |                                                    |
| 10c      | 102                   |                                                    |
| 10d      | 51                    |                                                    |
| 10e      | 16                    |                                                    |
| 10f      | 33                    |                                                    |
| 10g      | 33                    |                                                    |
| 10h      | 51                    |                                                    |
| 10i      | 49                    |                                                    |
| 10j      | 80                    |                                                    |
| 10k      | 25                    |                                                    |
| 10l      | 20                    |                                                    |
| 10m      | 120                   |                                                    |
| 10n      | 17                    |                                                    |
| 10o      | 21                    |                                                    |
| 10p      | 16                    |                                                    |
| 10q      | 39                    |                                                    |
| 10r      | 26                    |                                                    |
| 10s      | 57                    |                                                    |
| 10t      | 33                    |                                                    |
| 10u      | 27                    |                                                    |
| 13a      | > 200                 | -7.18                                              |
| 13b      | 59                    |                                                    |

|            |       |       |
|------------|-------|-------|
| <b>13c</b> | 17    |       |
| <b>13d</b> | 101   |       |
| <b>13e</b> | > 200 | 0.98  |
| <b>13f</b> | 36    |       |
| <b>13g</b> | > 200 | -2.63 |
| <b>13h</b> | 14    |       |
| <b>13i</b> | 17    |       |
| <b>13j</b> | > 200 | -9.18 |
| <b>19a</b> | > 200 | -4.83 |
| <b>19b</b> | > 200 | 1.19  |
| <b>20</b>  | > 200 | 0.55  |
| <b>8</b>   | 27    | -7.18 |

CC<sub>50</sub> - concentration of compounds that causes 50% reduction of cell growth

Most of the synthesised thiazines **10** and pyrimidines **13** were shown to have toxicity towards a leukaemia cell line used in this study, with the most toxic being **10a**, indicating potential anticancer effects. Future work will be directed towards determining if this toxicity is specific or stochastic.

## 2. Biological evaluation methods

### 2.1 Cytotoxicity

The day of cytotoxicity testing, MT-4 cells (obtained through the NIH AIDS Reagent Program, Division of AIDS, NIAID, NIH: MT-4 catalogue number 120) were counted and seeded at  $5 \times 10^4$  cells per well. A total of 100  $\mu\text{L}$  of cells was added to each well of 96-well cell culture plates (TTP) for testing. The volume in the last row of wells of each plate was further increased to 197  $\mu\text{L}$  of media containing MT-4 cells. The plate was placed into the incubator to equilibrate to 37 °C and 5%  $\text{CO}_2$ . Test compounds were prepared in plate format, and each compound was at 25 mM stock concentration in DMSO. A total of 3.2  $\mu\text{L}$  compound was added to the final row of wells containing 197  $\mu\text{L}$  cells and mixed to ensure the solution was homogeneous with the cells. A two-fold serial dilution of an eight-times series was performed, and the final 100  $\mu\text{L}$  was discarded. The plate was placed at 37 °C and 5%  $\text{CO}_2$  for 5 days. On the fifth day, the cell viability was assessed by using the Cell Titre 96® Aqueous One Solution Cell Proliferation assay (Promega) as per the manufacturer's instructions. Briefly, 20  $\mu\text{L}$  of MTS solution was added to each well and incubated at 37 °C for 4 hours. The absorbance of the plates was then read at 490 nm on a Spectra Max Spectrophotometer (Molecular Devices). The data analysis was completed on Origin 8.1 with the log value of the compounds molar concentration plotted against the percentage cell viability determined by the absorbance level by sigmoidal fitting. From the curve, a half maximal cytotoxicity CC50 for compounds was determined. Auranofin was used as a cytotoxic control compound, starting at 100  $\mu\text{M}$ , across a two-fold serial dilution of eight dilution series. DMSO was used as a background control and two-fold serially diluted from 1.5%.

### 2.2 Antiviral procedure

An HIV-1 chronically infected ACH-2 clone was obtained through the NIH HIV Reagent Program, Division of AIDS, NIAID, NIH: ACH-2 Cells, ARP-349, contributed by Dr. Thomas Folks. The cells were grown and maintained in RPMI 1640 (Sigma) supplemented with 10 mM HEPES, 2 mM L-glutamine, non-essential amino acids and 10% heat inactivated fetal bovine serum at 37 °C and 5%  $\text{CO}_2$ . The ACH-2 cells were activated by 1  $\mu\text{M}$  phorbol myristate acetate (PMA) [3]. Supernatants were harvested at 48 h by centrifugation at 4000 x g and stored at -80 °C until use. MT4 cells were grown and maintained in RPMI (Gibco) supplemented with 2 mM L-glutamine, non-essential amino acids and 10% heat-inactivated fetal bovine serum at 37 °C and 5%  $\text{CO}_2$ . Harvested supernatant containing HIV-1 was added to MT4 cells, and viral absorption was allowed for 24 h, similar to the method by Rosenwirth and co-workers [4]. After viral absorption, the cells were washed once with fresh media, a sample was taken and HIV1 infection was allowed to develop. Seven days after infection, MT4 supernatant samples were tested for the presence of p24 antigen, using the bioelisa HIV-1+2 Ag/Ab kit (biokit) as per the manufacturer's instructions. After HIV-1 infection was confirmed, supernatant samples were isolated by centrifugation at 4000 x g and immediately used to infect  $1 \times 10^5$  cells/ml of MT4 cells. The virus was allowed to adsorb, and 24 h later, the cells were washed with fresh media and, 100  $\mu\text{L}$  of cells,  $1 \times 10^4$  cells, was

aliquoted into a round-bottom 96-well plate (TPP). Uninfected cells were also prepared. A day 1, a sample was taken and stored at -80 °C until final testing. Compounds were diluted in fresh media to 200  $\mu$ M concentrations, and 100  $\mu$ L was added to each test well; the final concentration of compounds was 100  $\mu$ M. Control compounds include dolutegravir and raltegravir and were used at 10  $\mu$ M each; blank wells contained equal volumes of DMSO. Upper and lower asymptotes were determined by untreated MT4 cells either infected with HIV (100%) or not infected with HIV (0%). Four days after infection, p24 presence was determined by using the bioelisa HIV-1+2 Ag/Ab kit as per the manufacturer's instructions. The data were used to determine if the selected concentration of compounds would reduce the amount of p24 and thereby indicate a reduction in HIV infectivity.

### 3. NMR and Mass Spectra

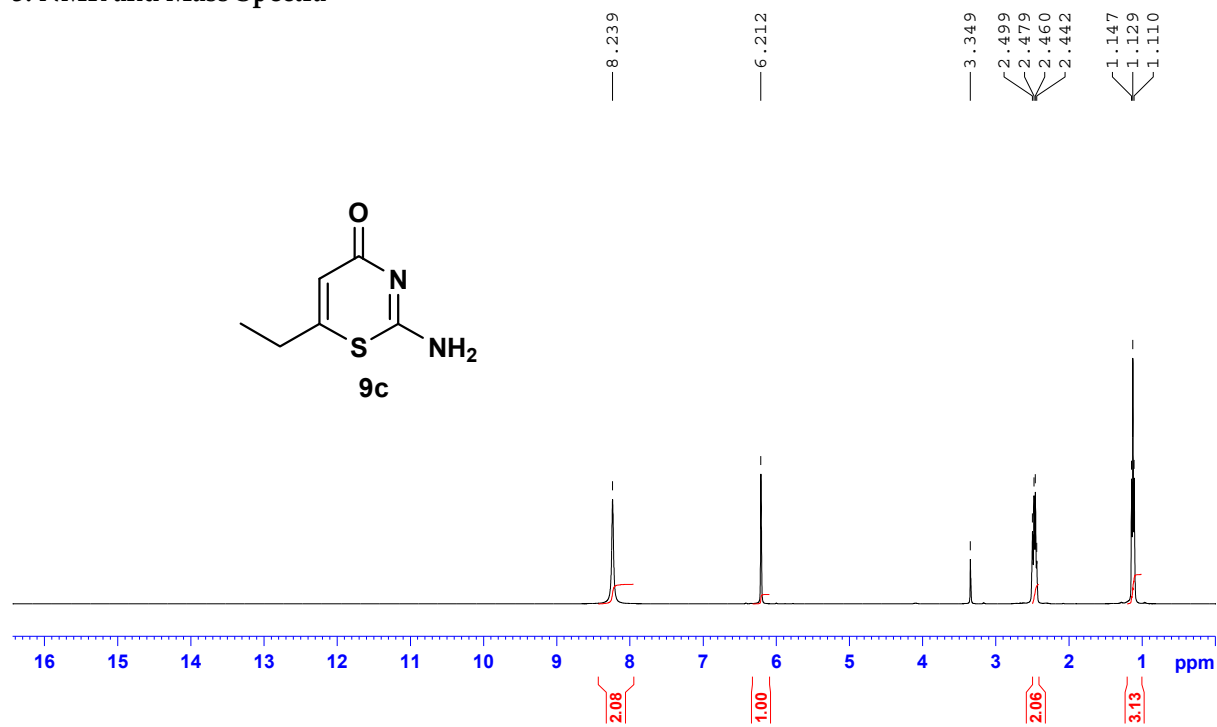

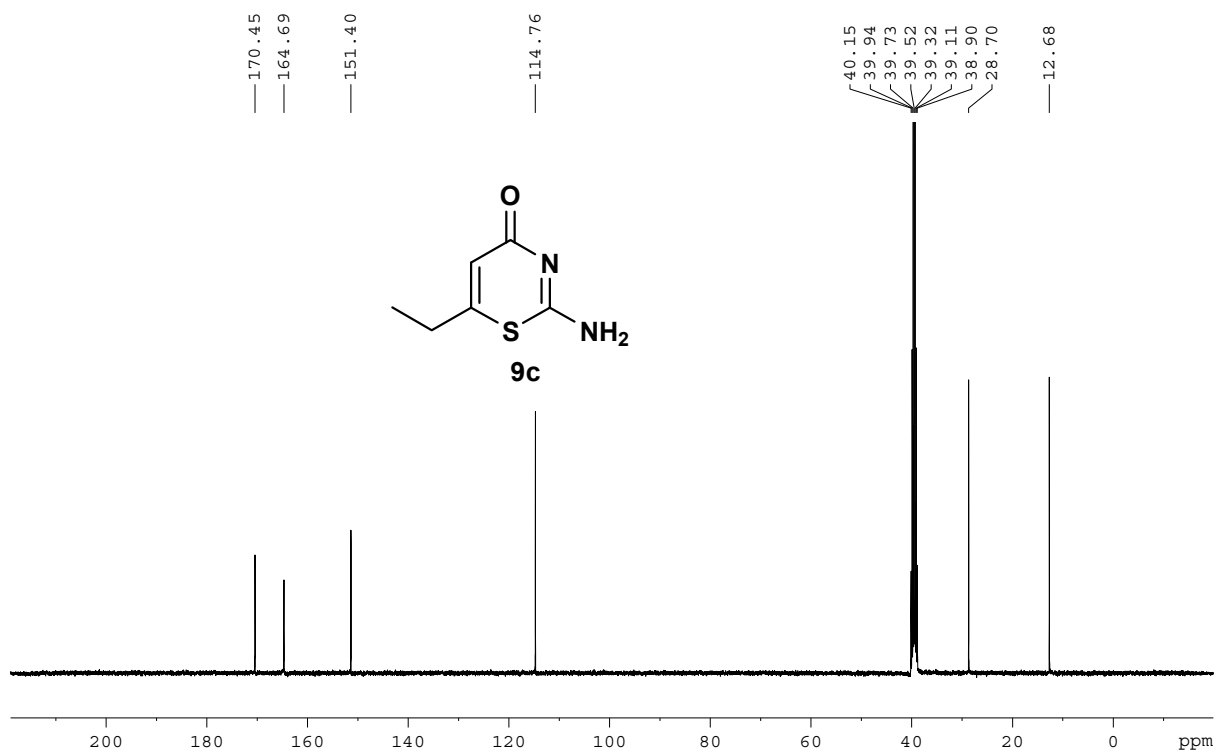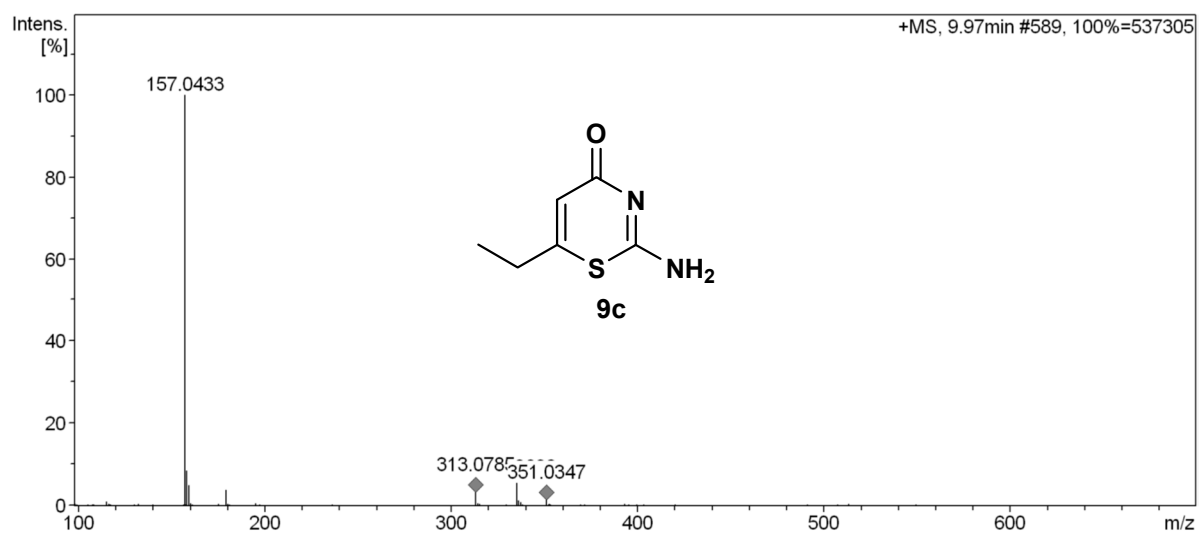

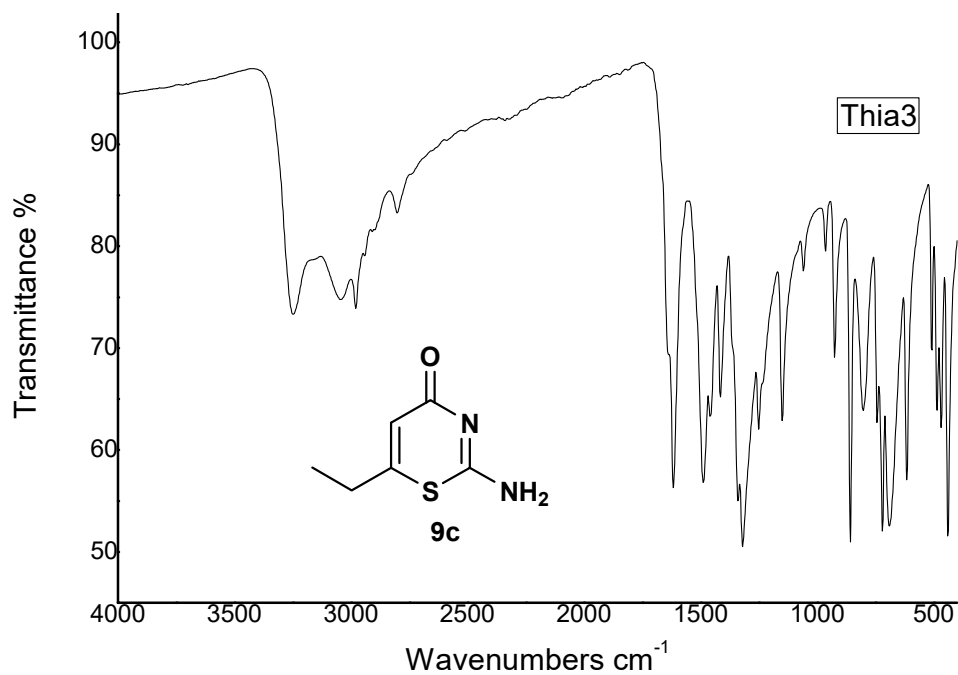

8.238

6.207

3.349  
2.499  
2.451  
2.432  
2.414  
1.588  
1.569  
1.551  
1.533  
1.514  
1.497  
0.901

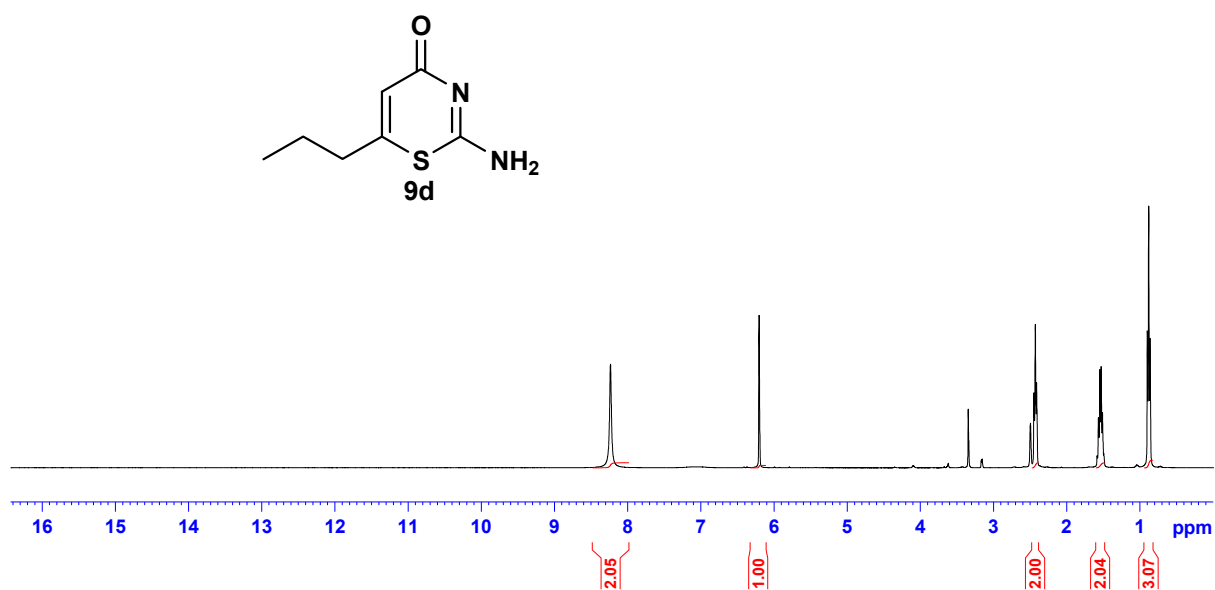



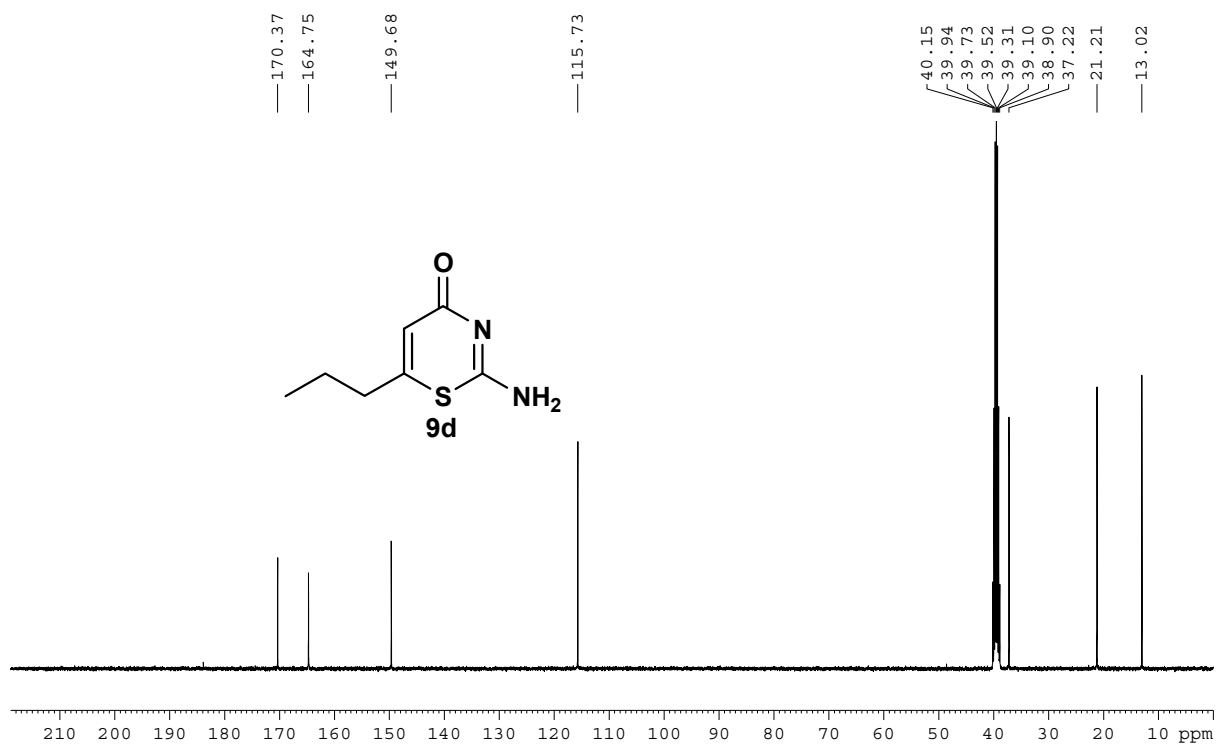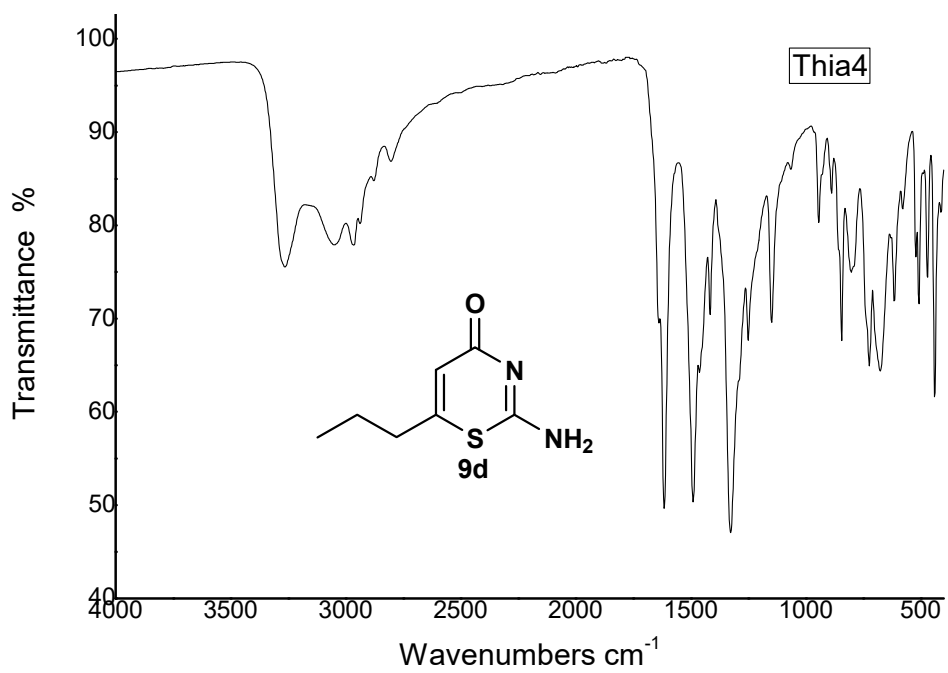

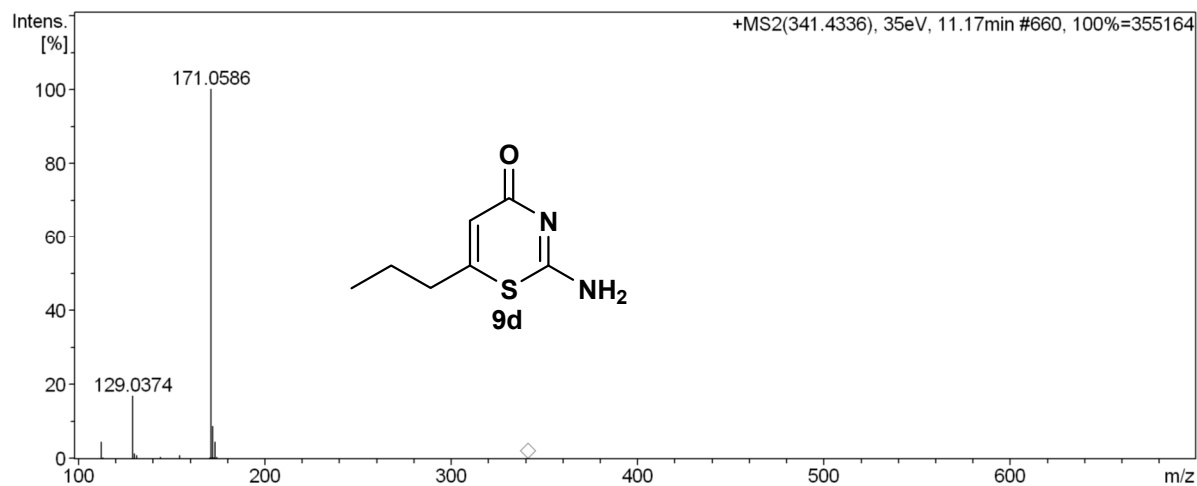

#### 4-Oxo-4,6-dihydropyrimido[2,1-b][1,3]thiazine-6,7-dicarboxylate derivatives

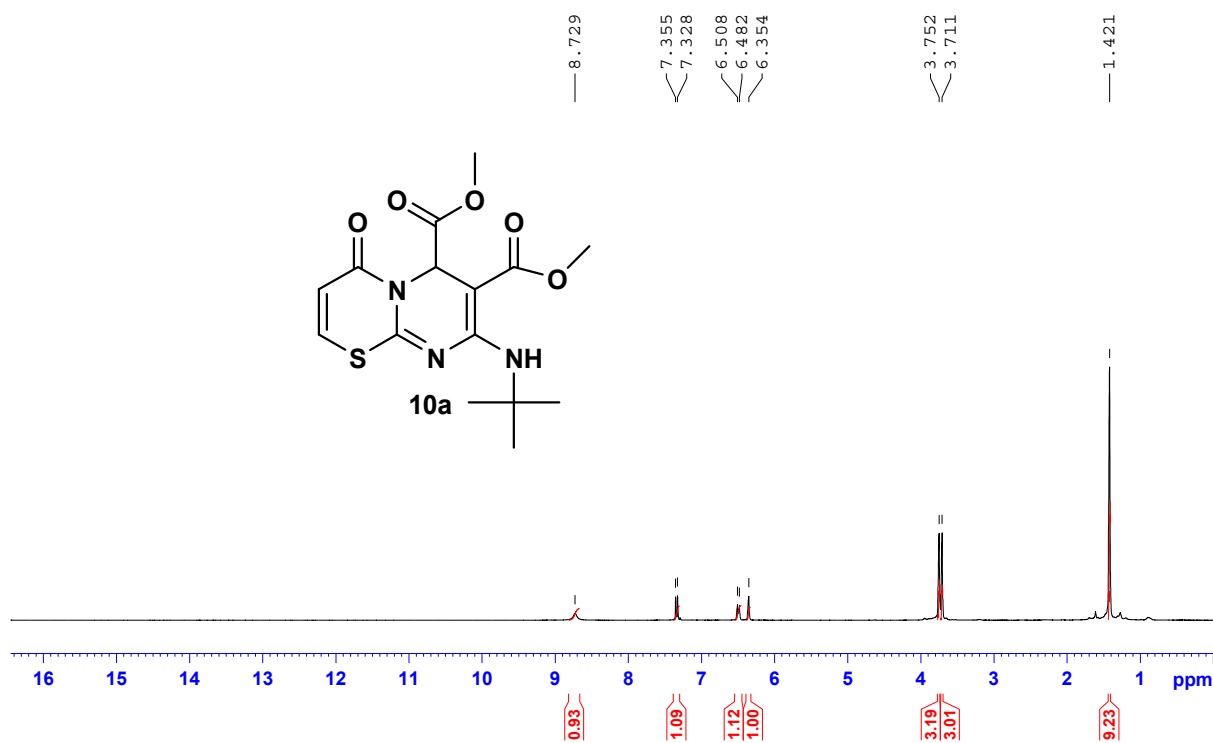

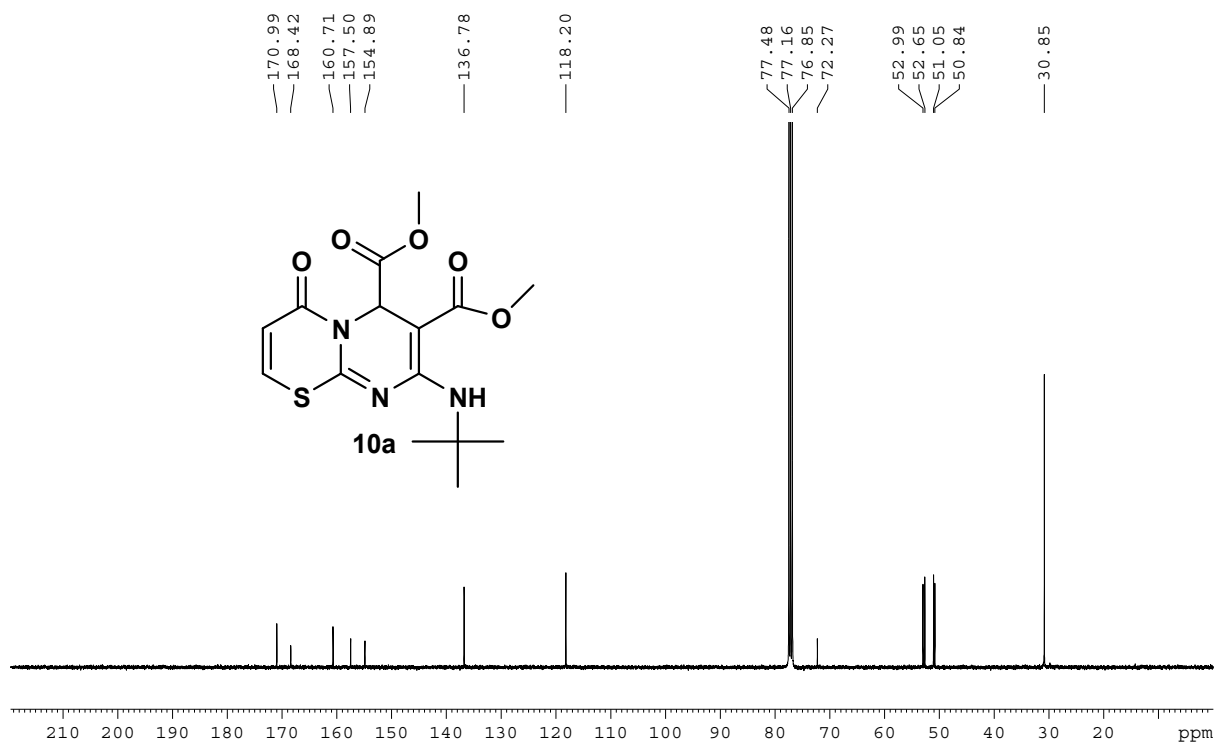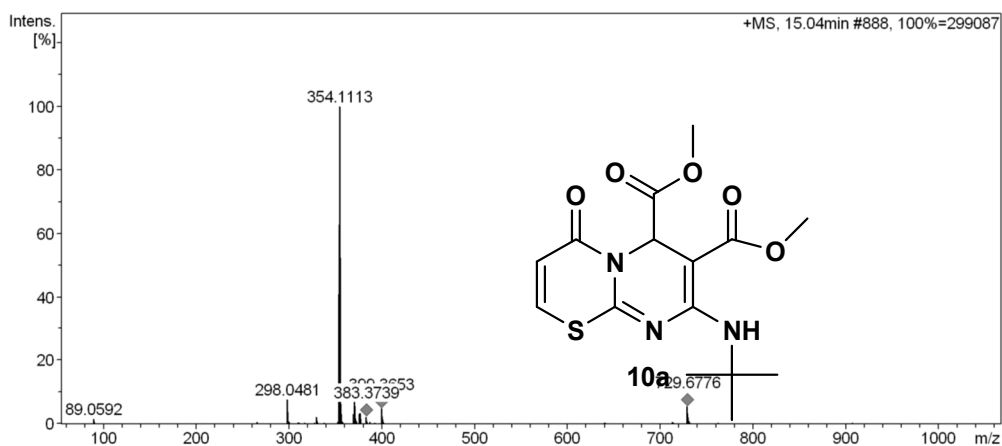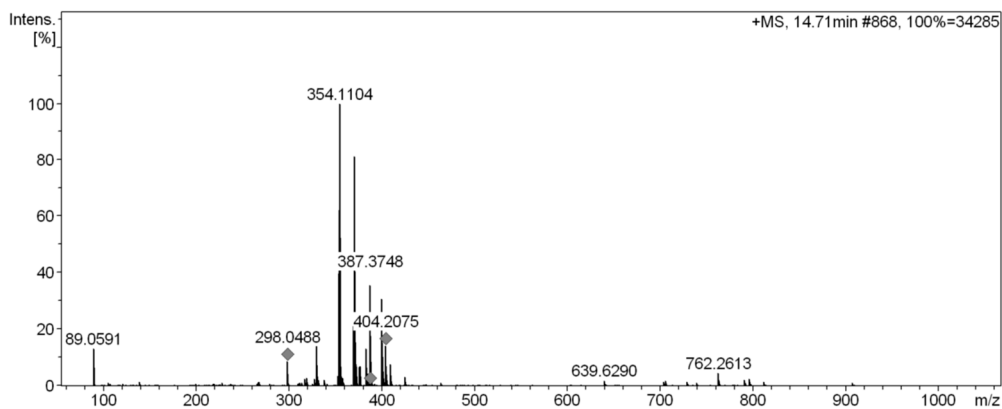

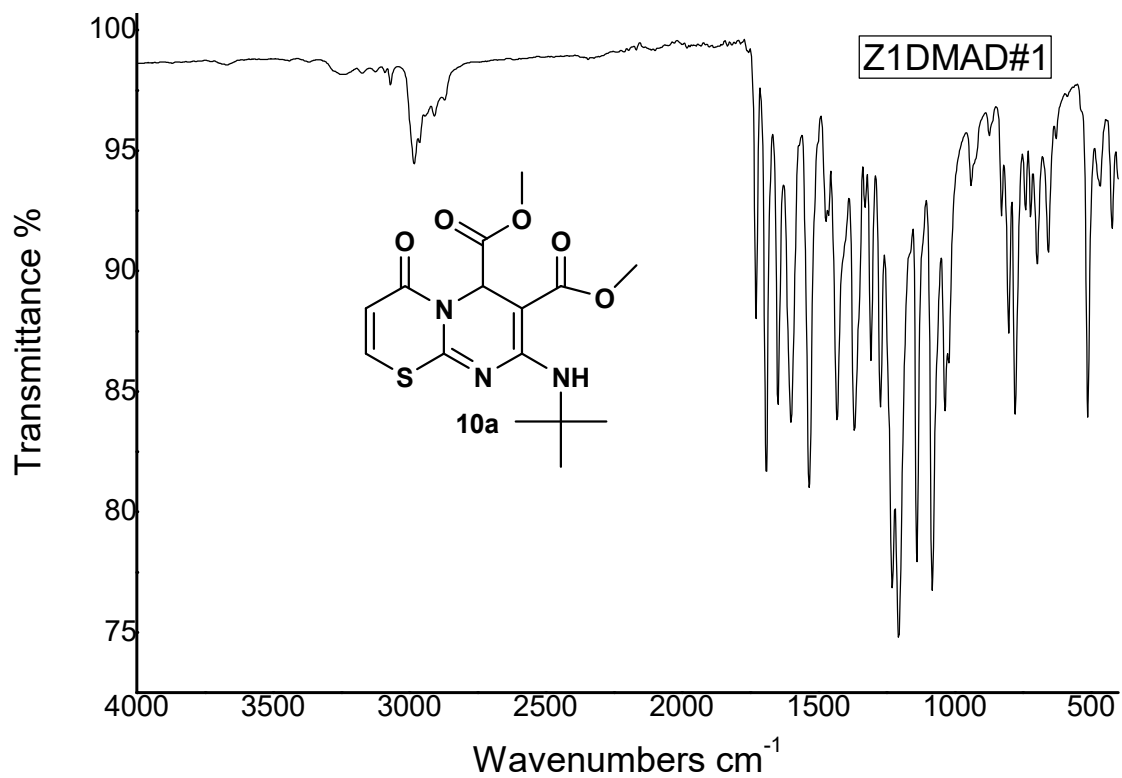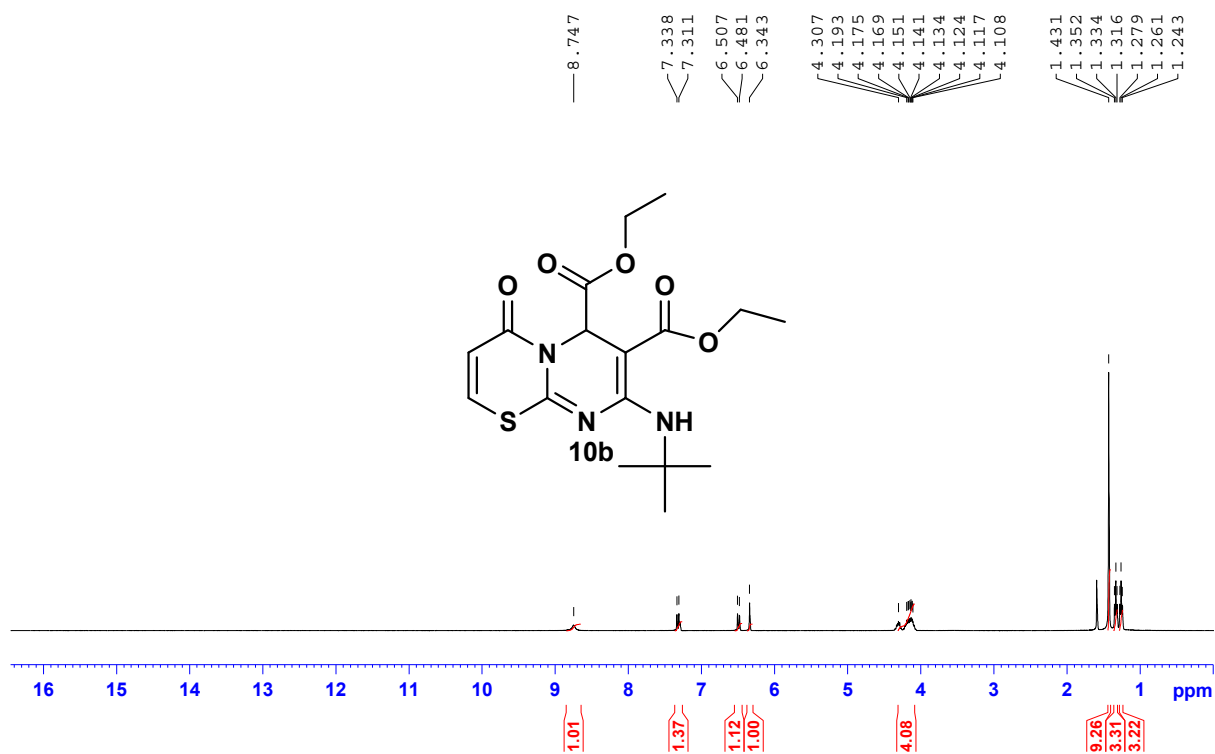

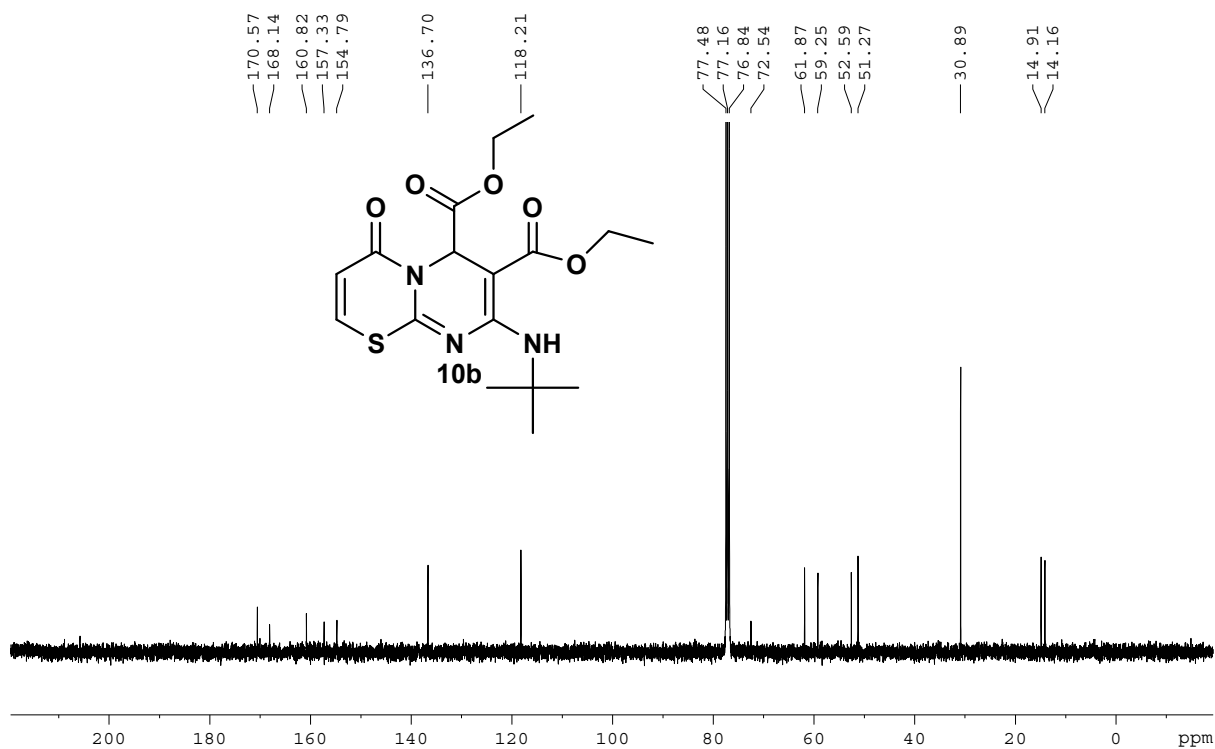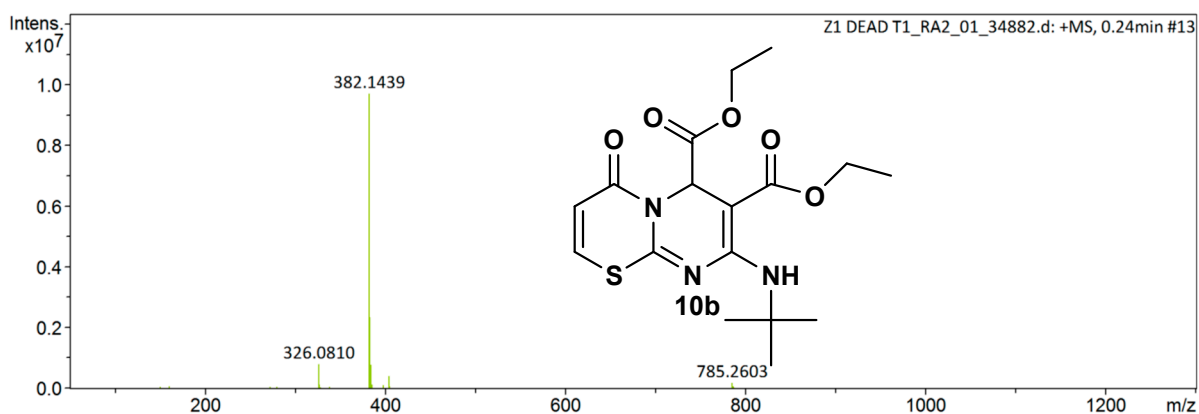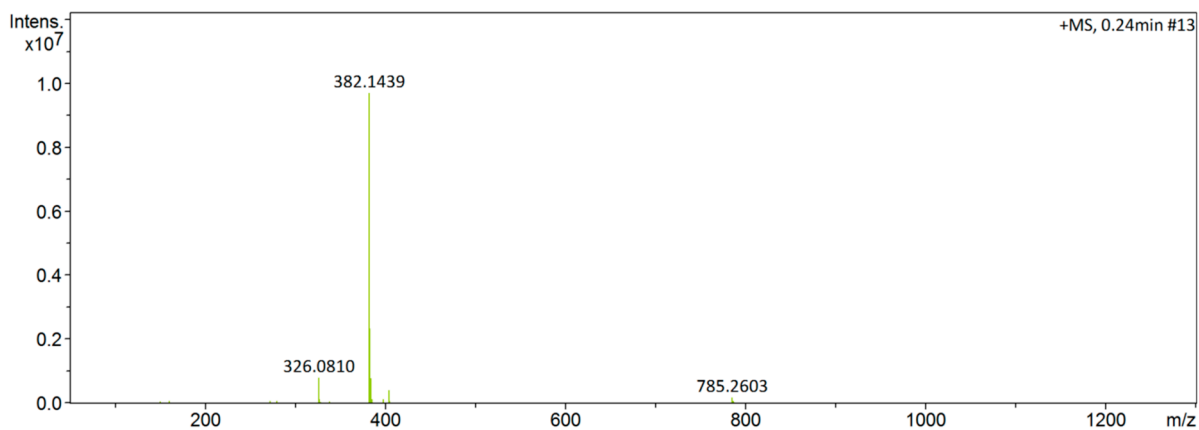

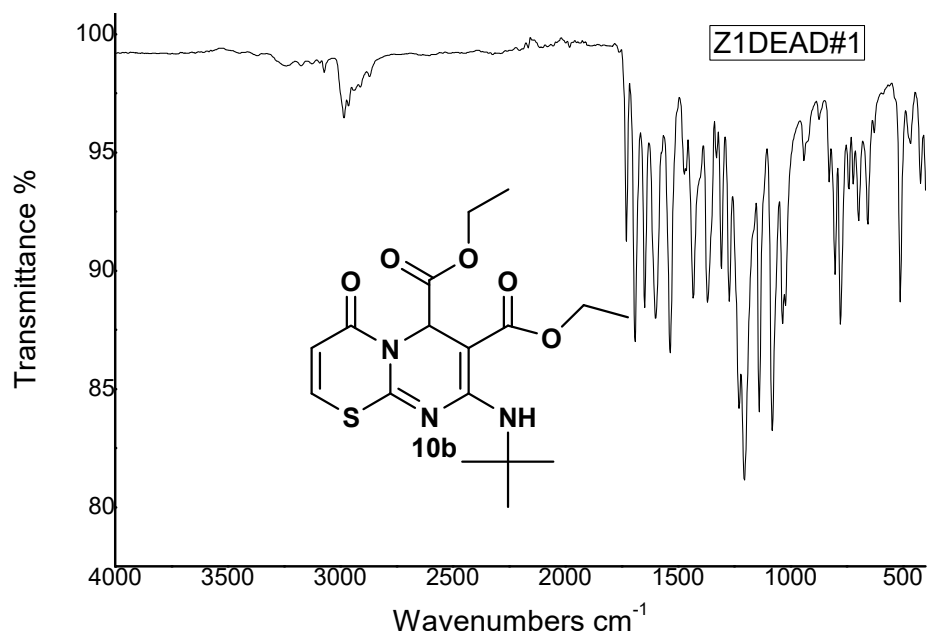

8.631

6.242  
6.229

3.660  
3.612

2.166

1.331

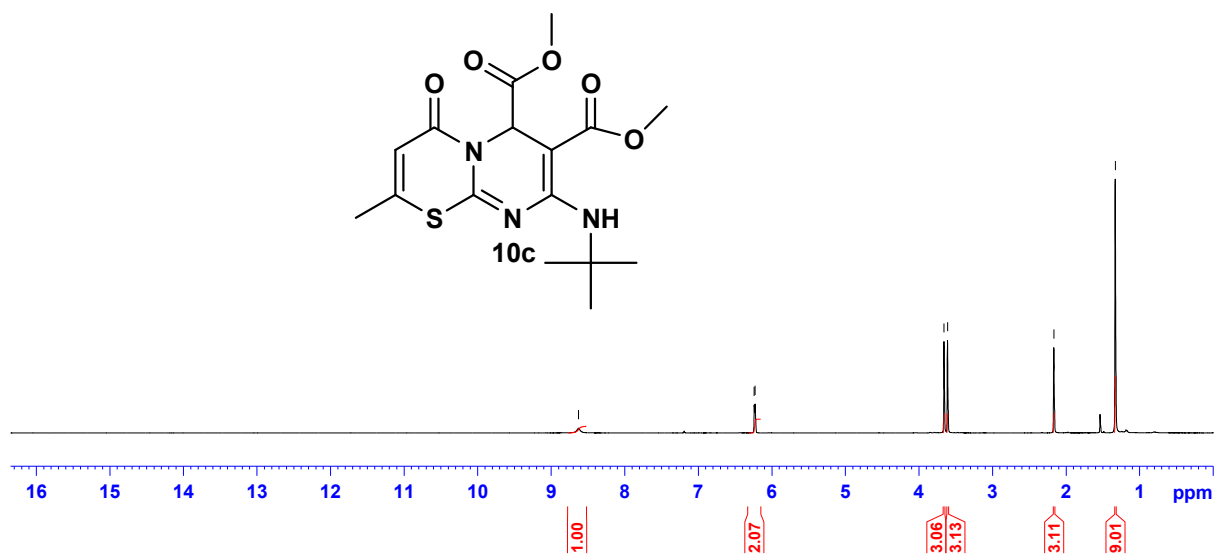

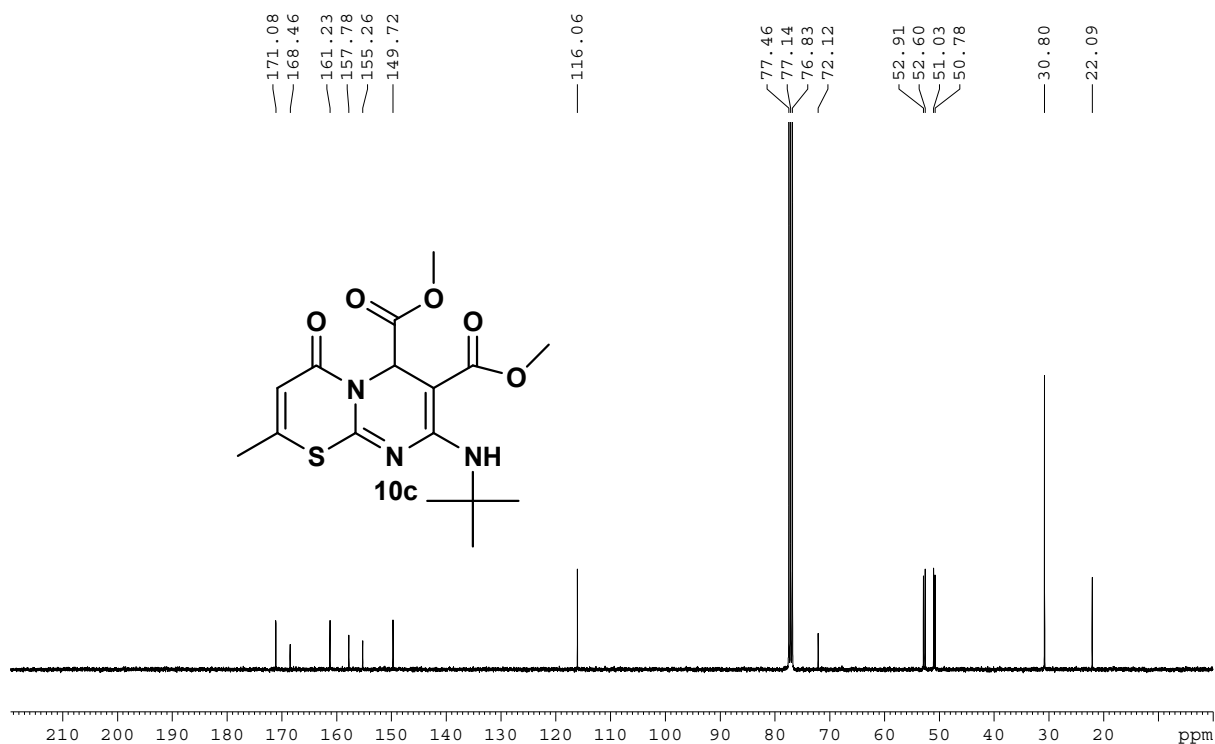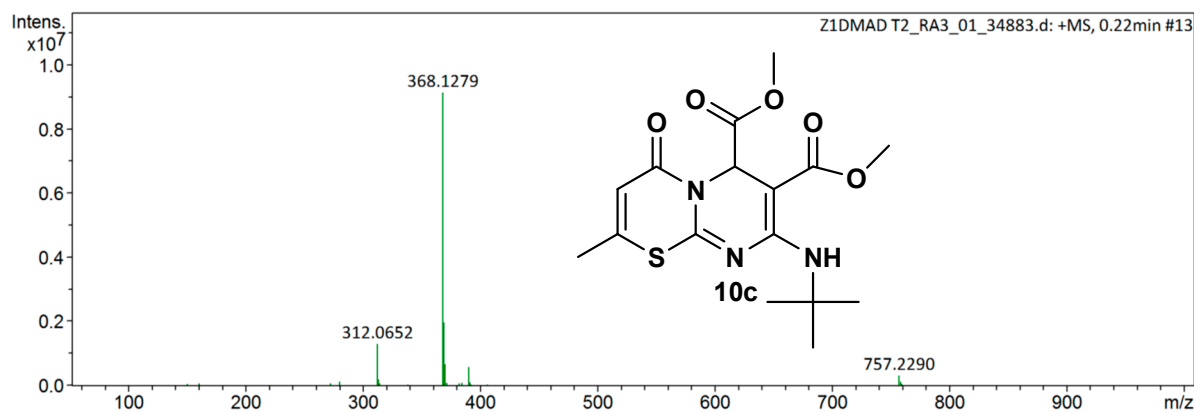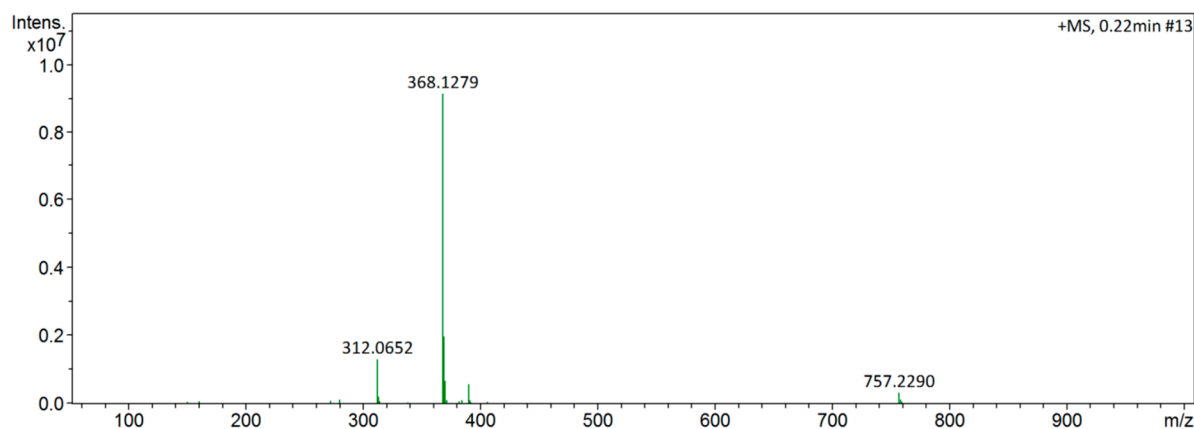

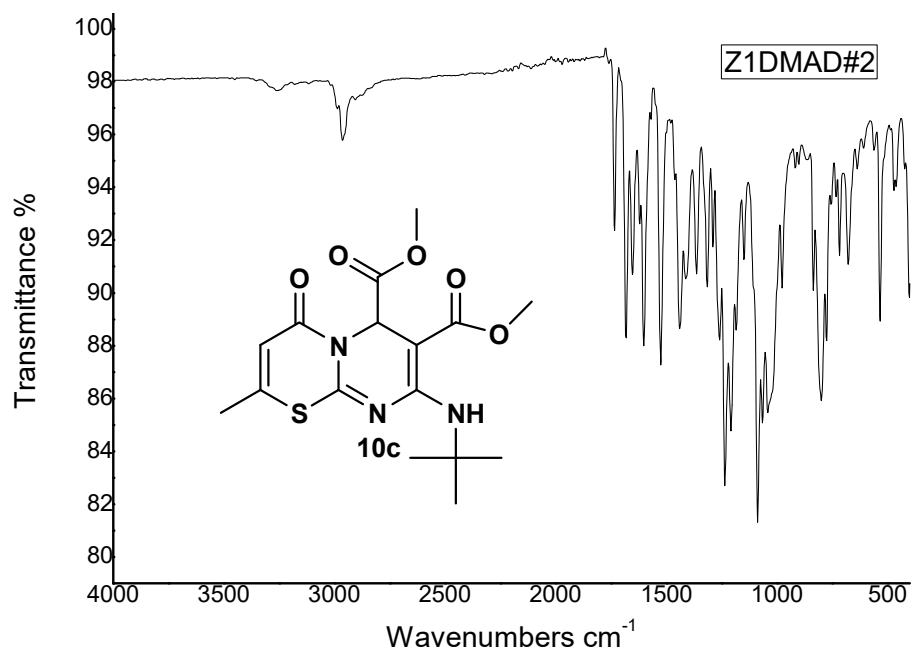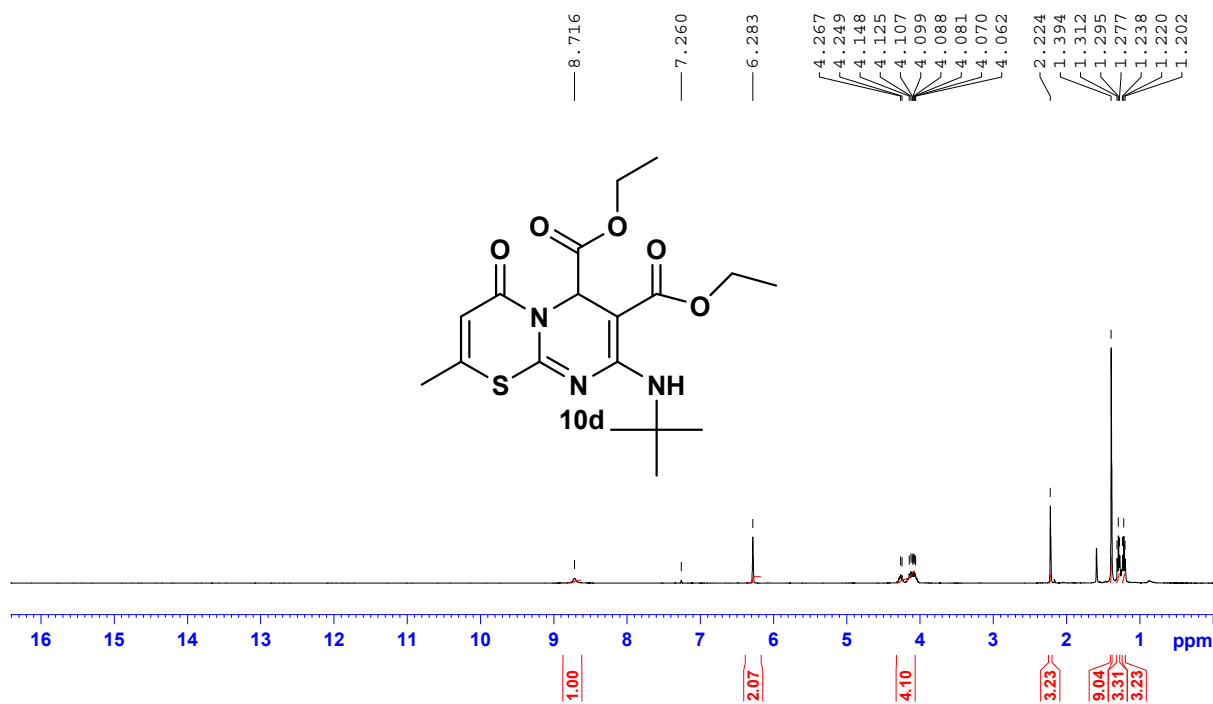



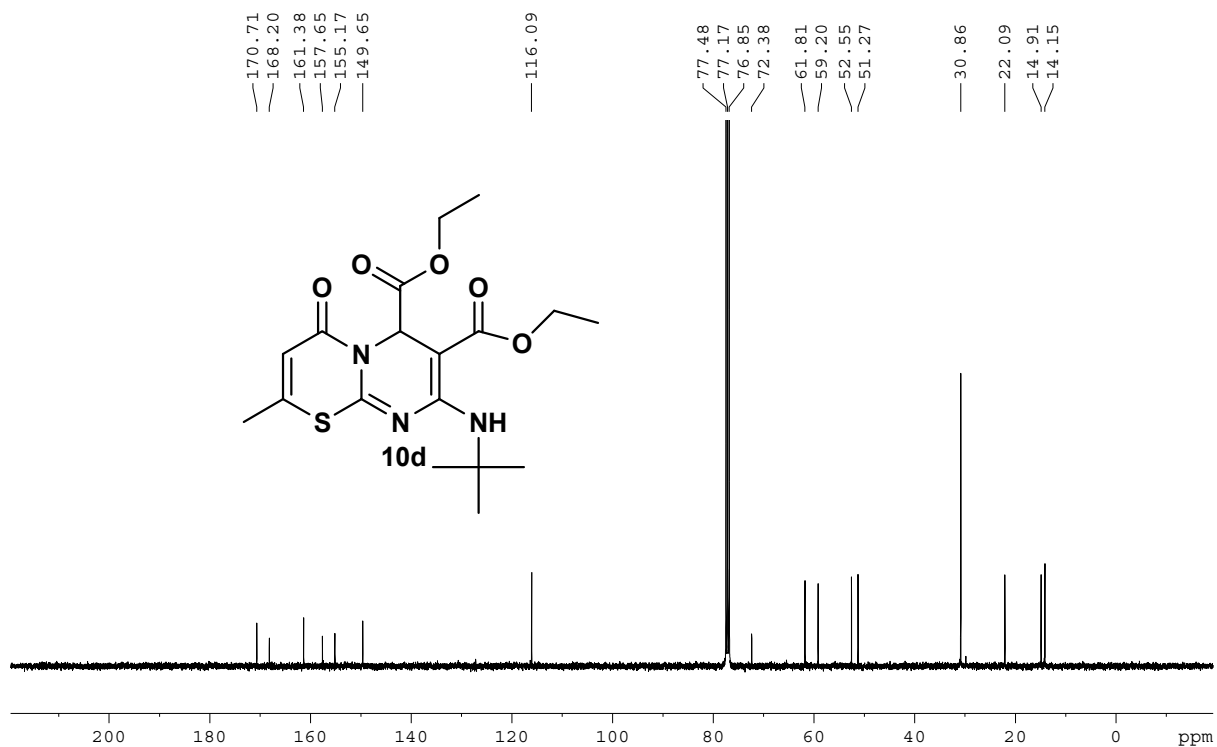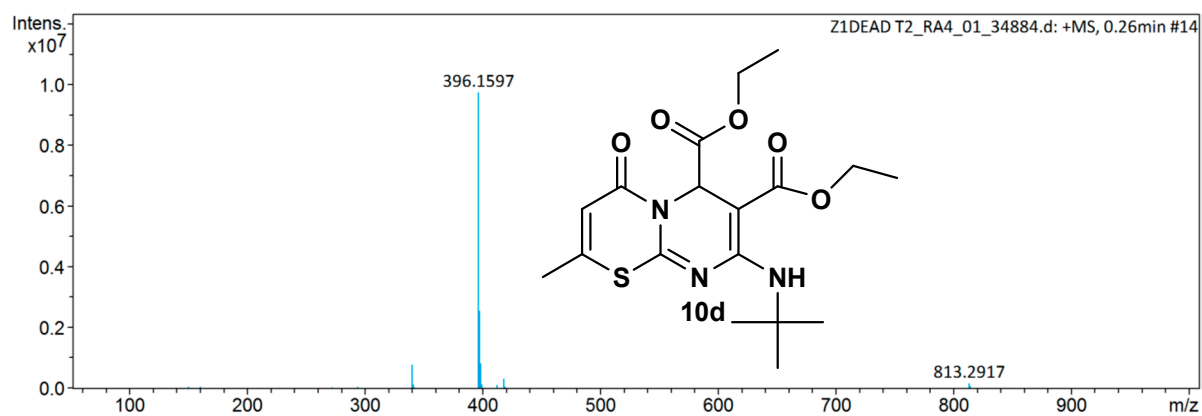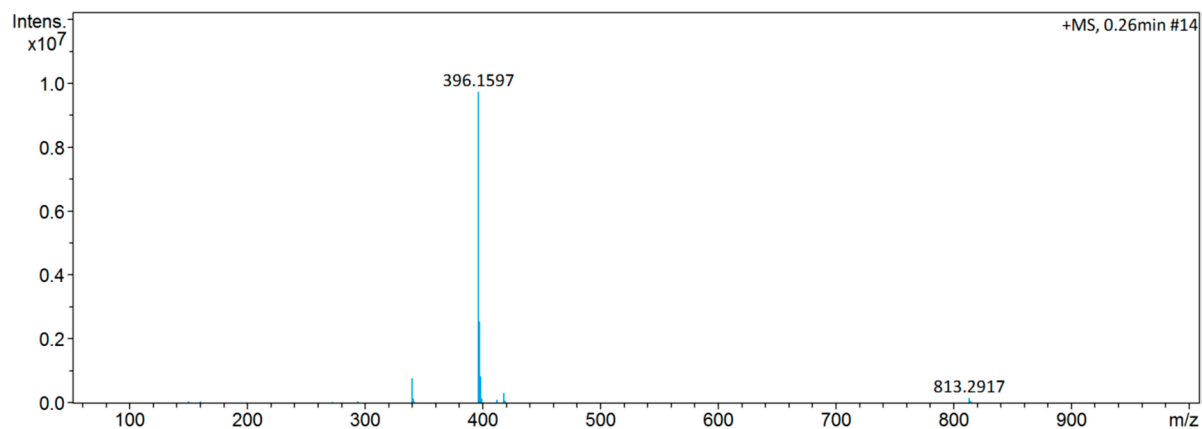

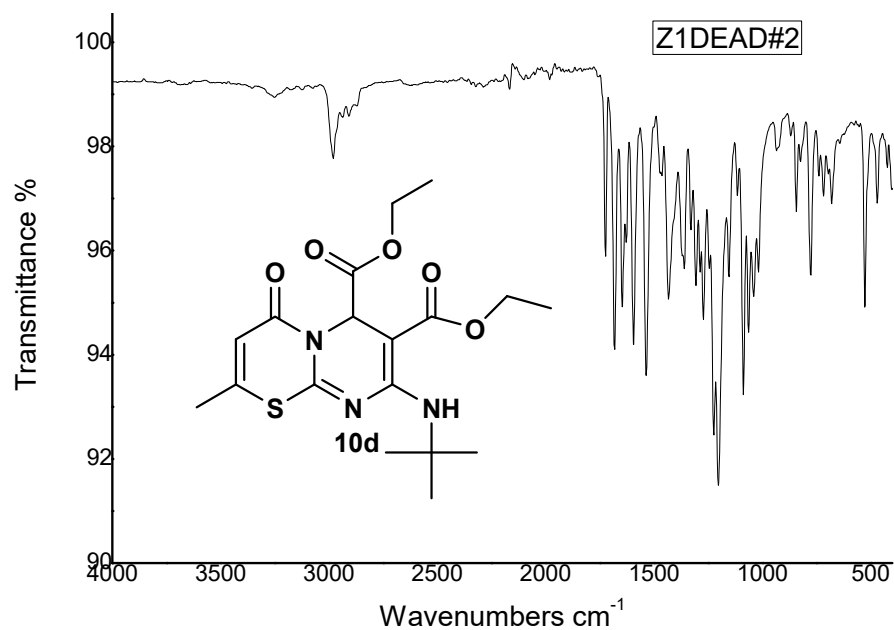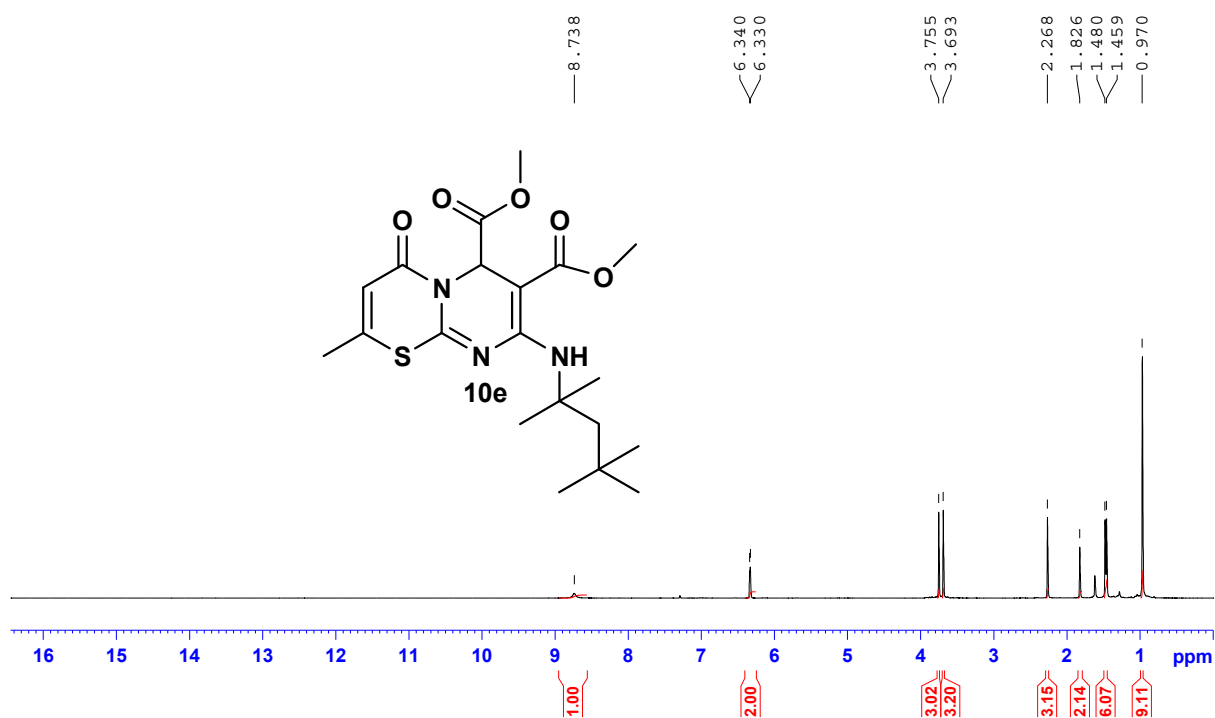

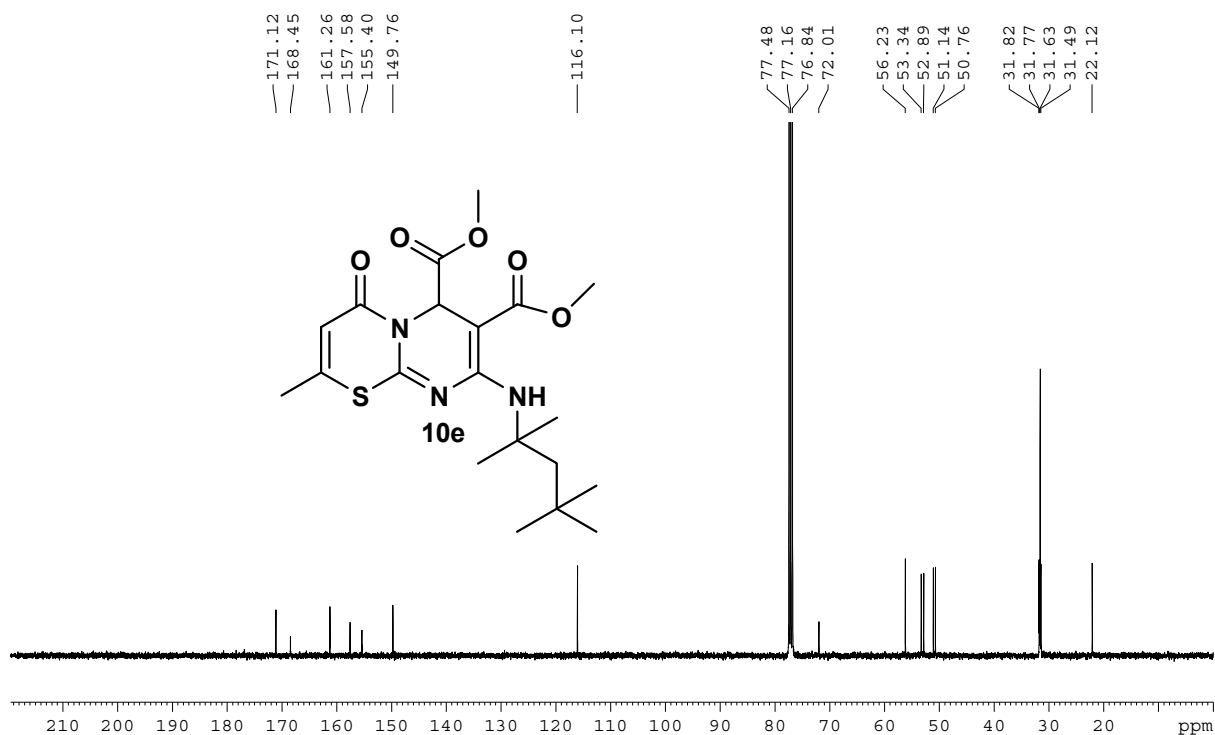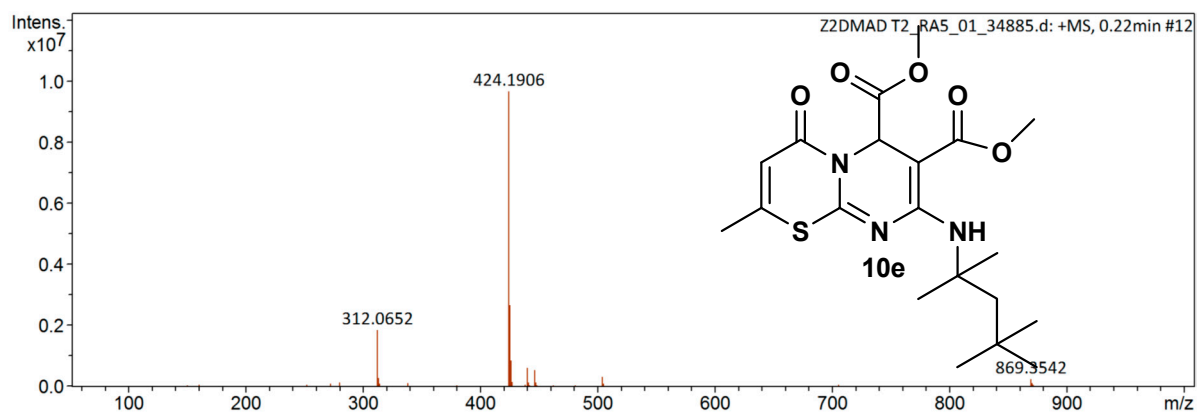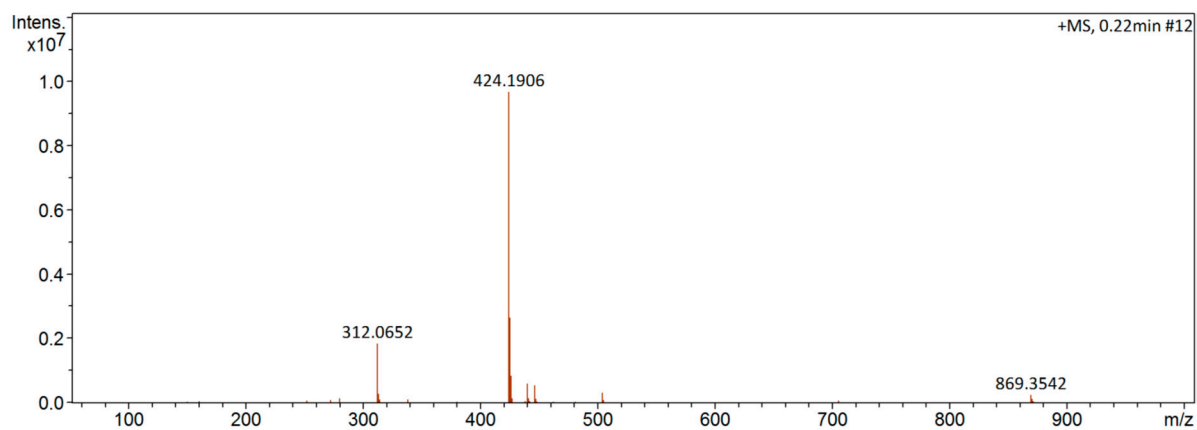

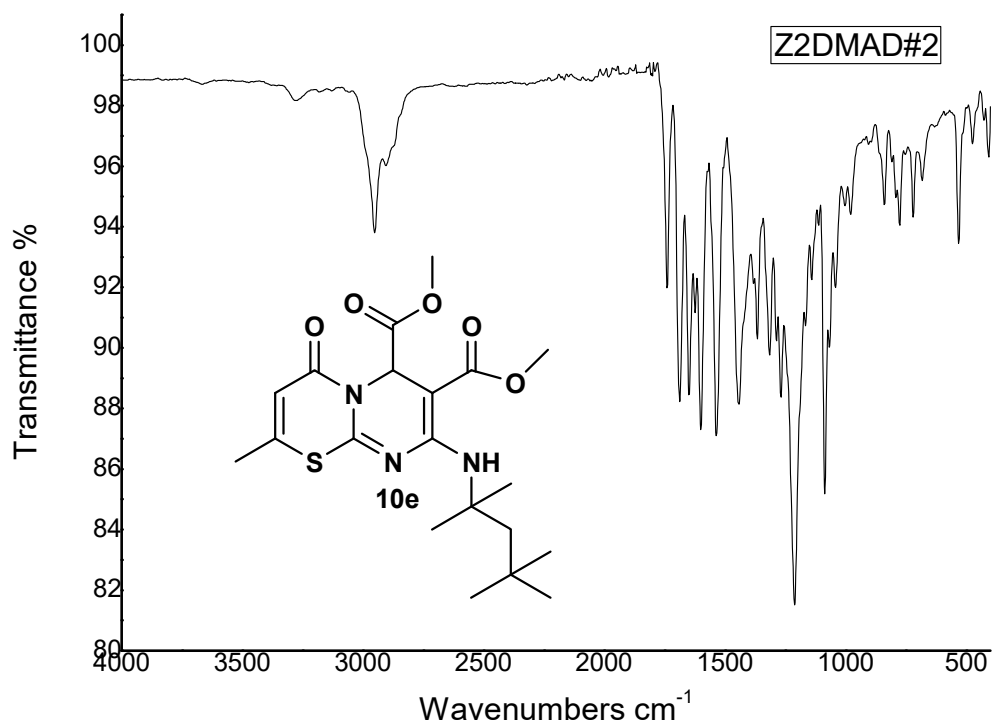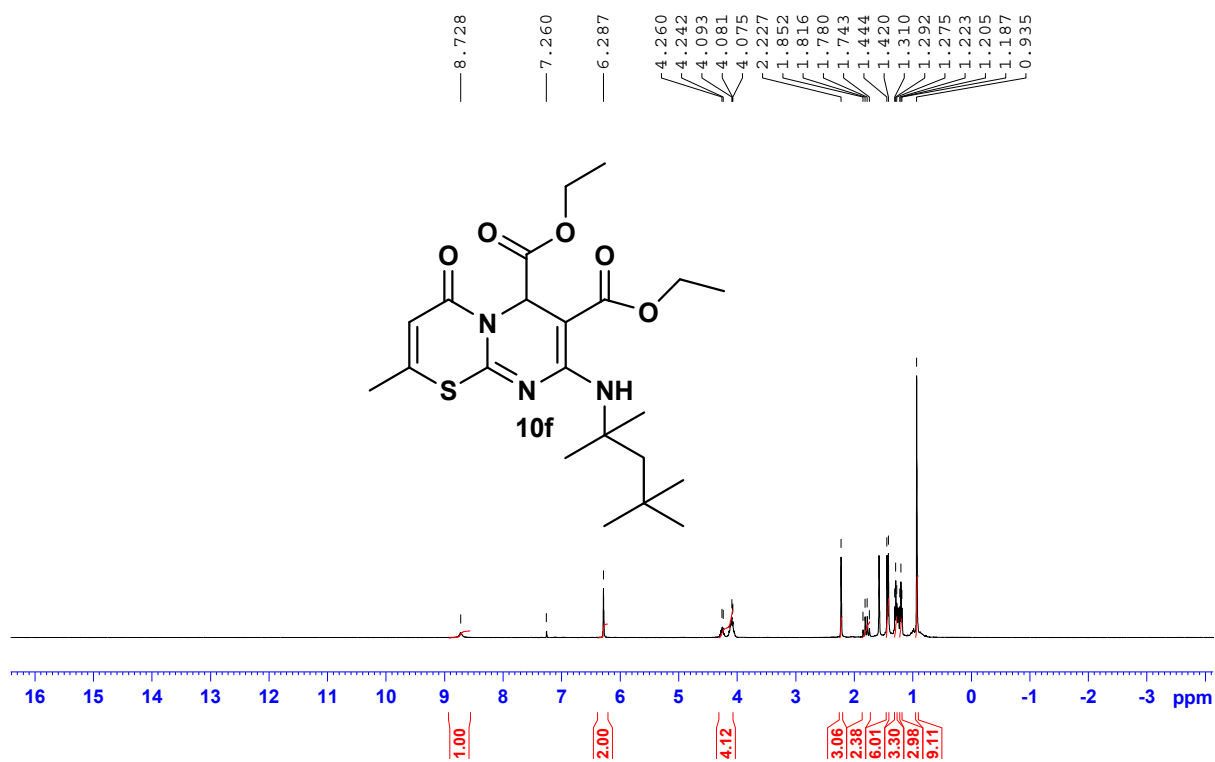

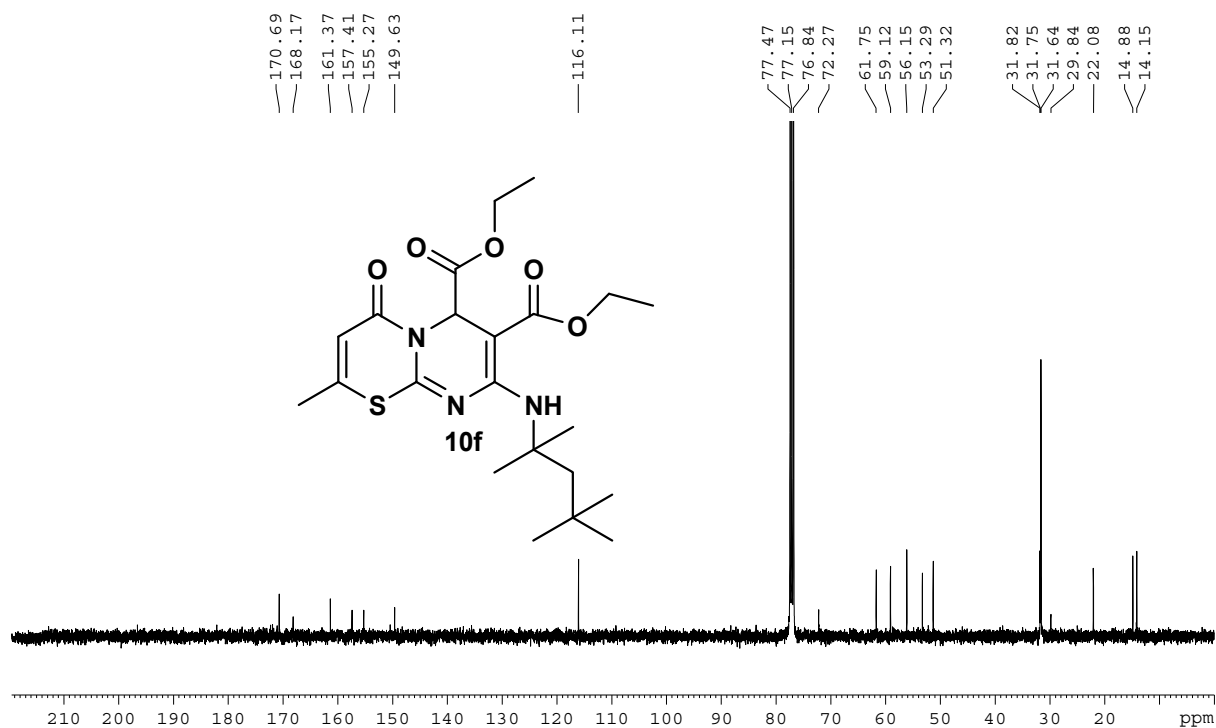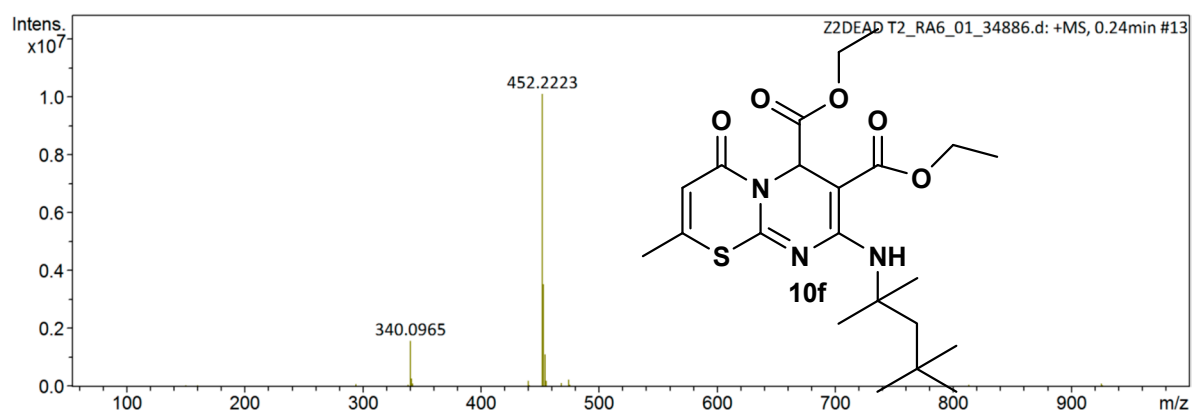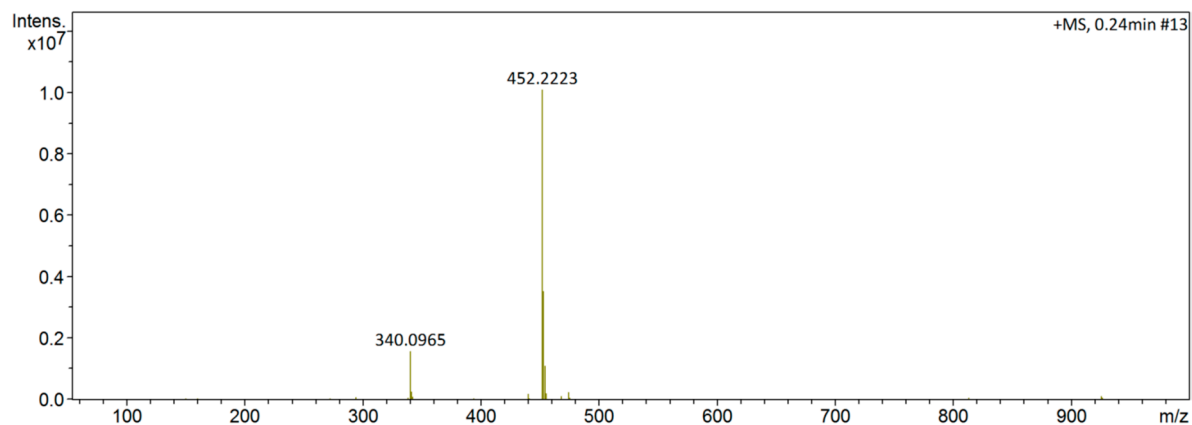

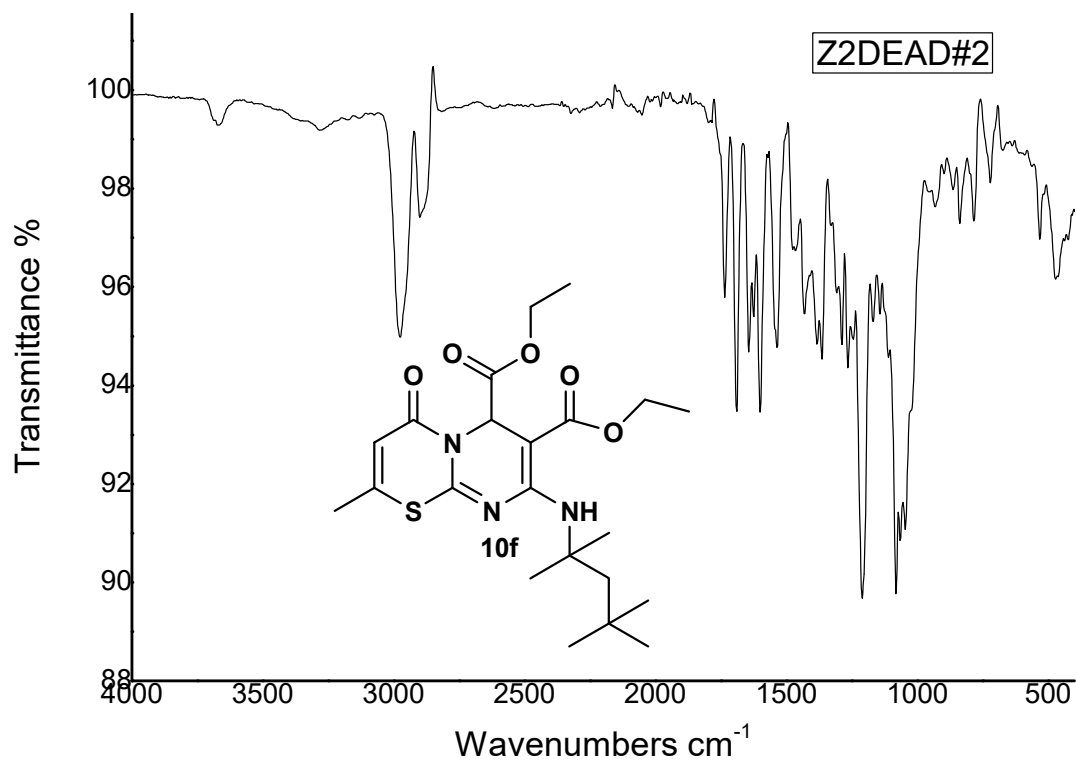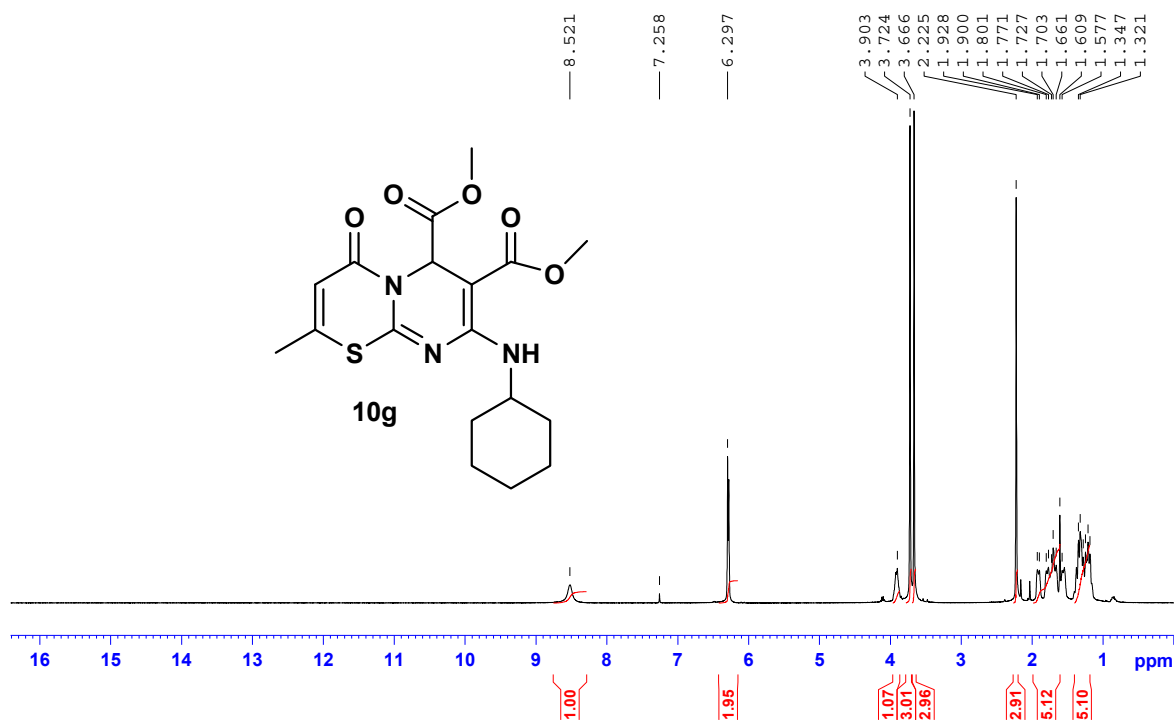

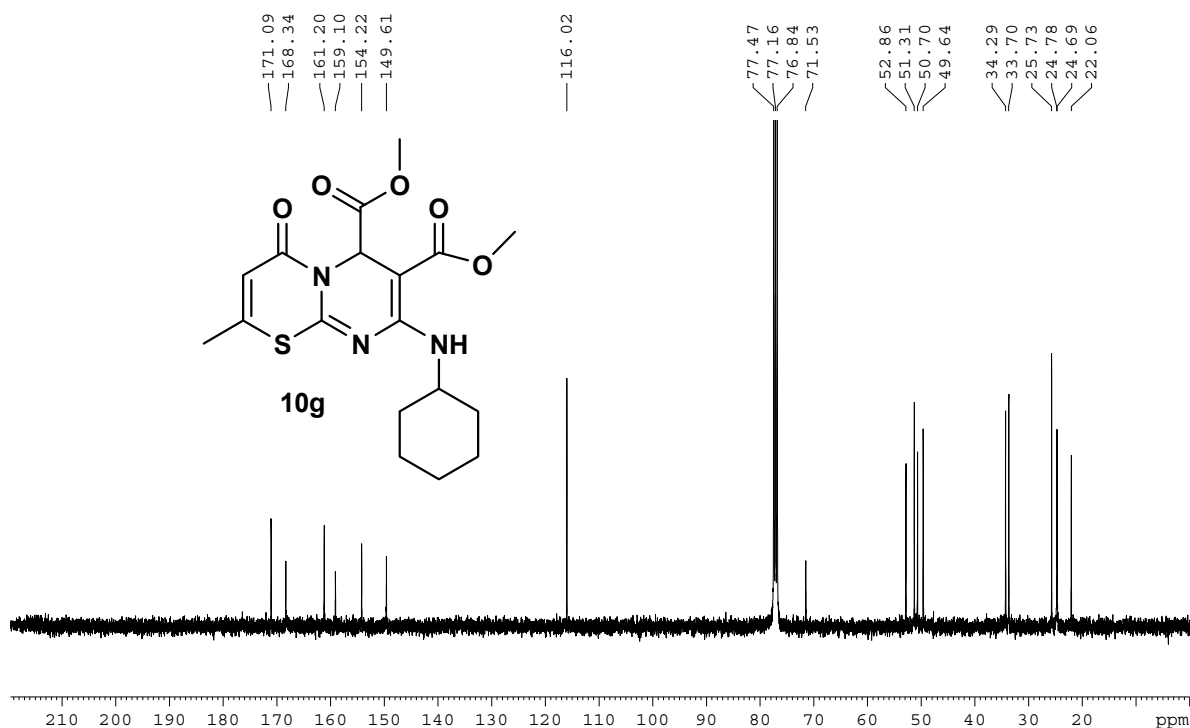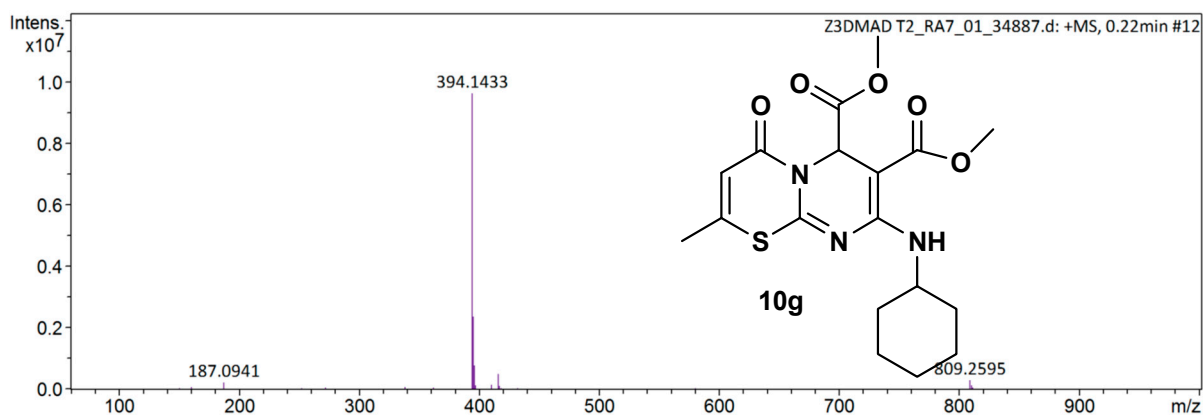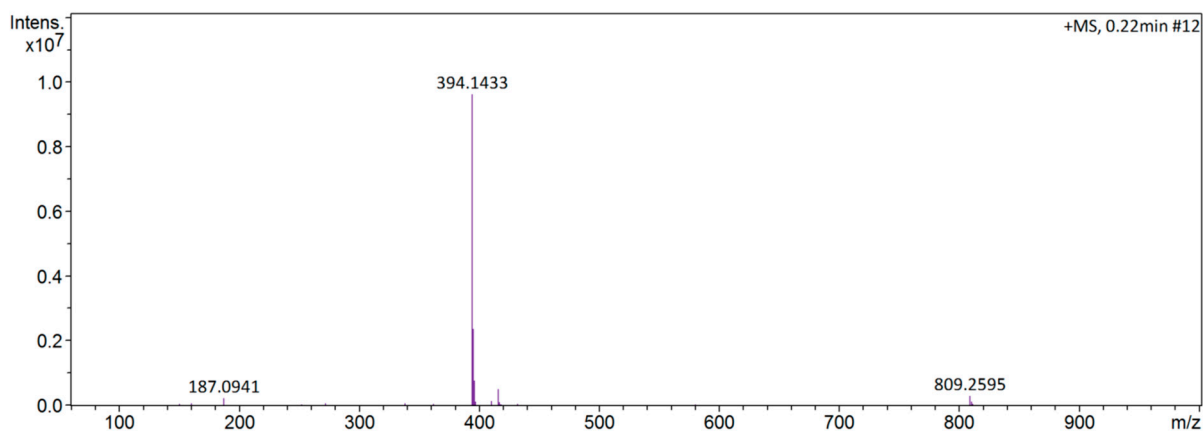

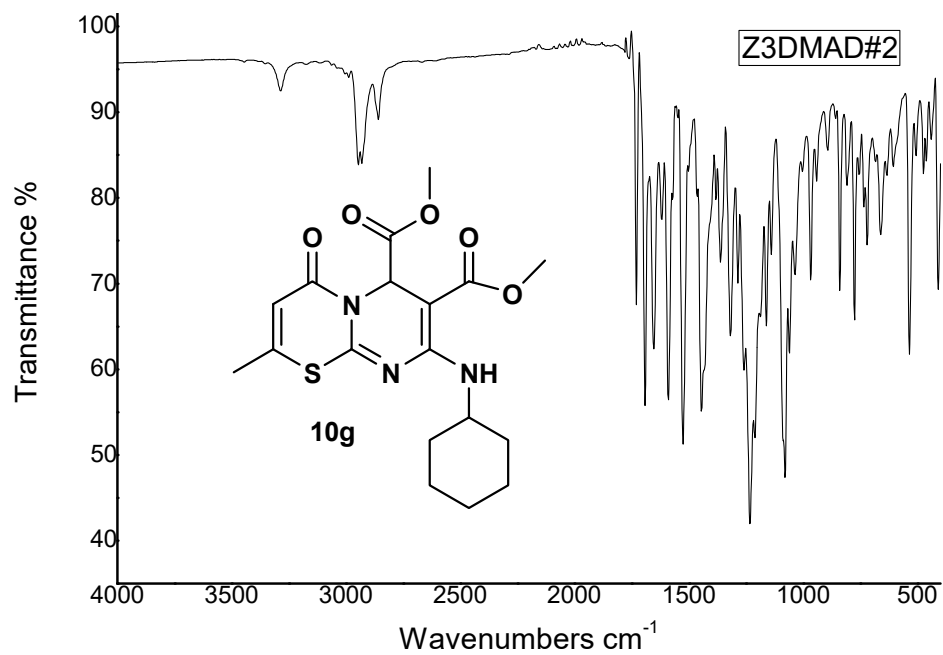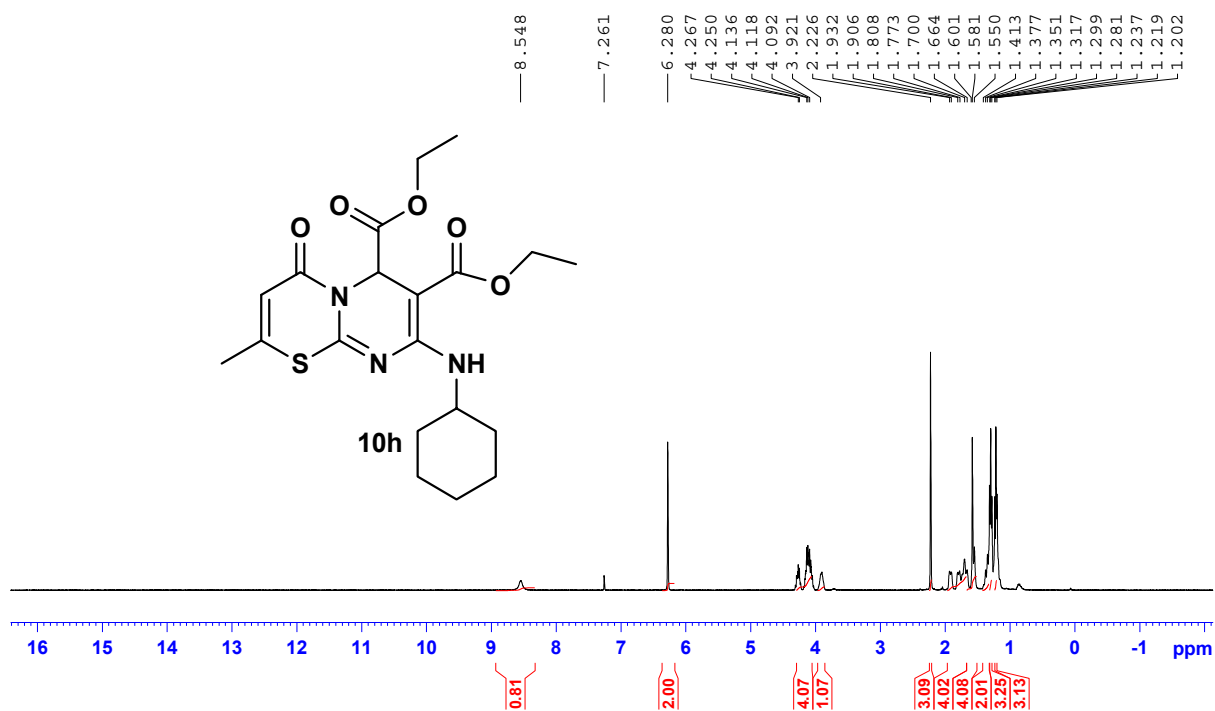



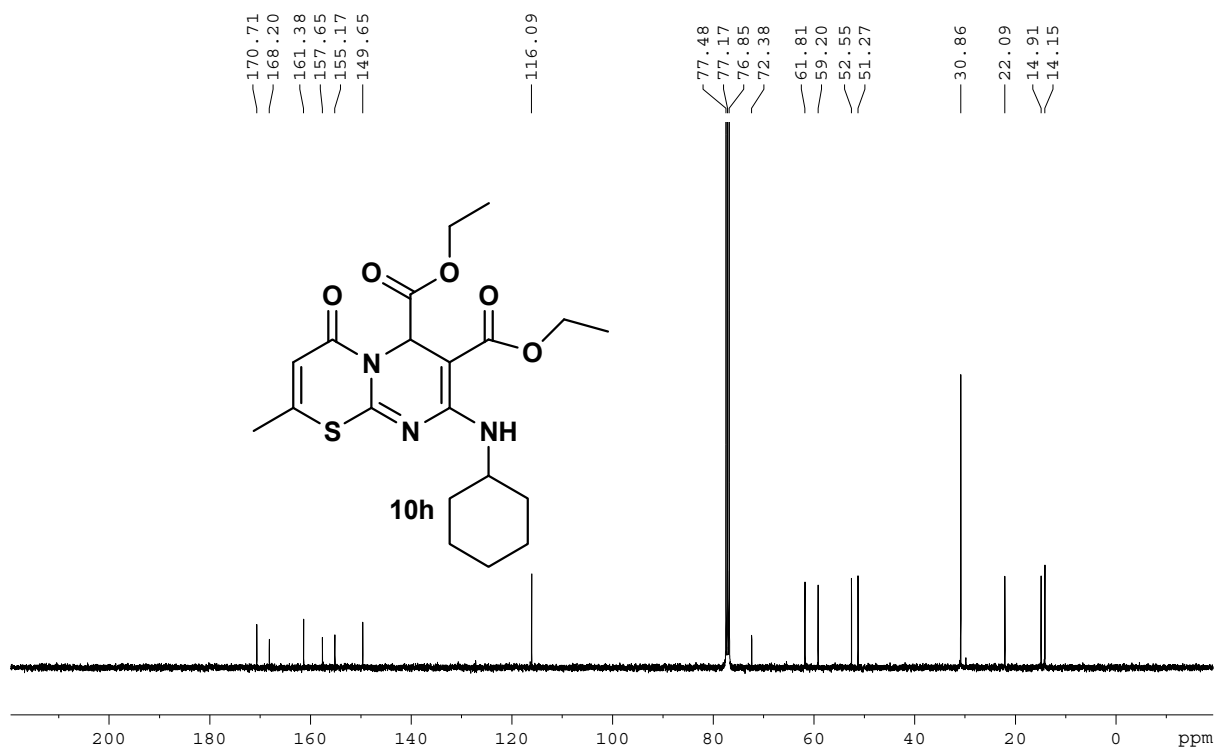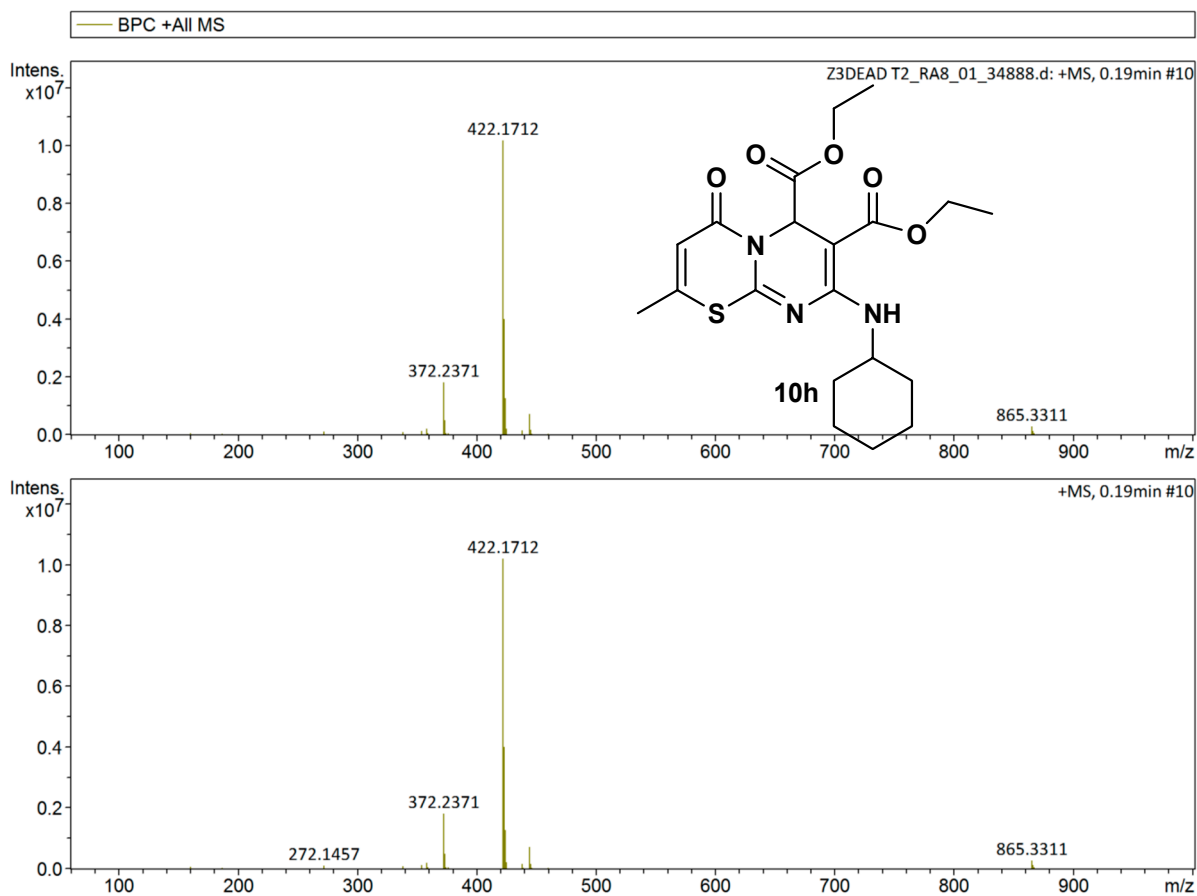

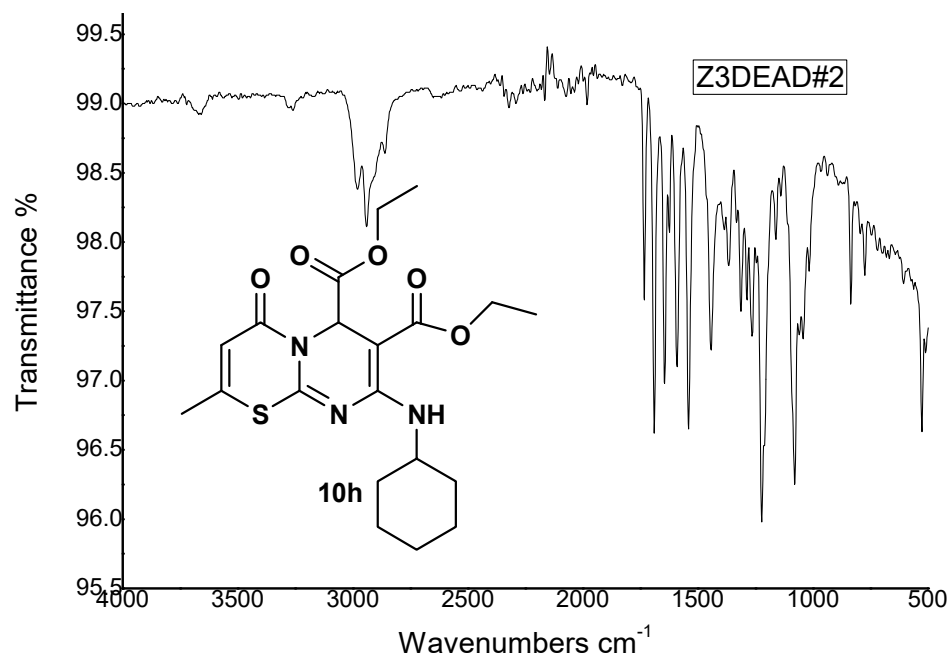

— 8.704 — 7.262 — 6.312

3.729 3.683 2.532 2.514 2.495 2.477 1.404 1.294 1.275 1.257

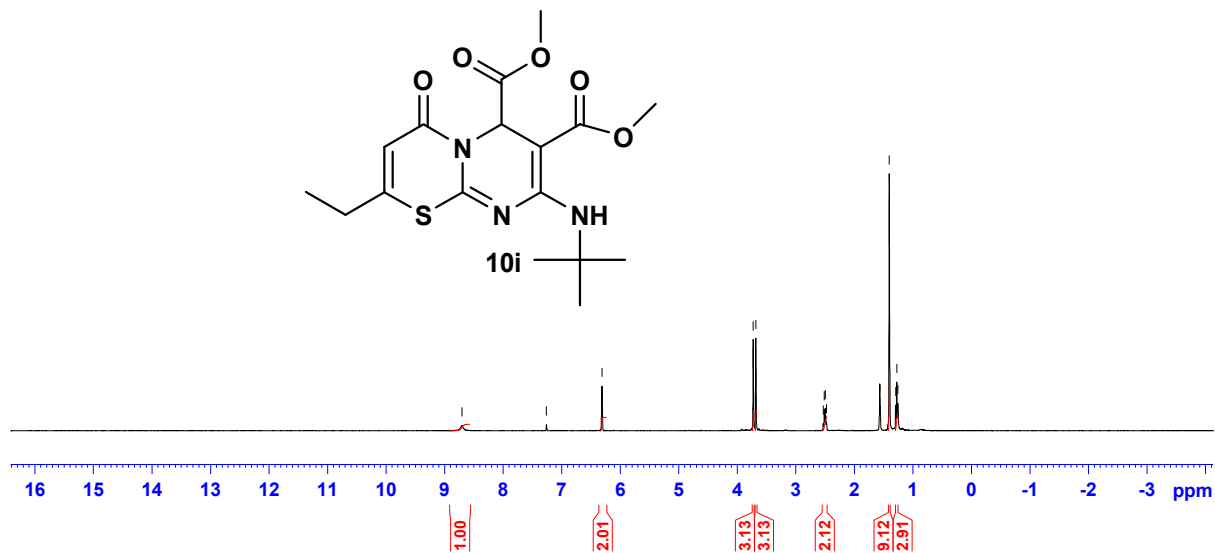

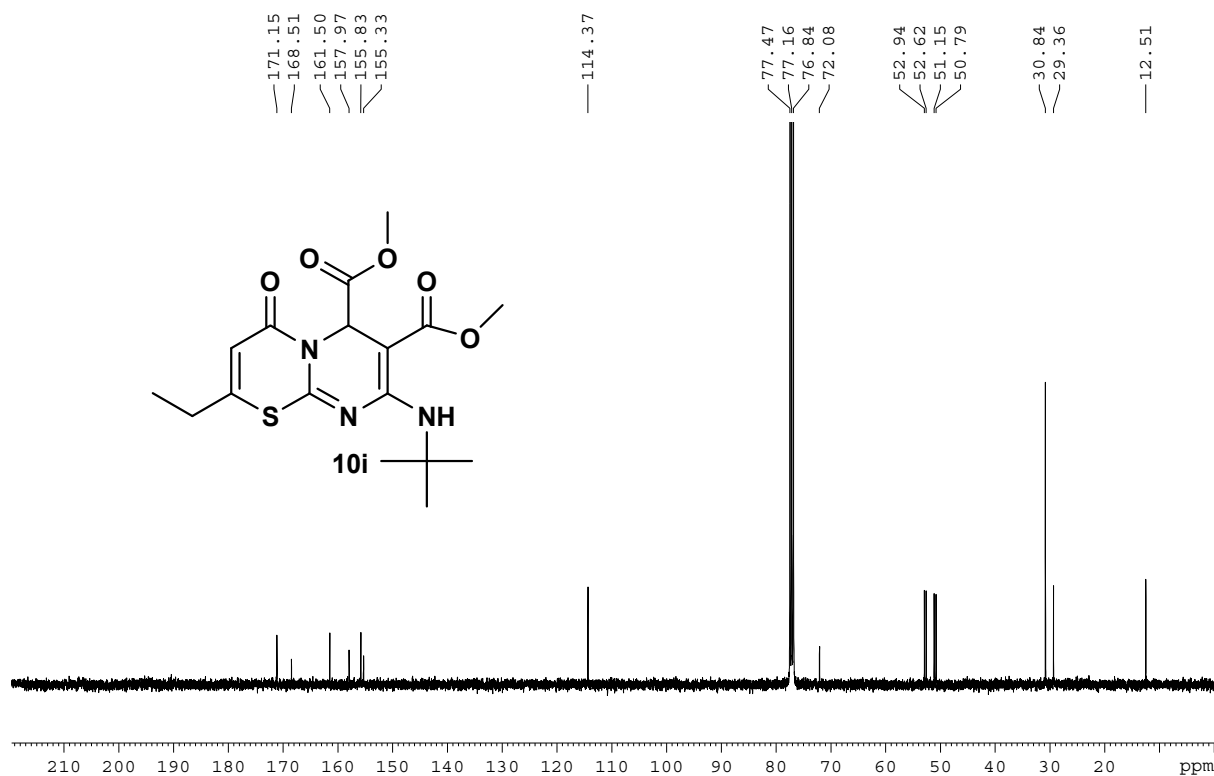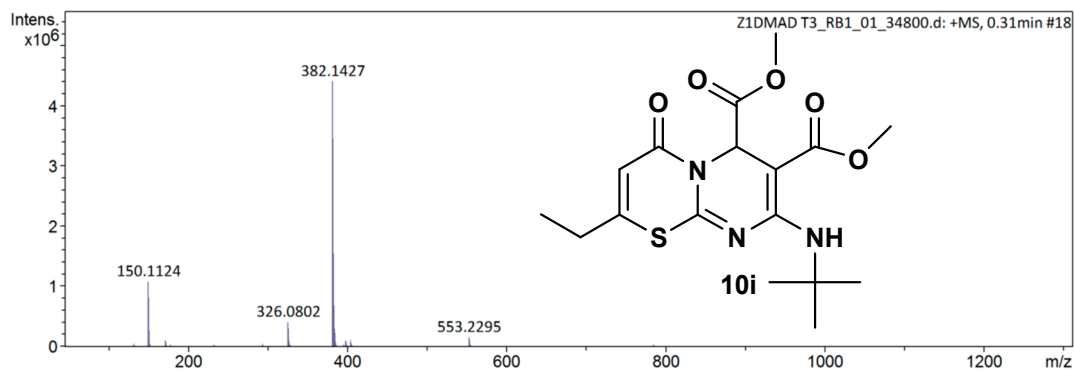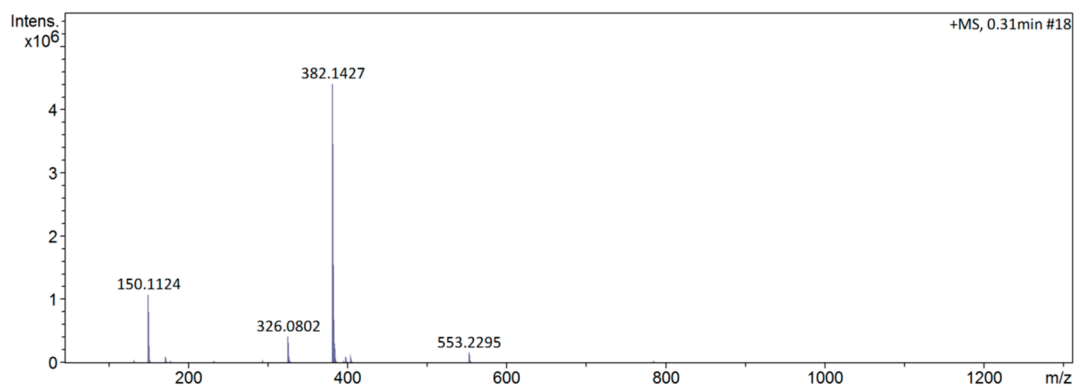

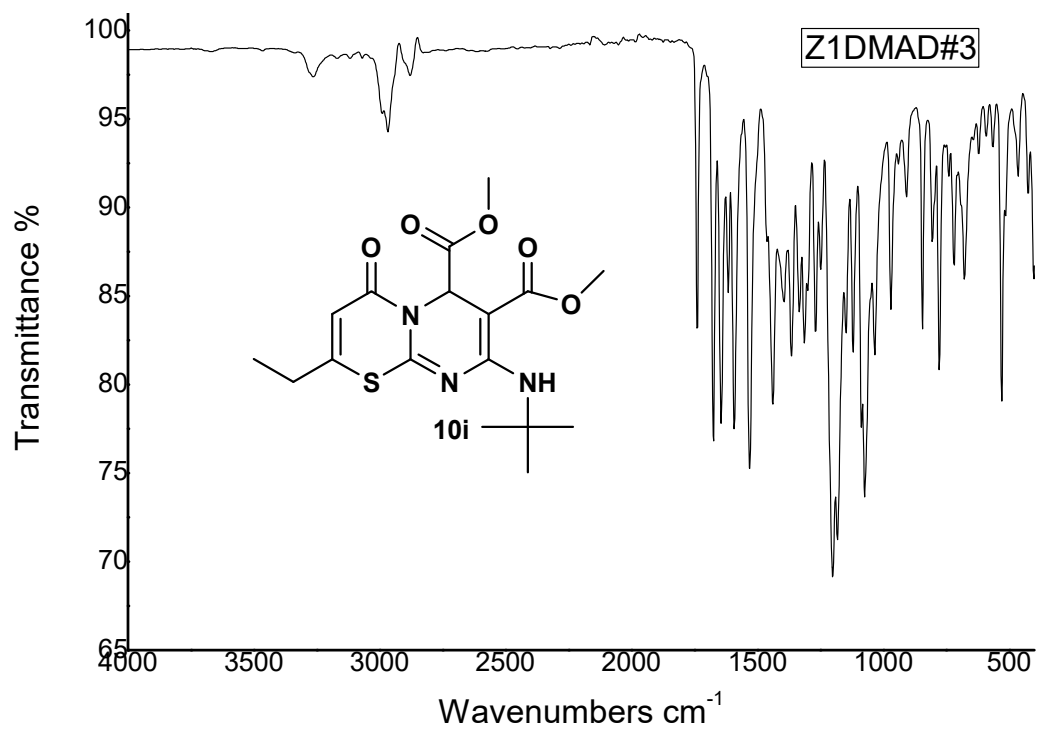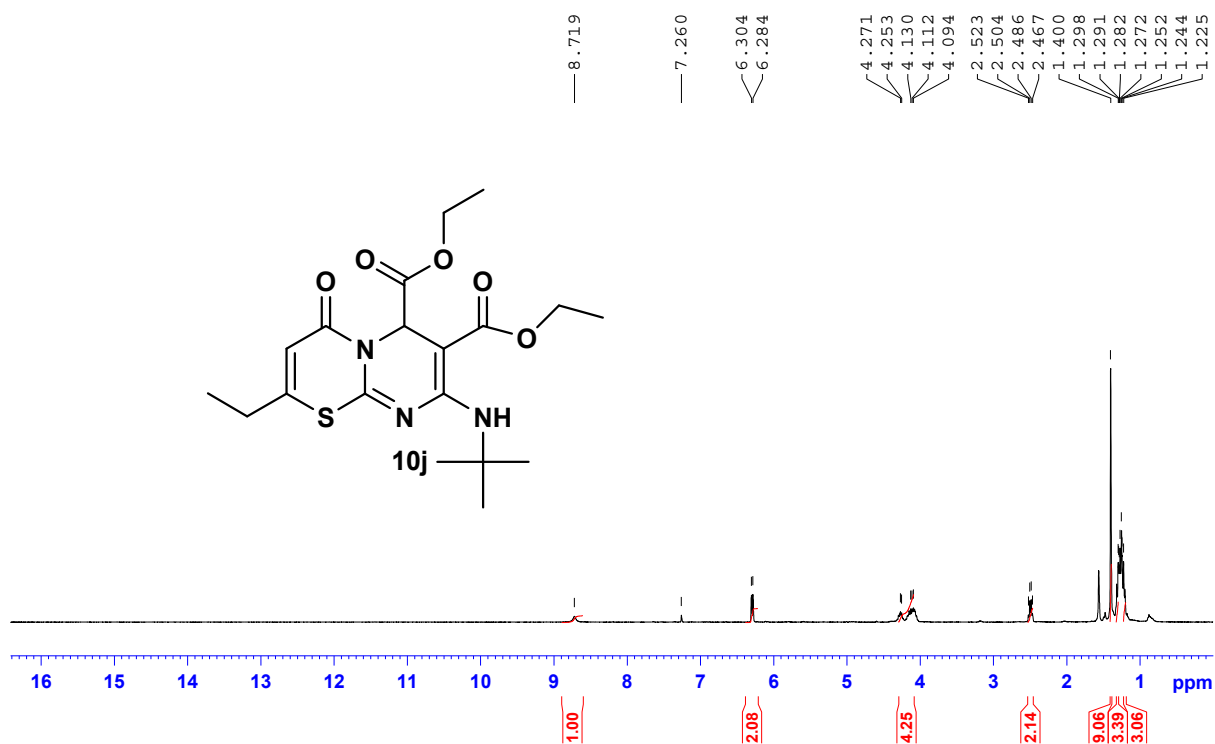

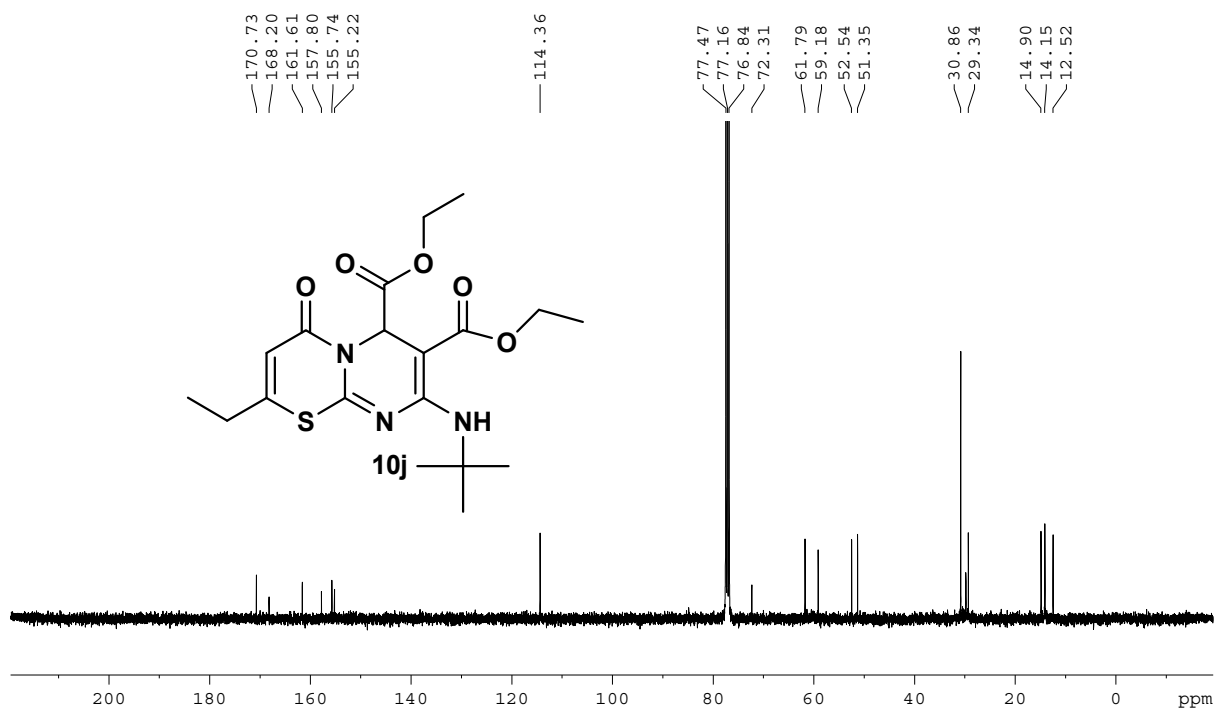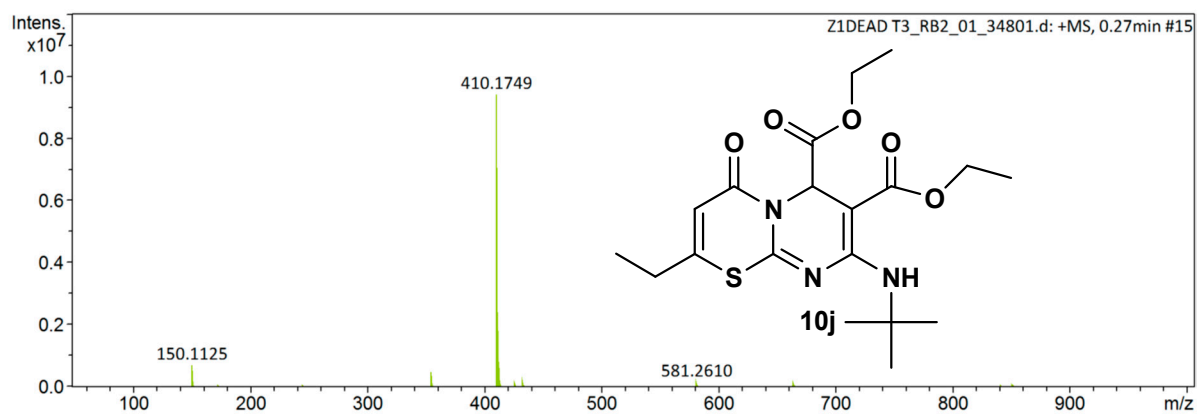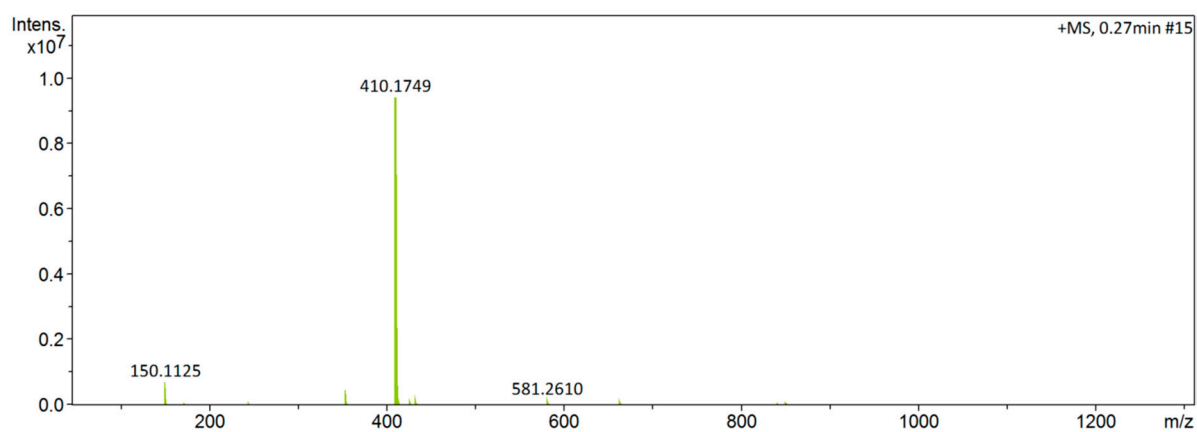

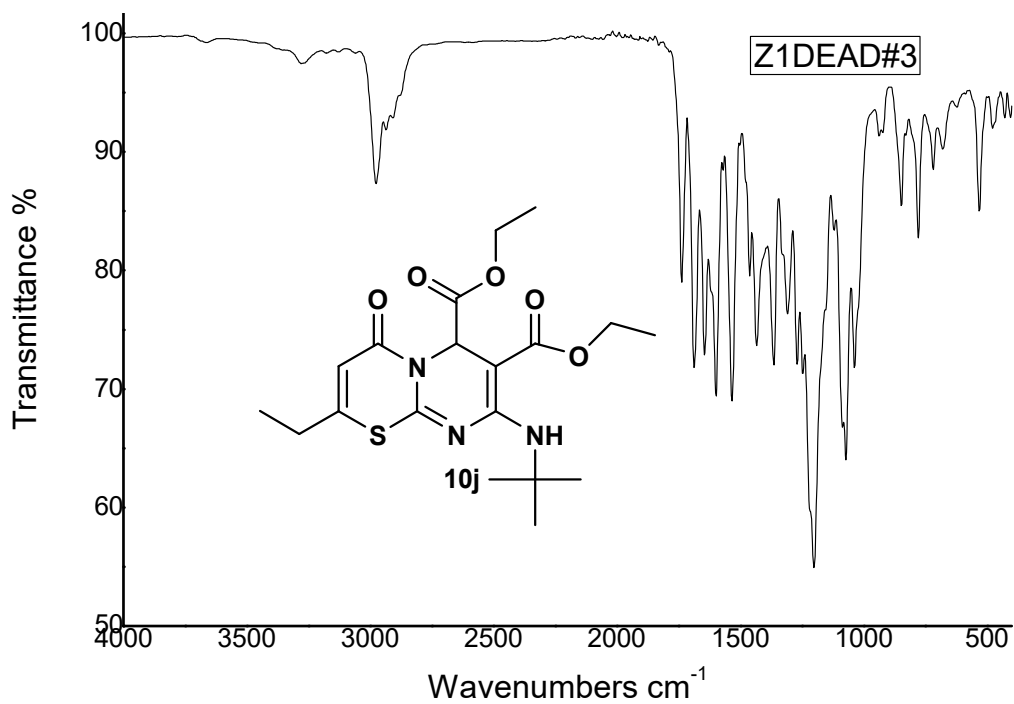

8.644

6.249  
6.238

3.655  
3.595

2.467  
2.448

2.430  
2.412

1.730  
1.382

1.364  
1.226

1.208  
1.185

0.872

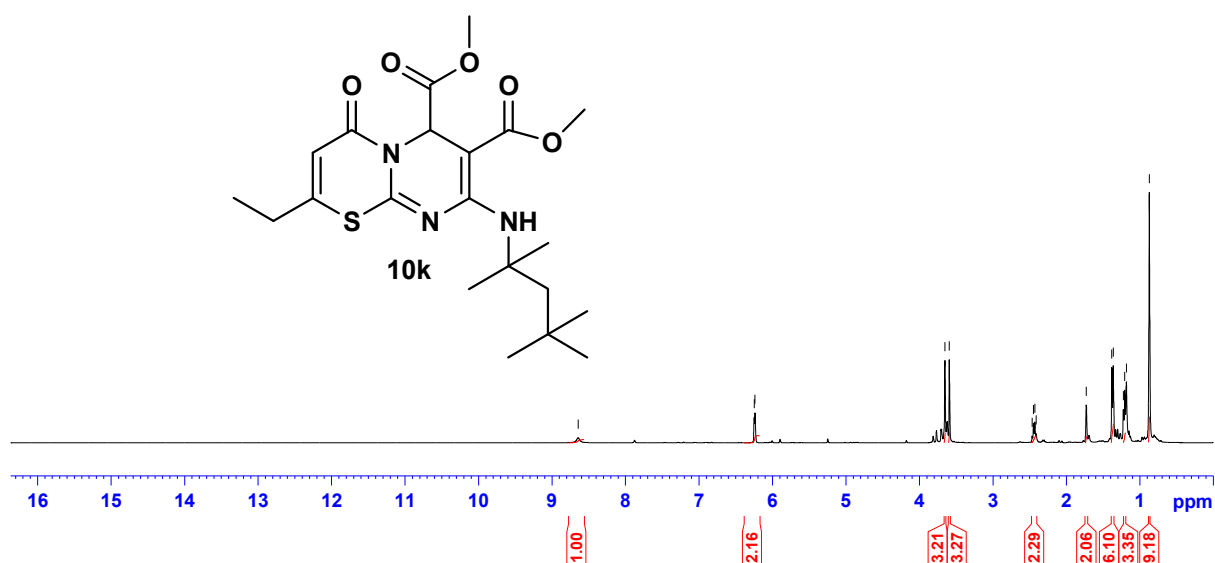

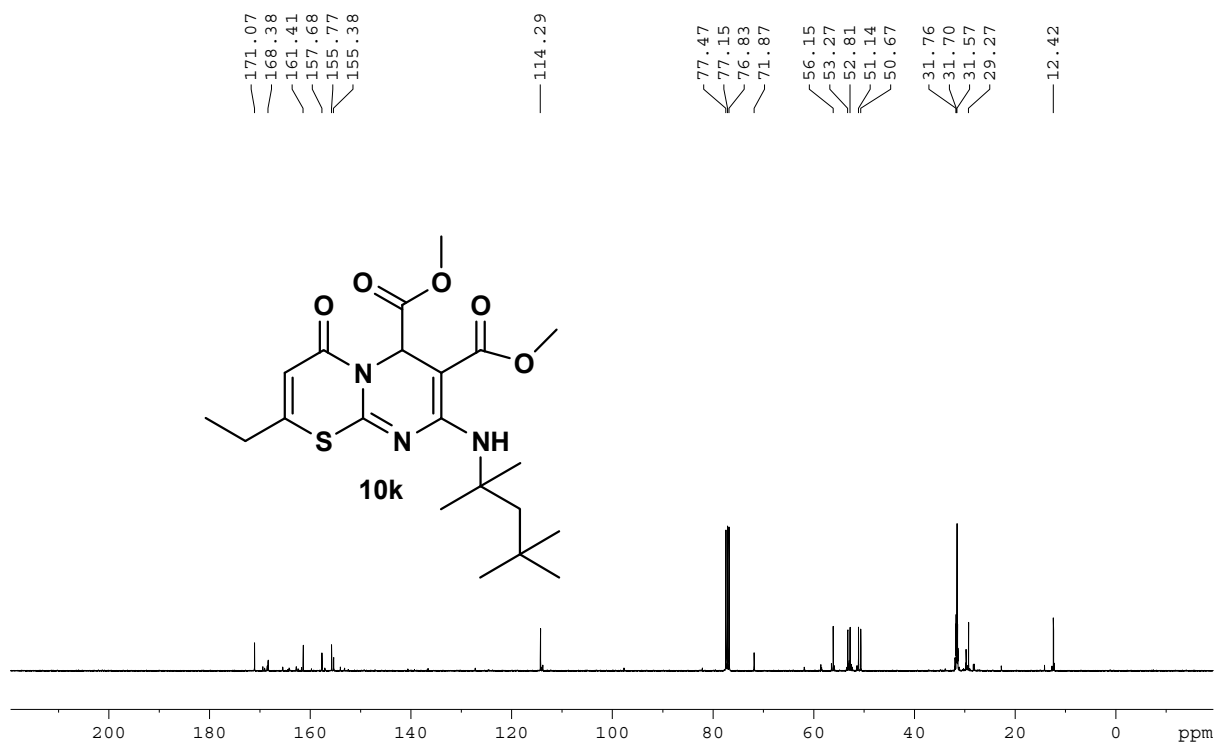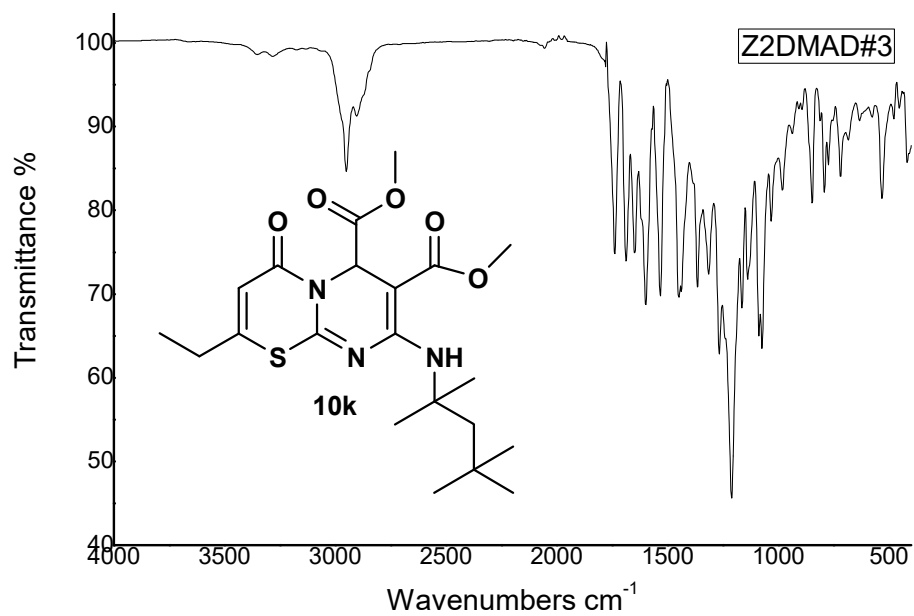

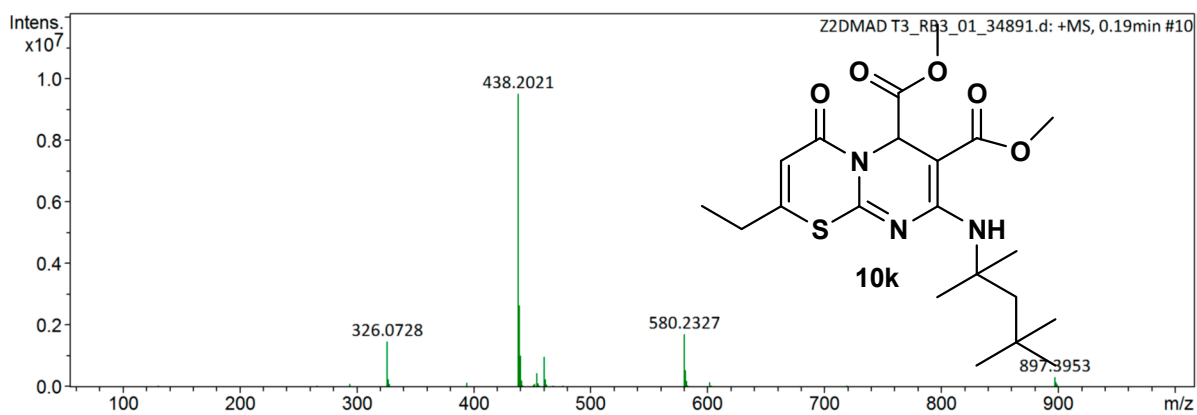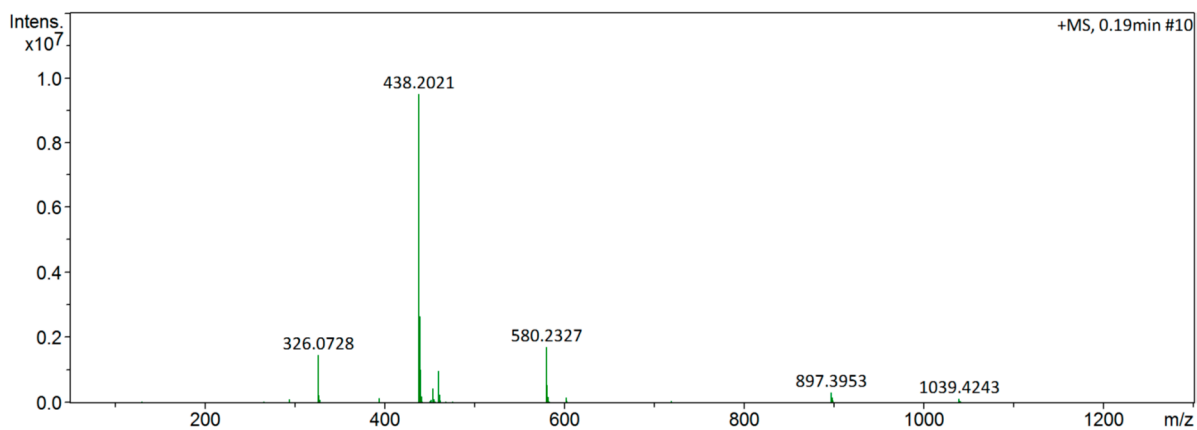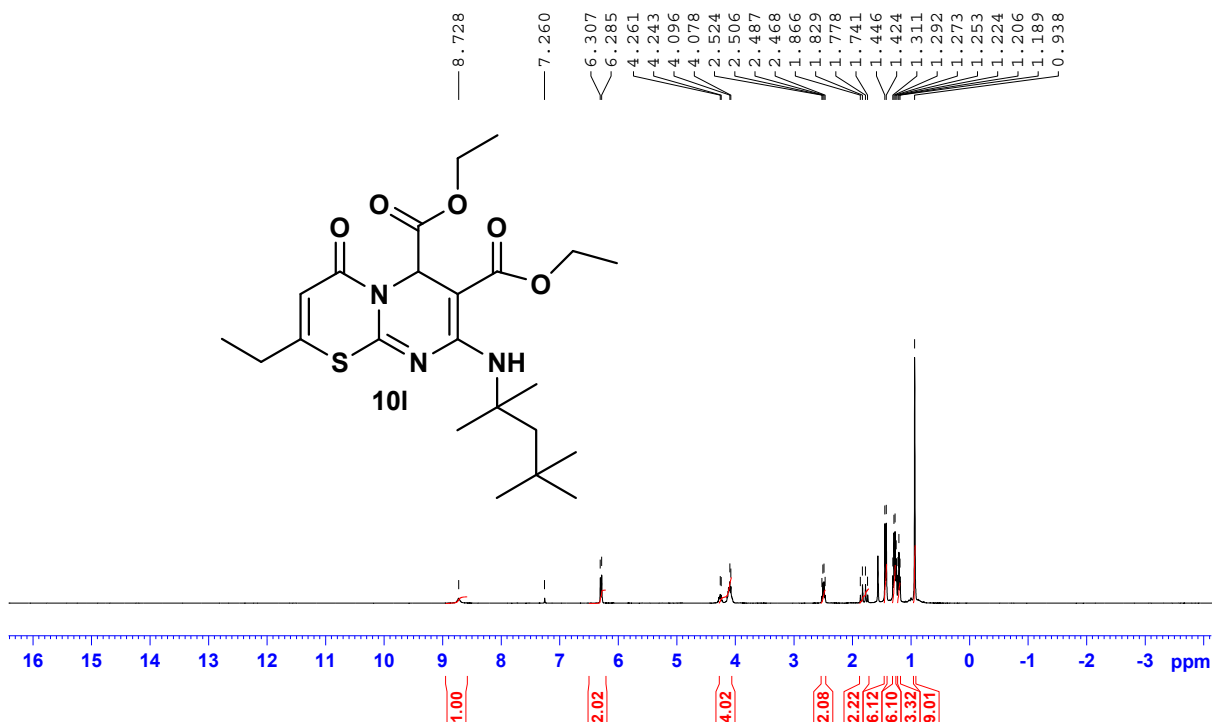



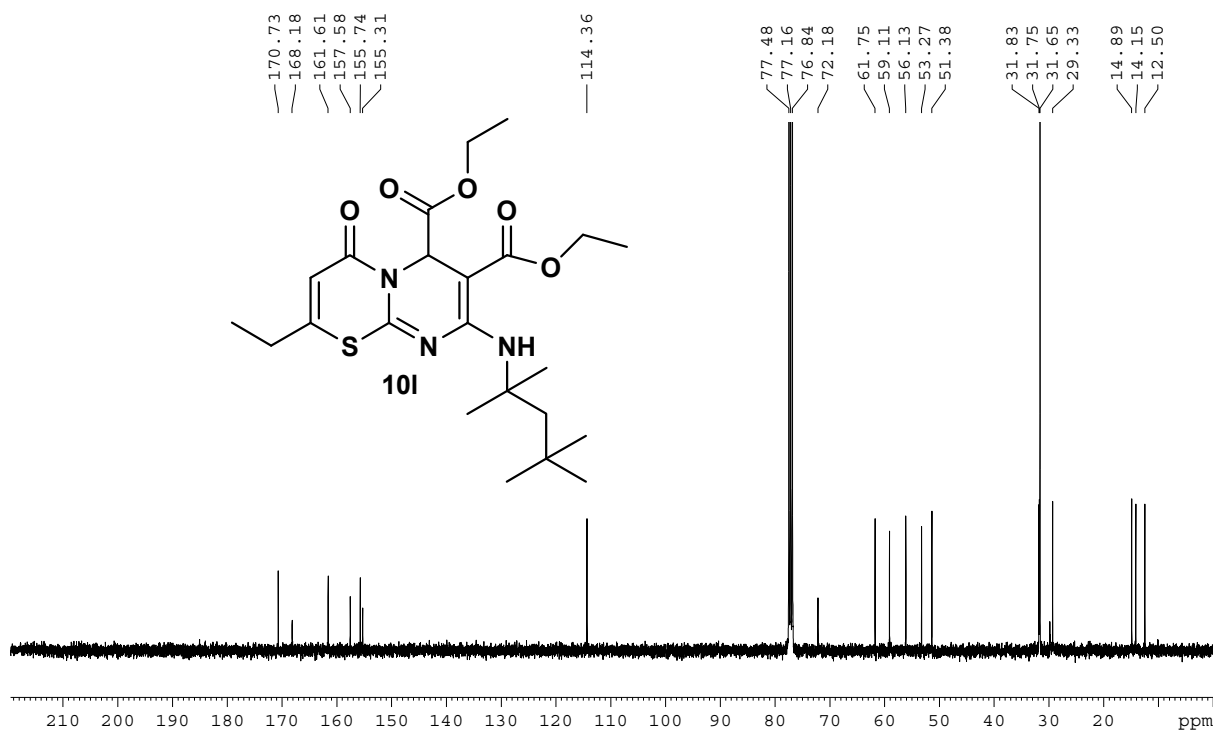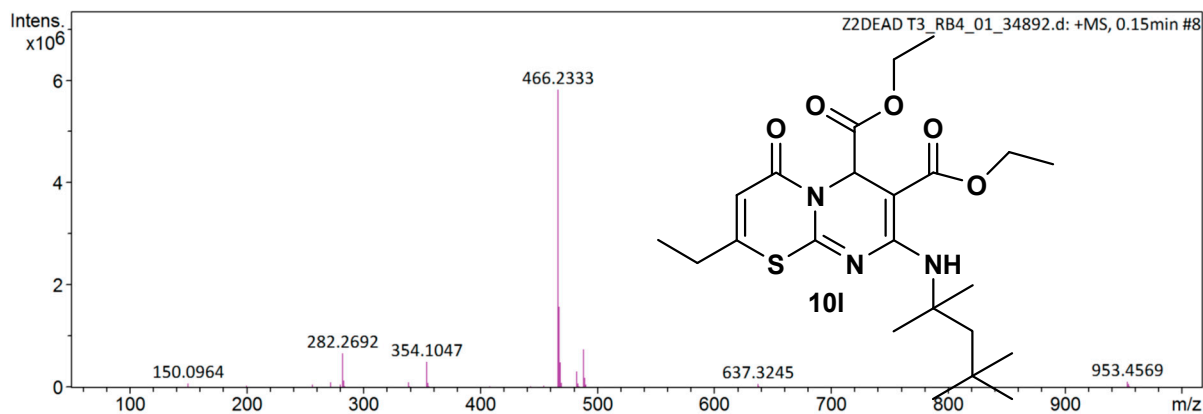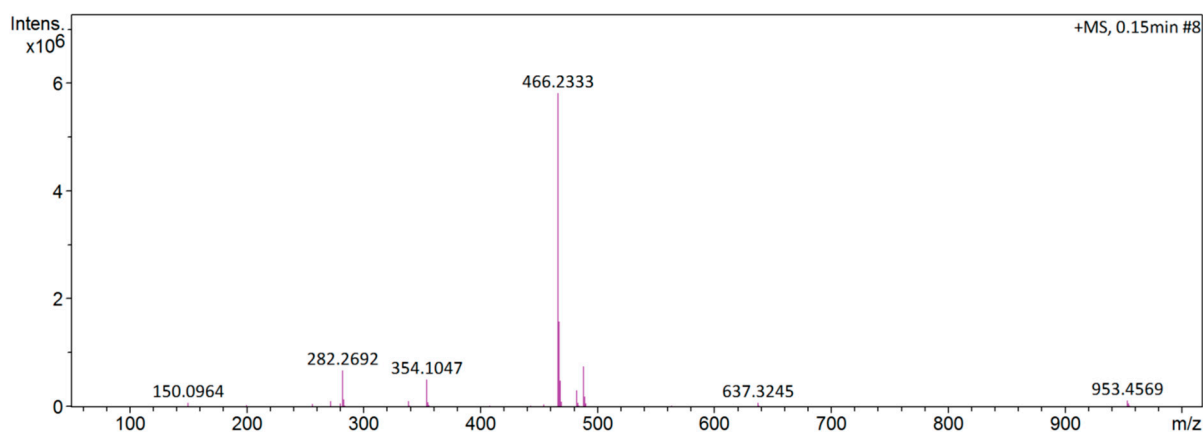

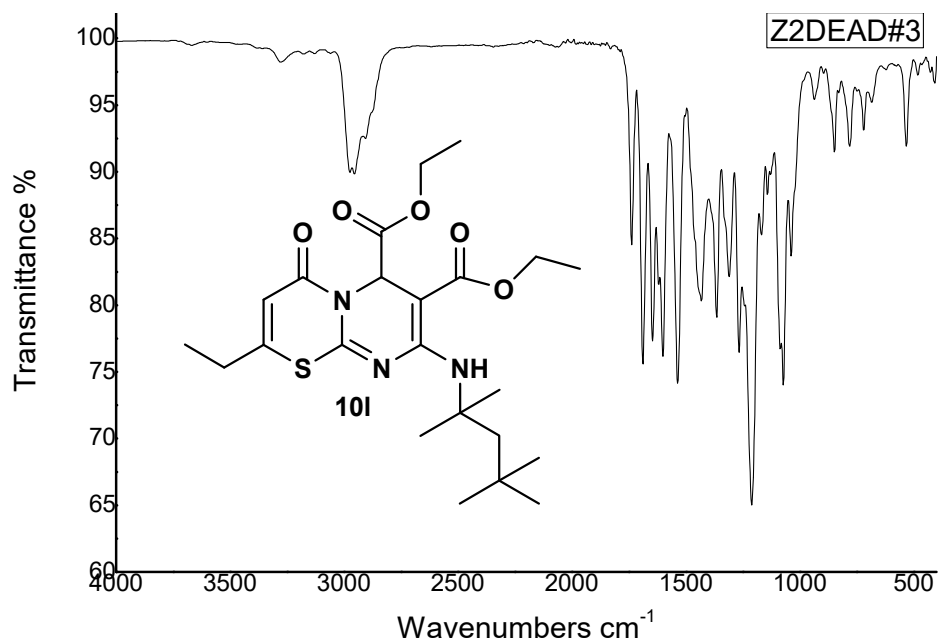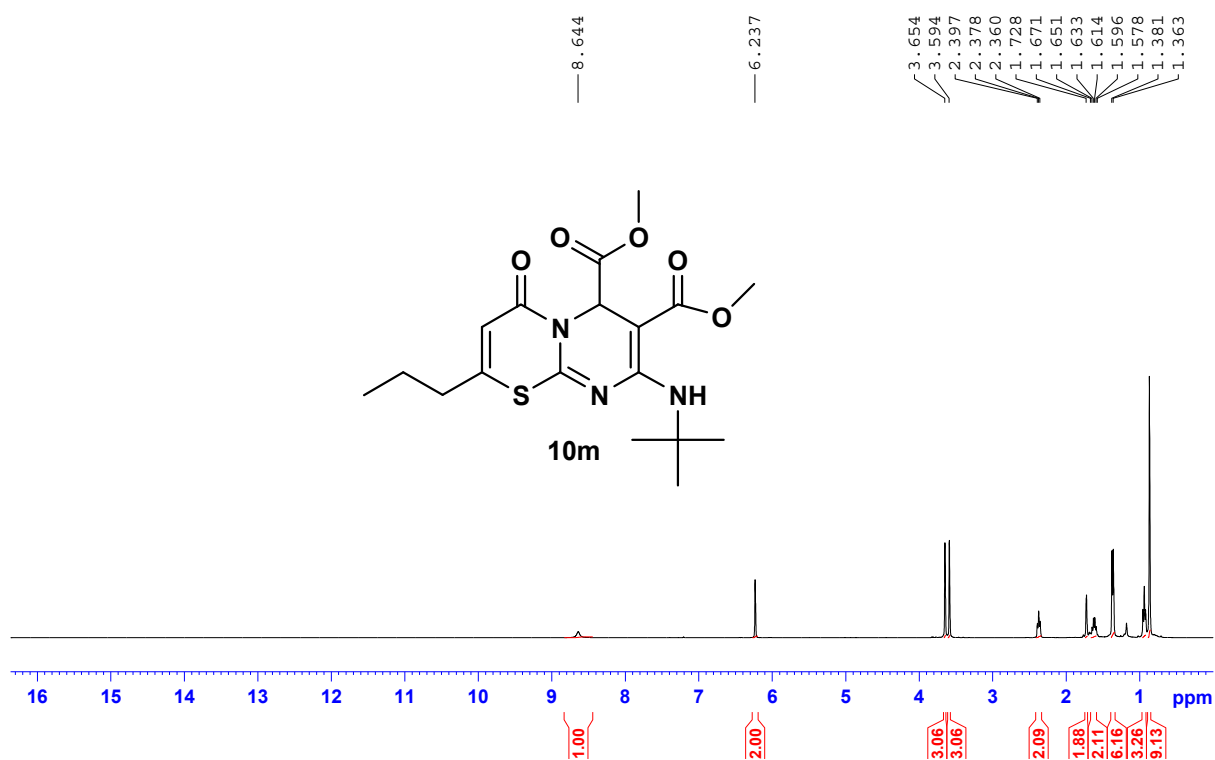

171.07  
168.44  
161.34  
157.99  
155.29  
154.41

115.12

77.47  
77.15  
76.84  
72.00

52.87  
52.55  
51.09  
50.73

37.99

30.79

21.58

13.40

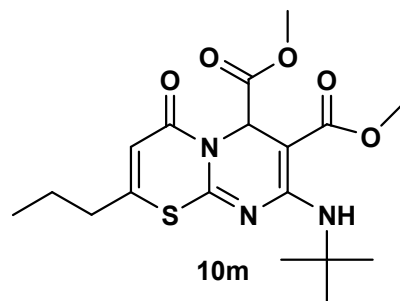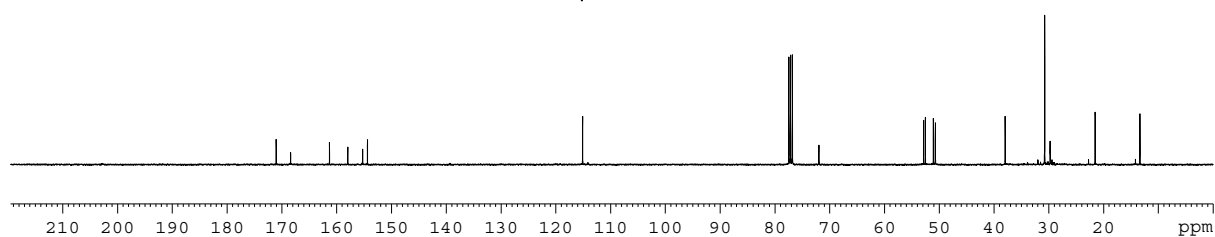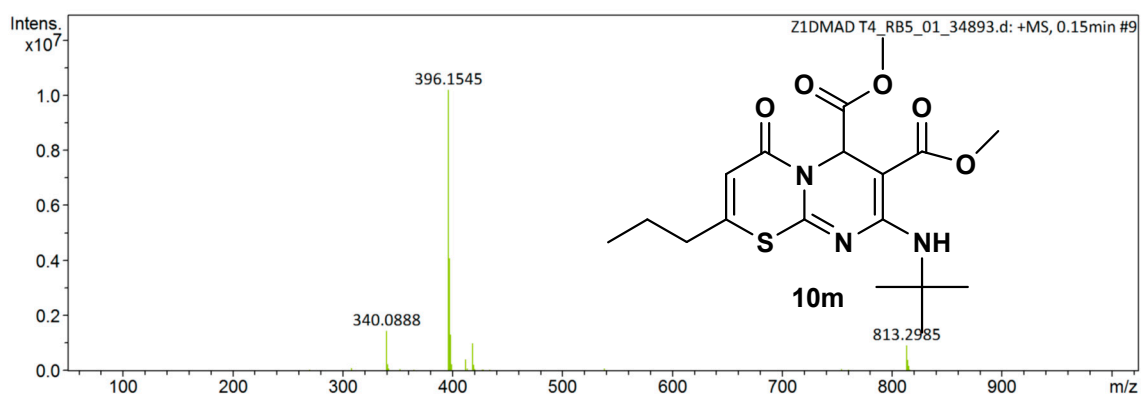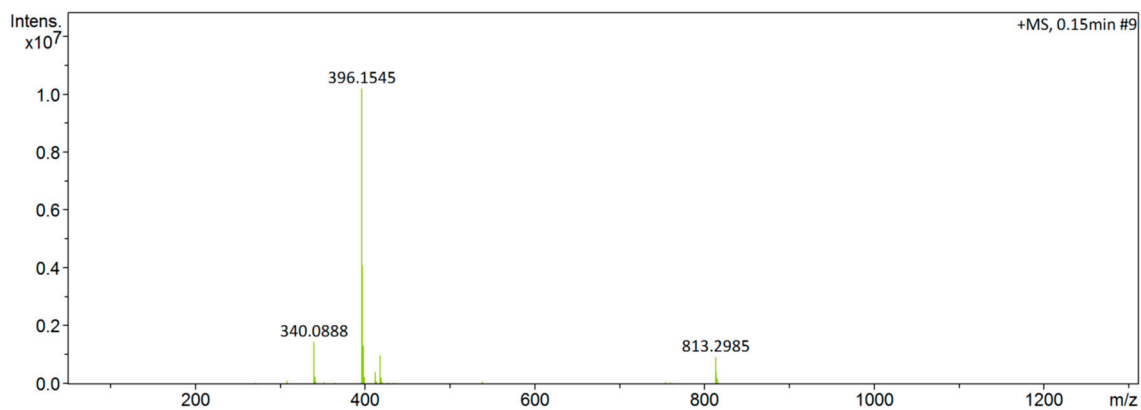

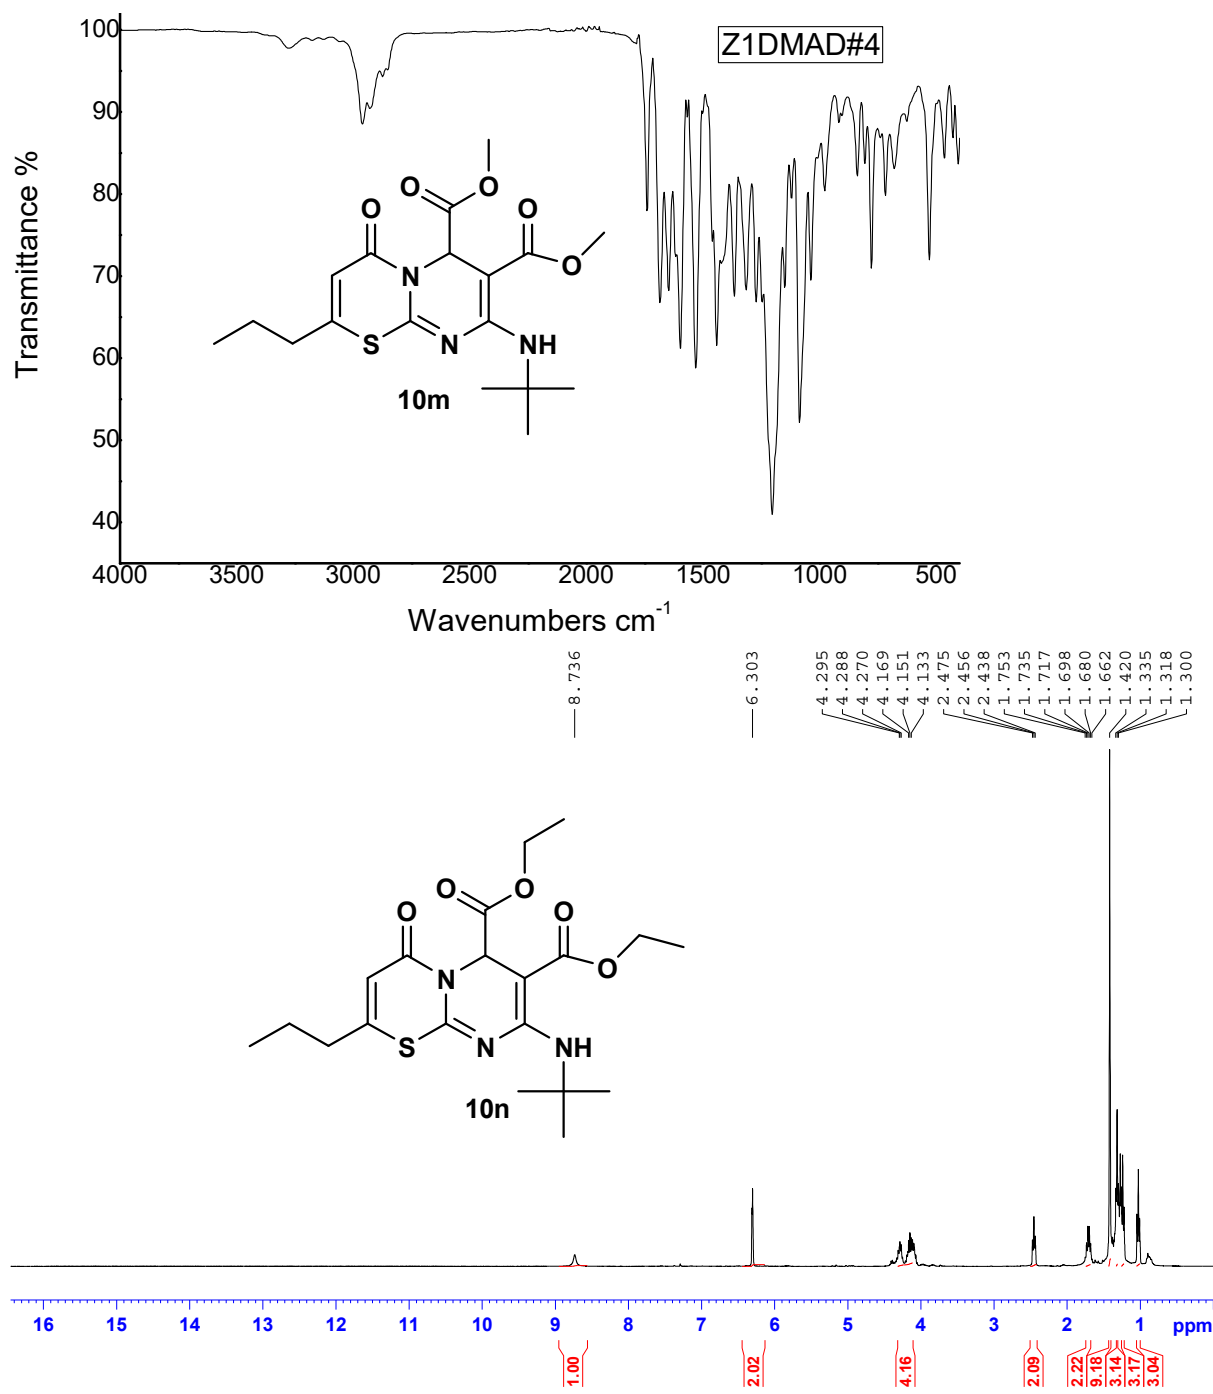

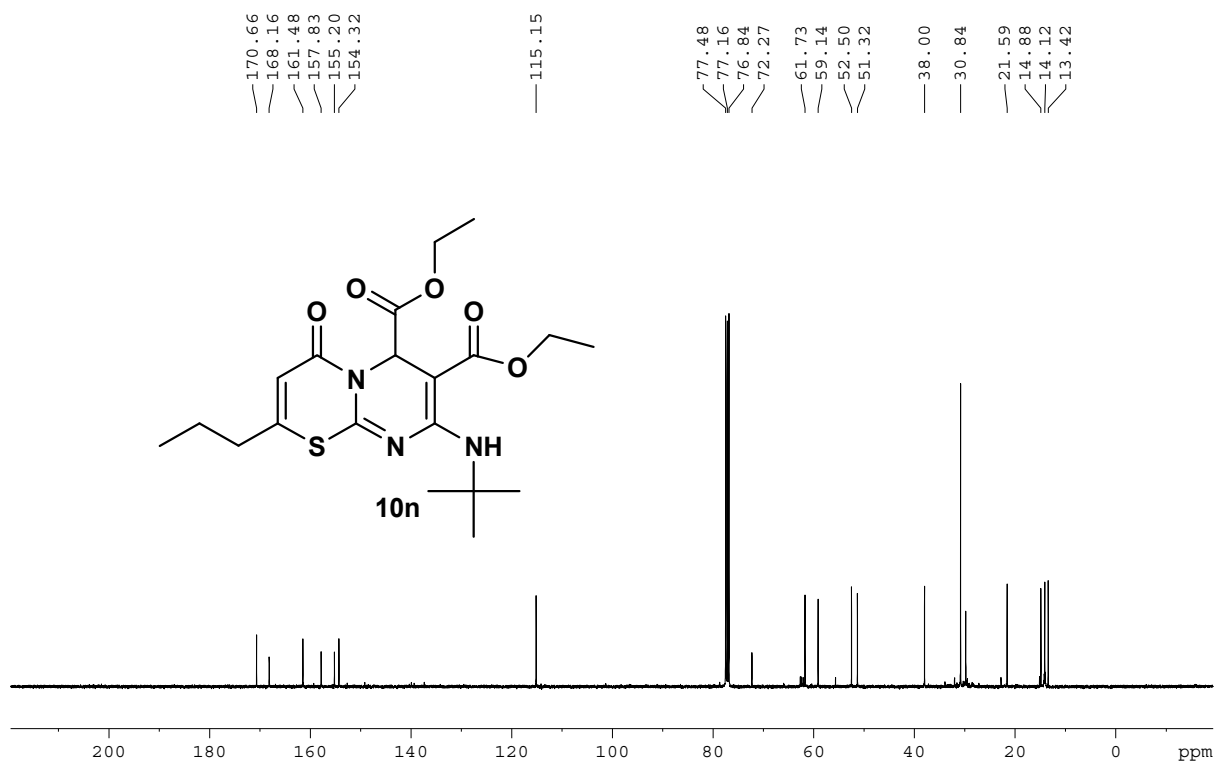

S

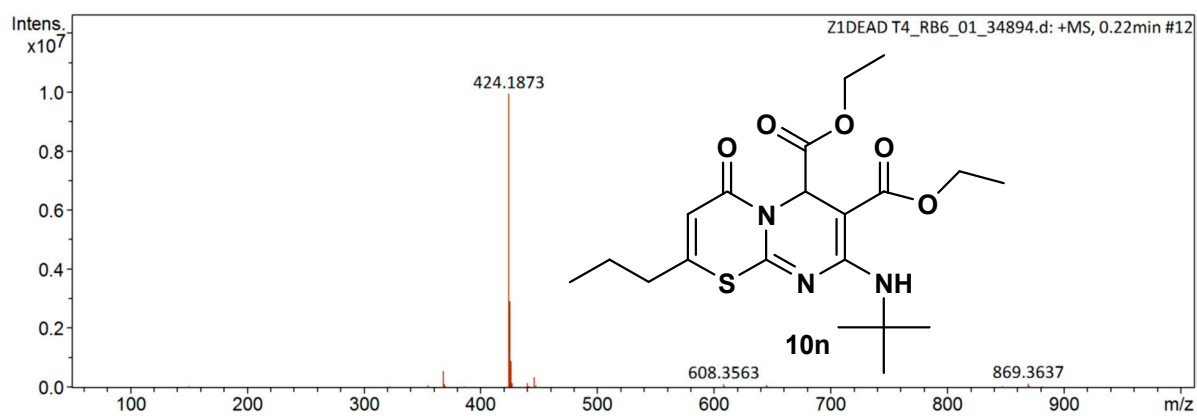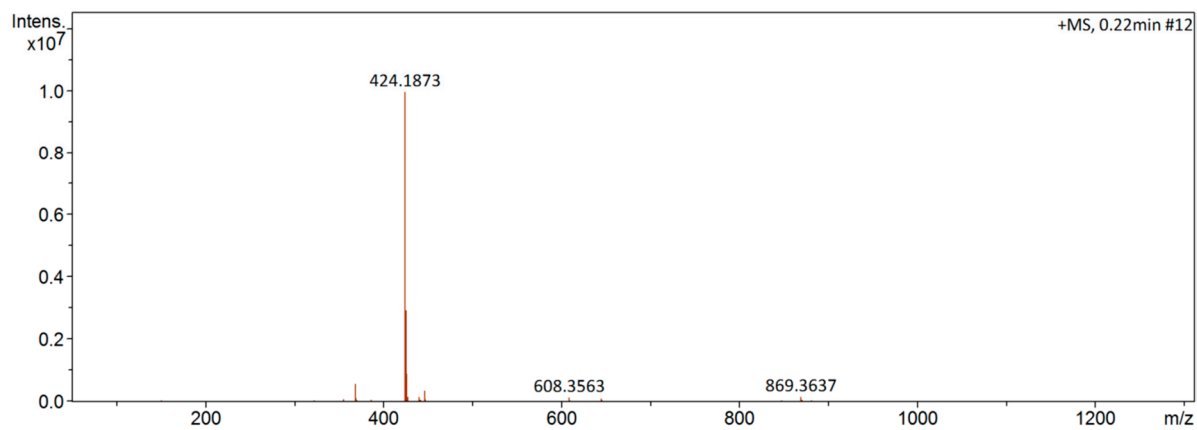

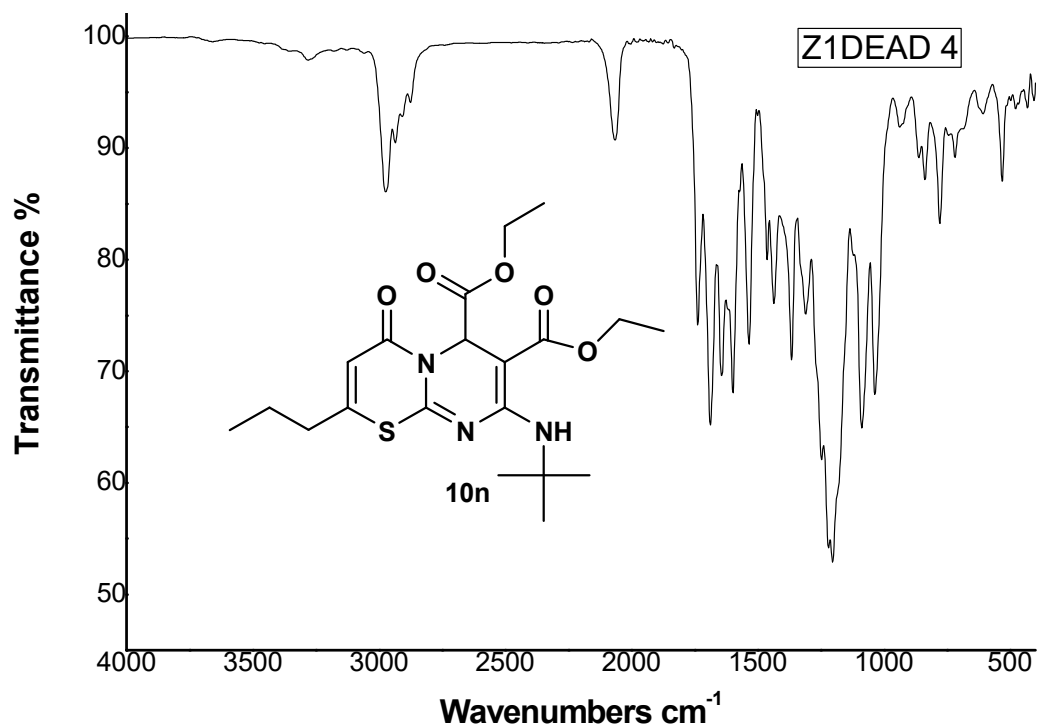

— 8.644

— 6.237

3.654  
3.594  
2.397  
2.378  
2.360  
1.728  
1.671  
1.651  
1.633  
1.614  
1.596  
1.578  
1.381  
1.363  
0.960  
0.942  
0.924  
0.872

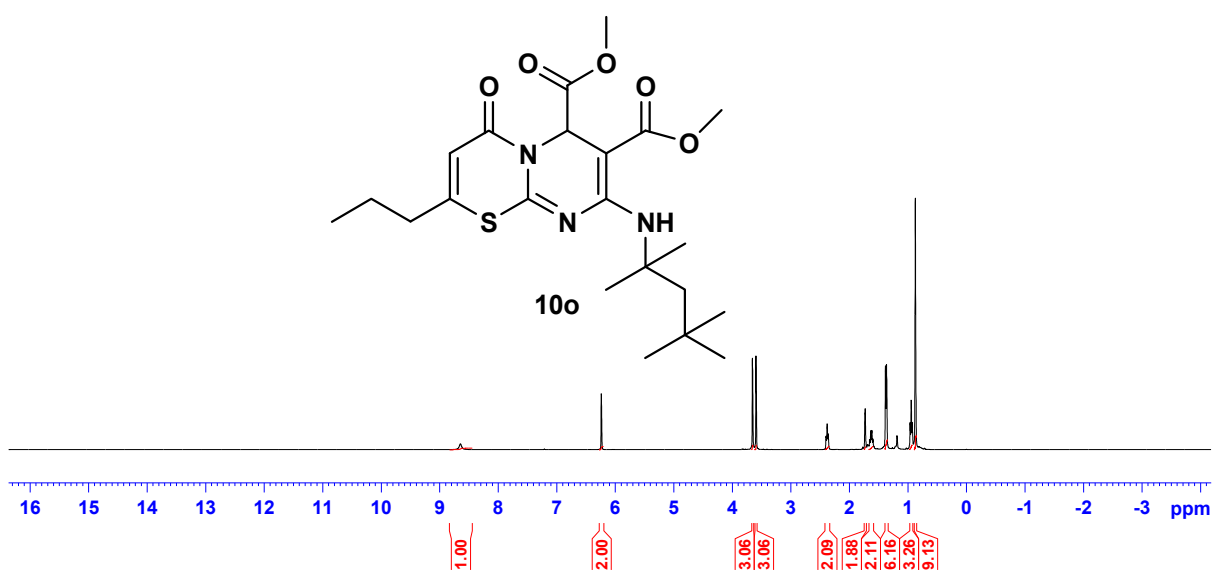

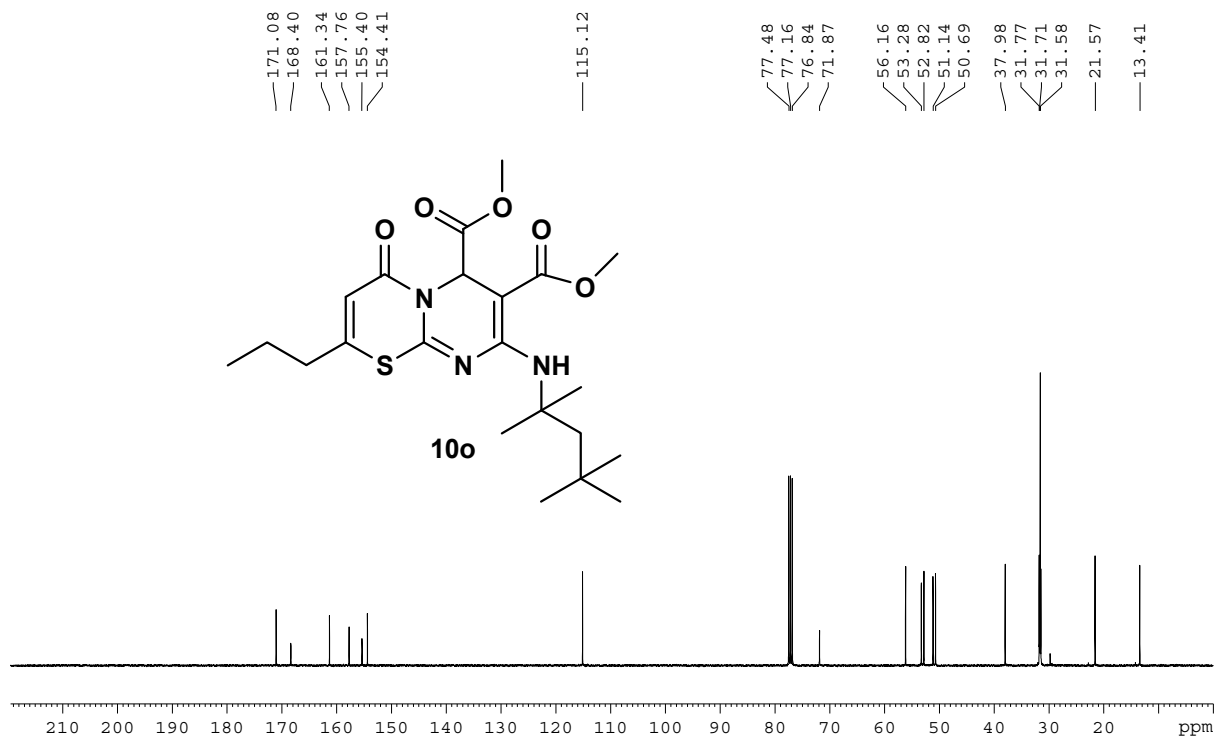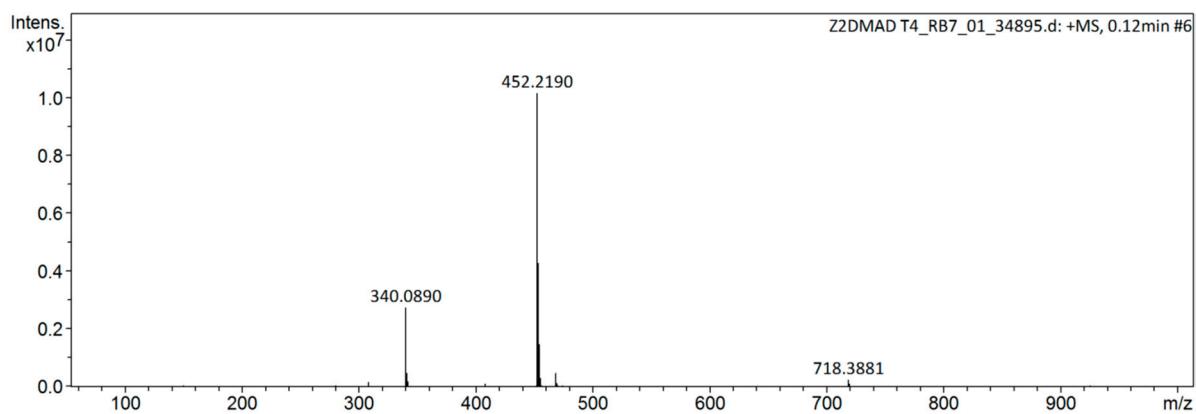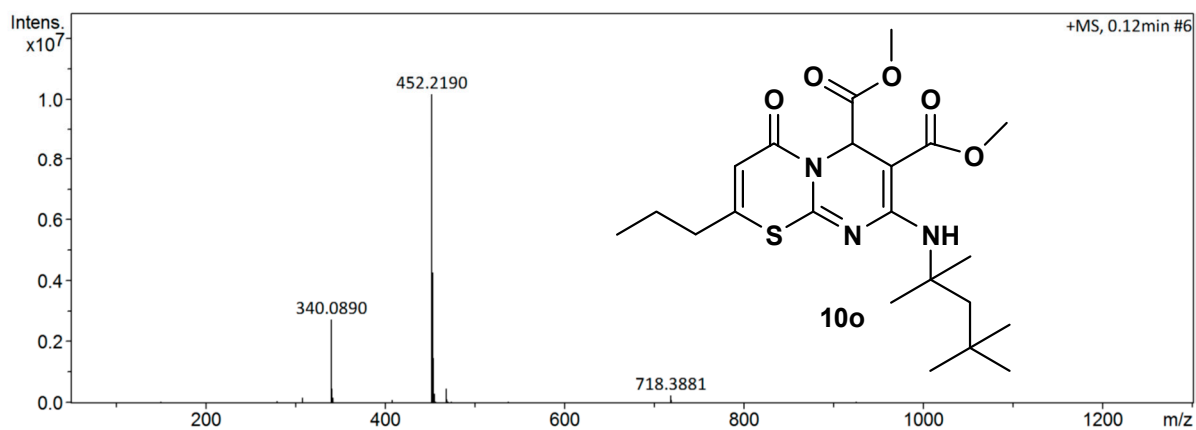

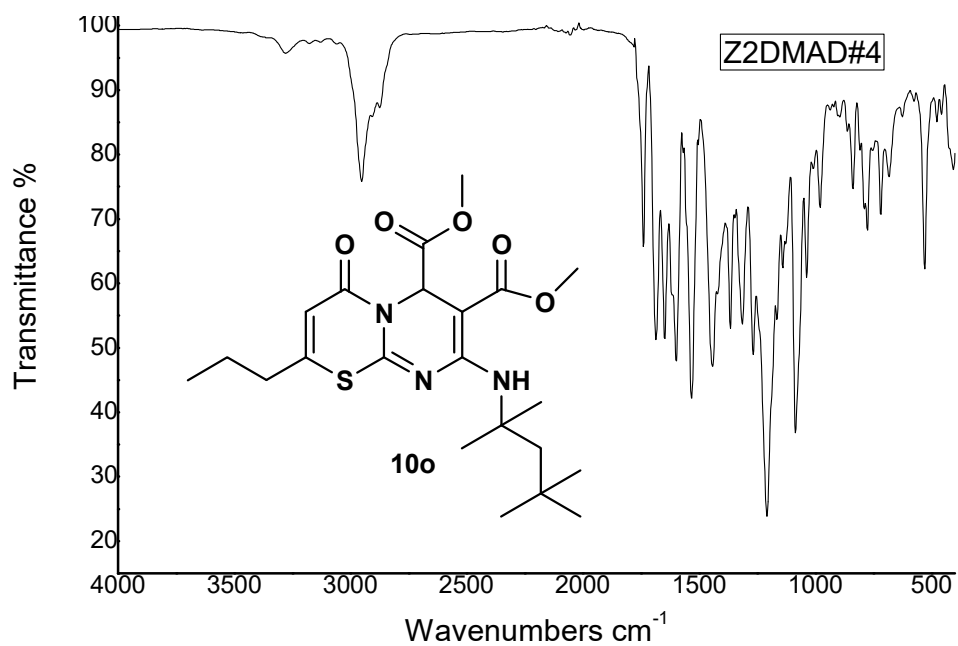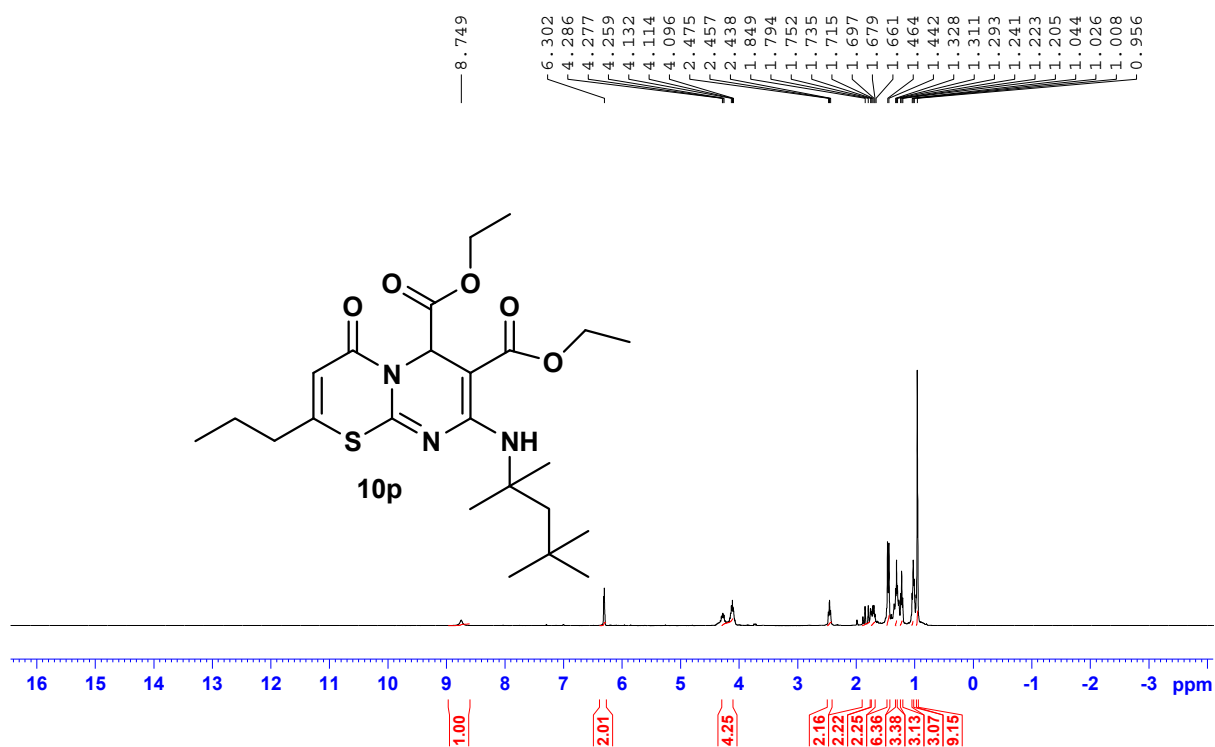





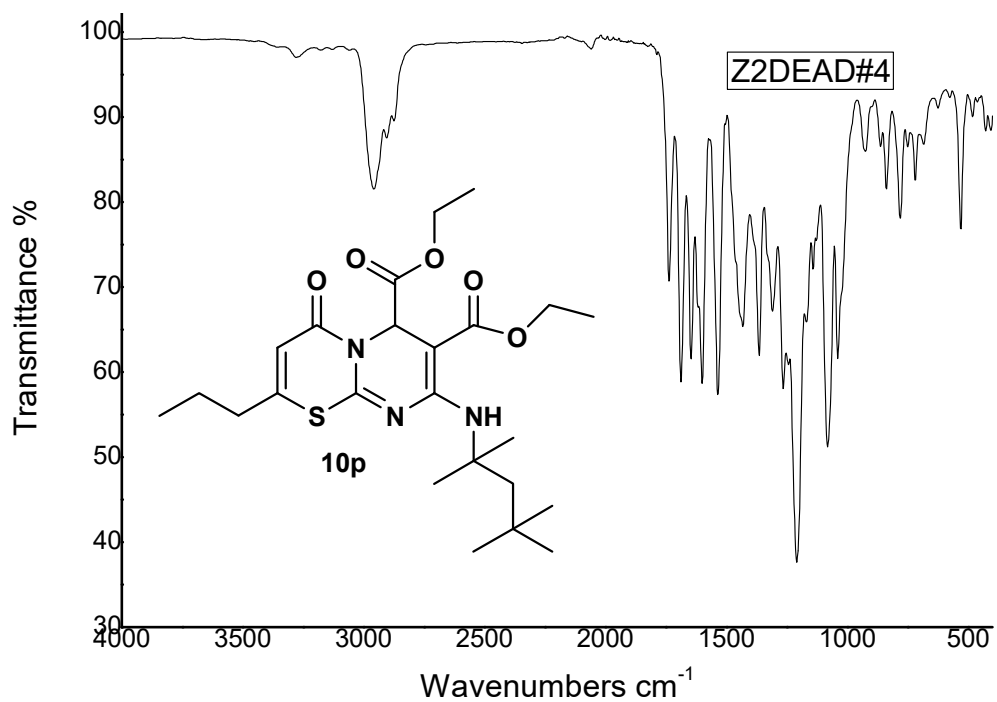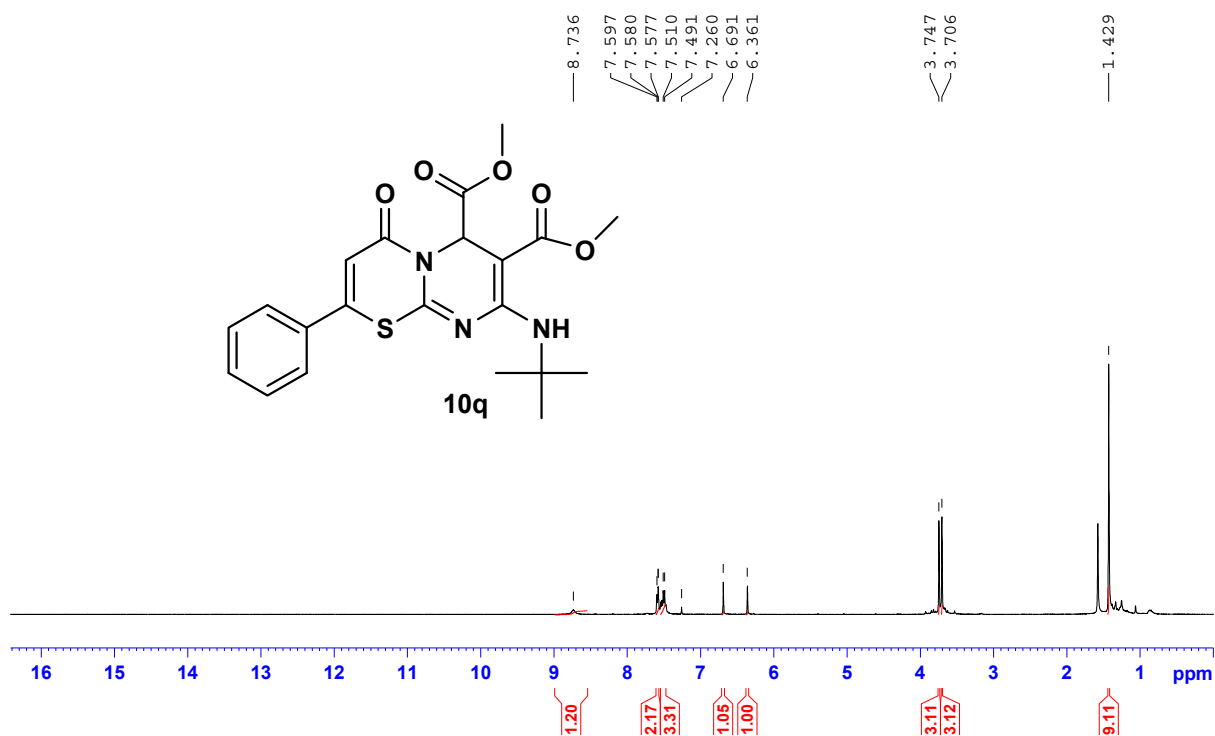

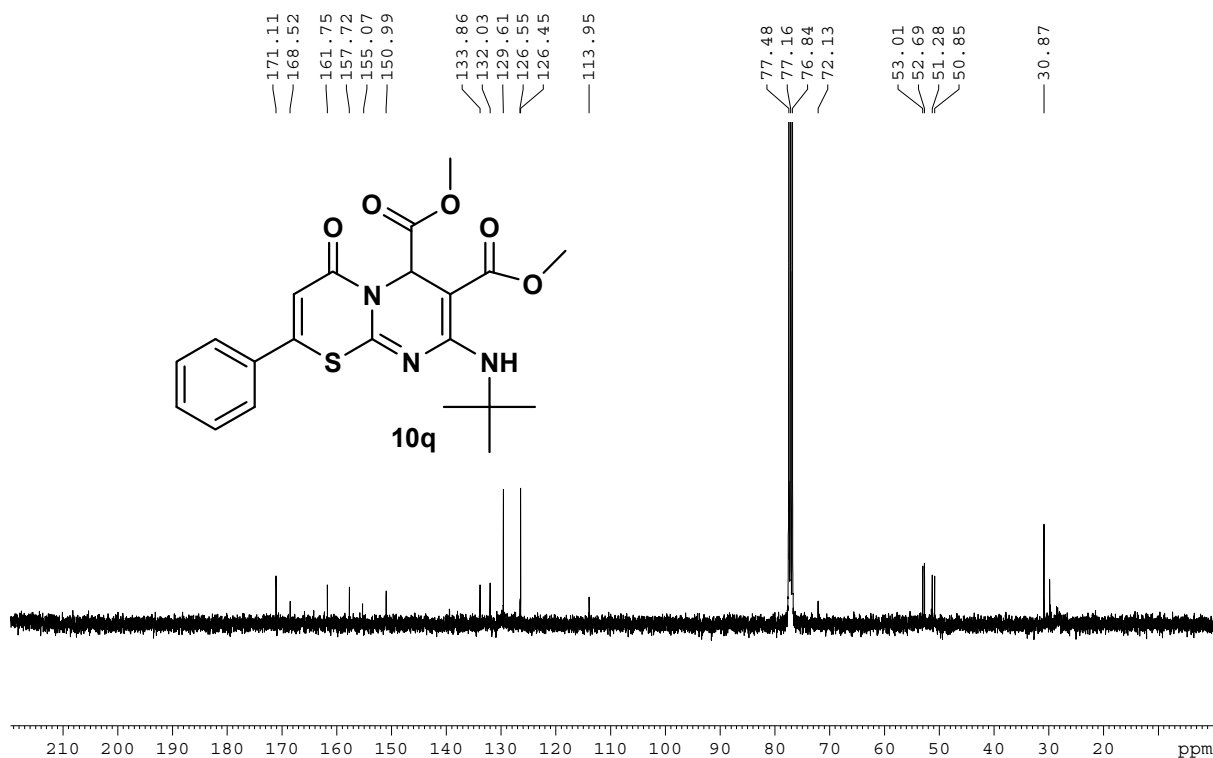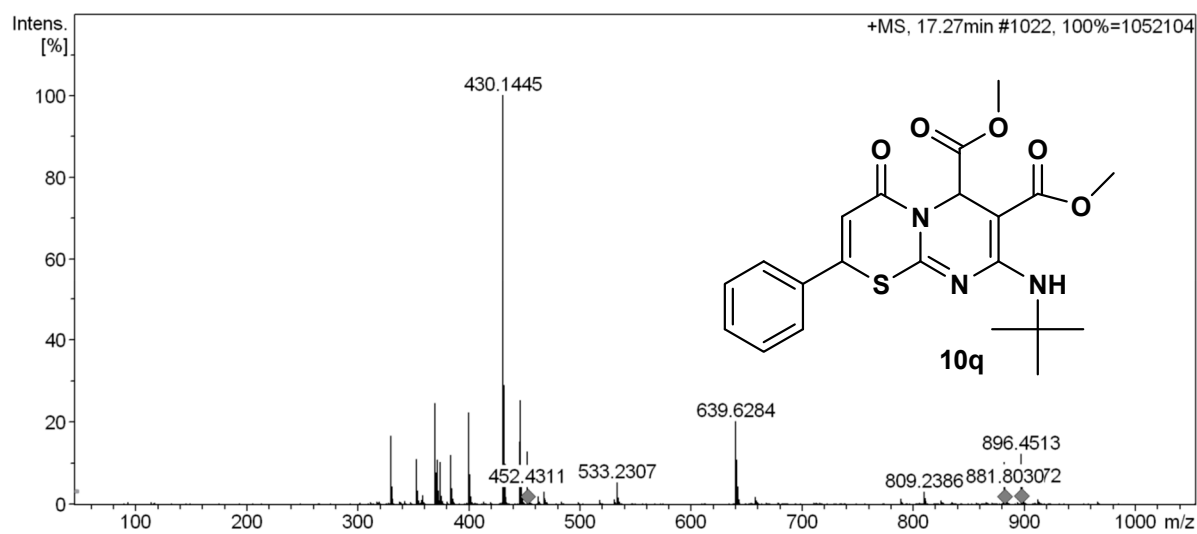

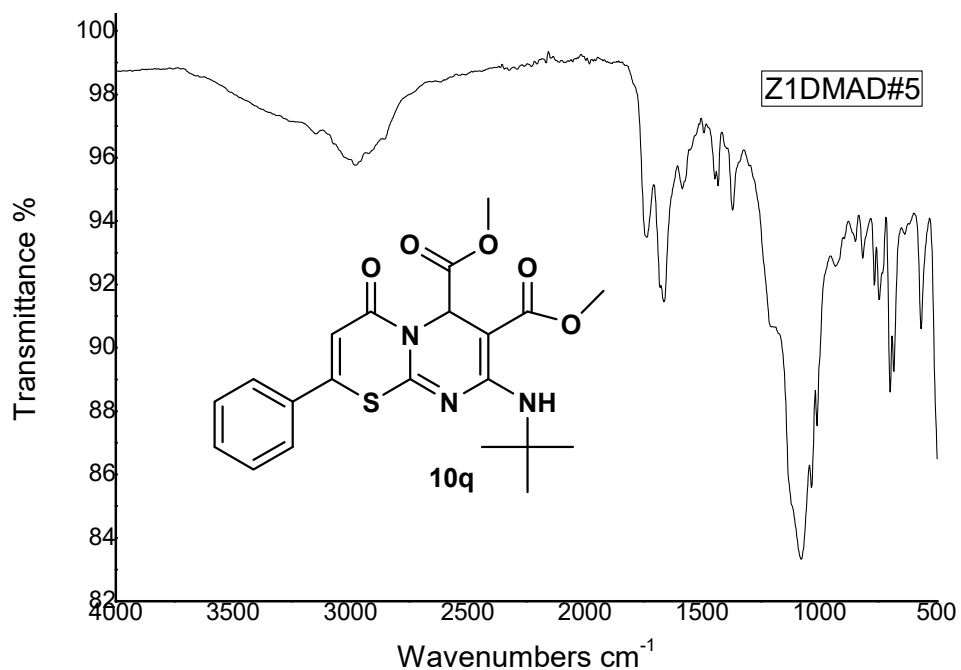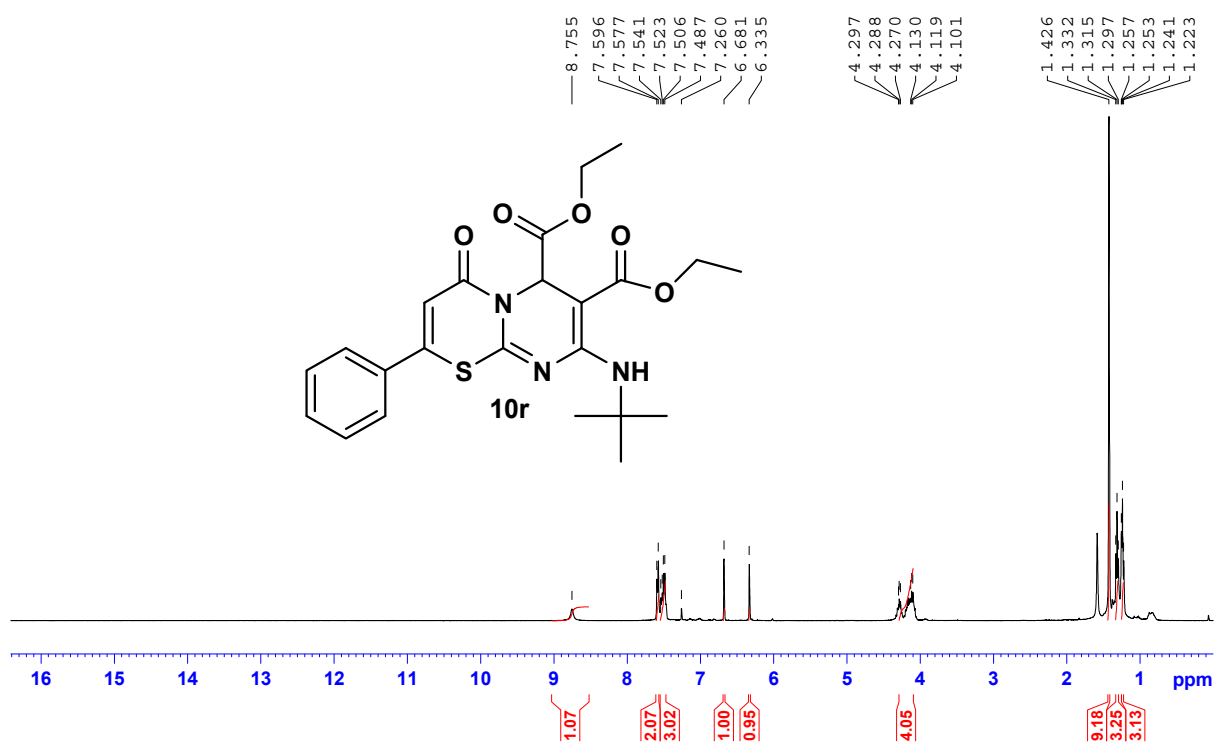

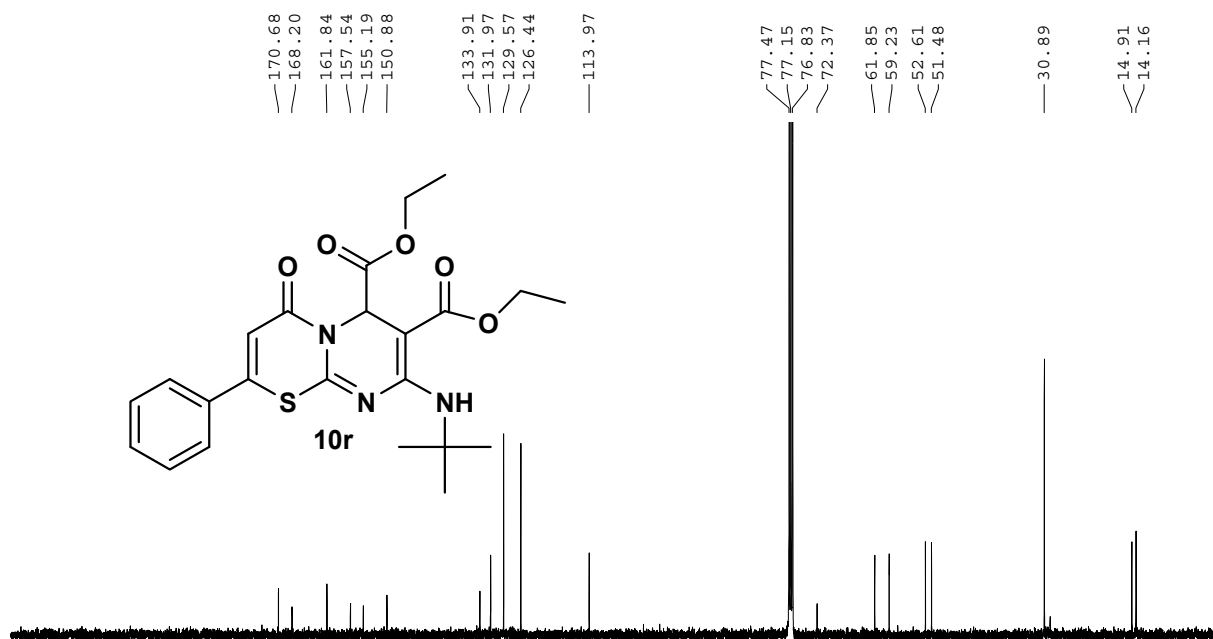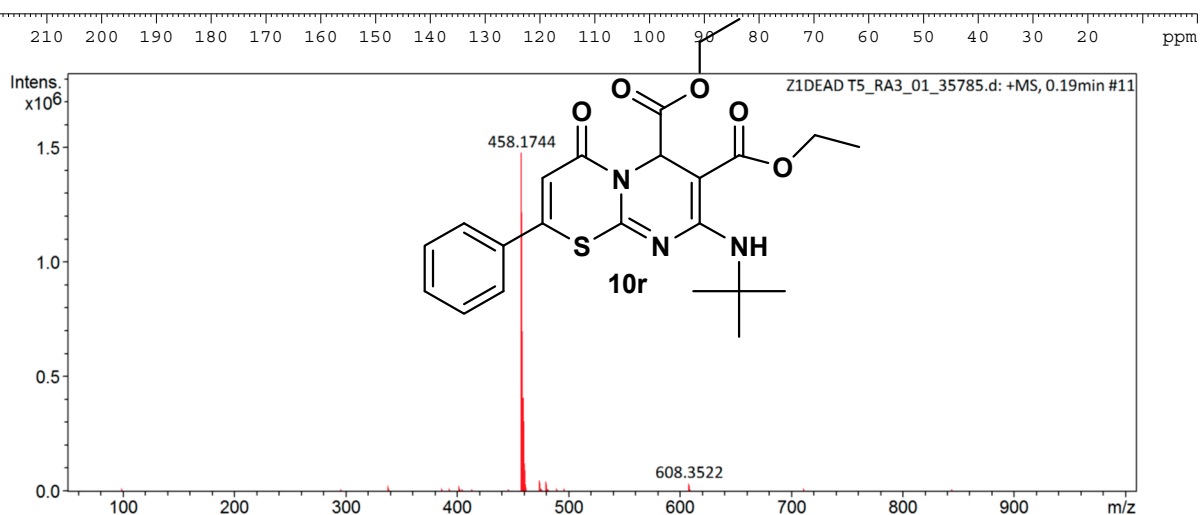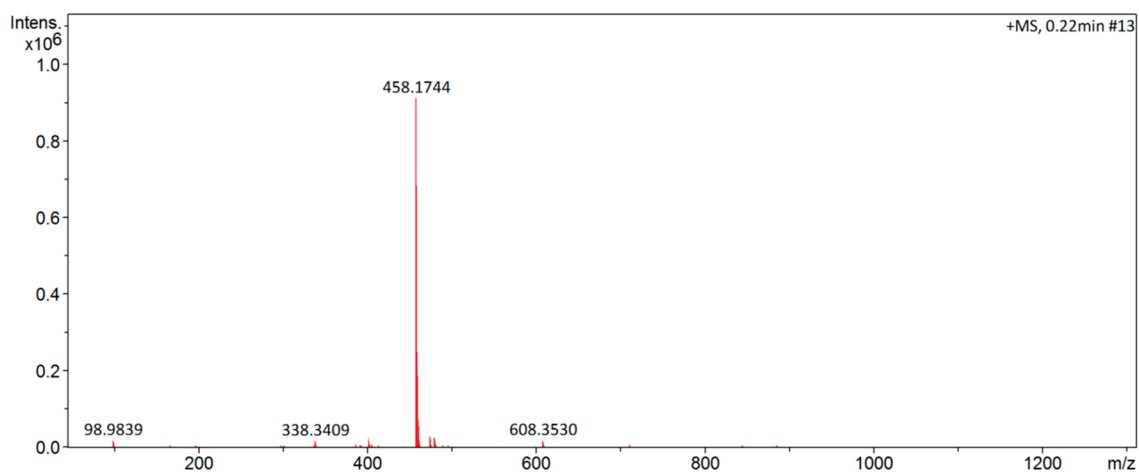

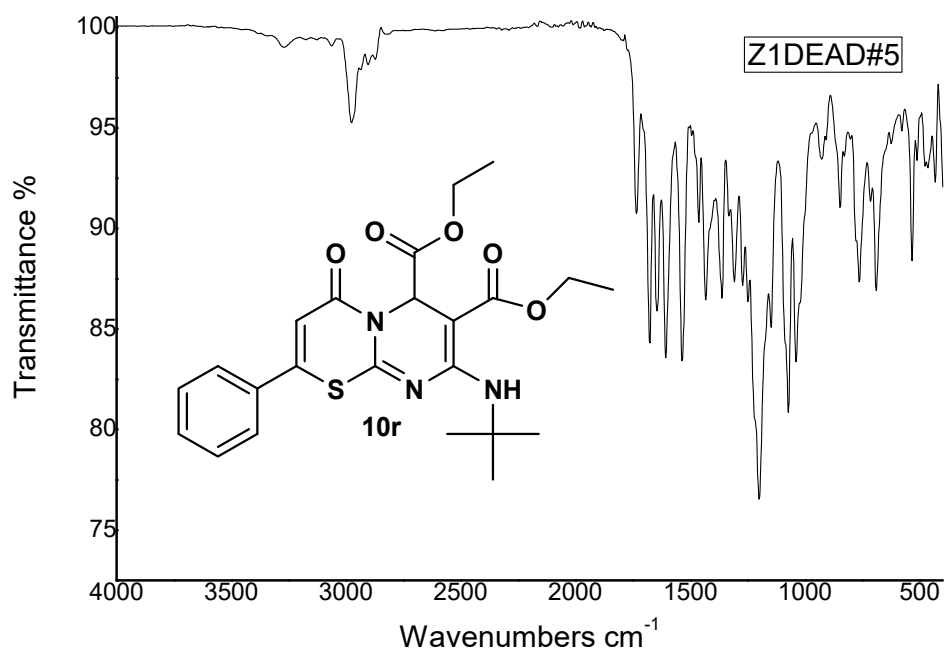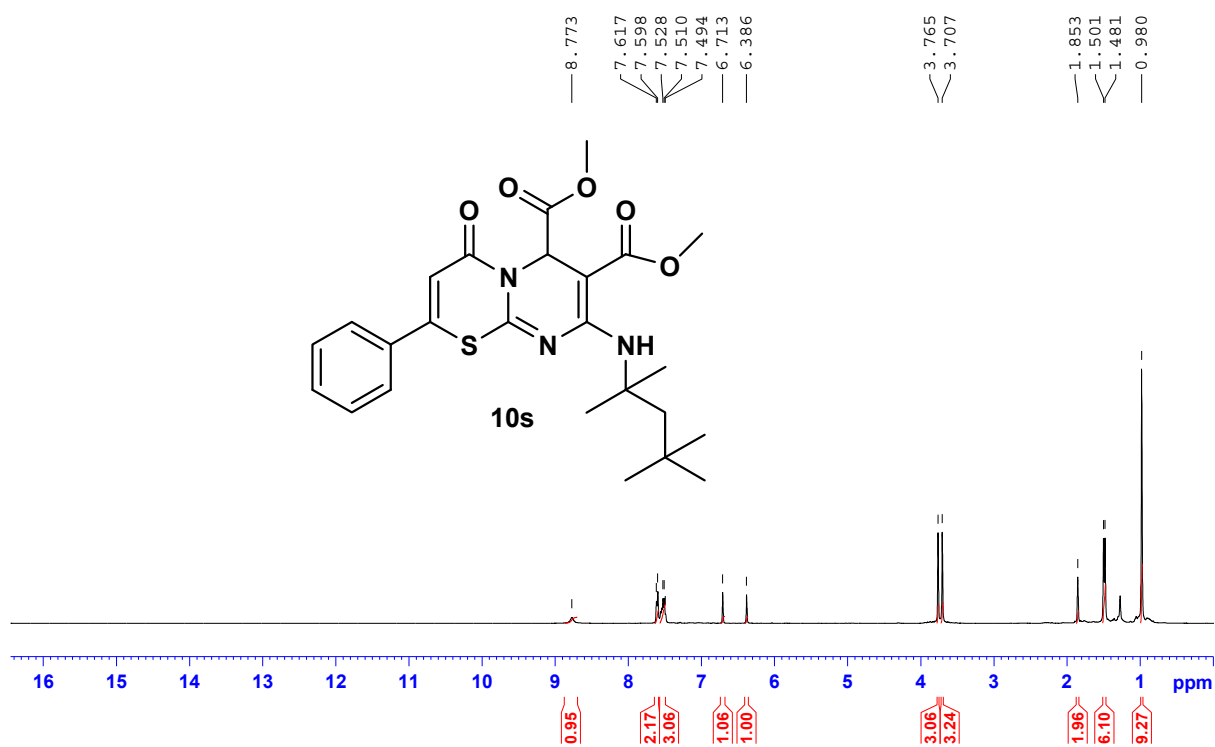

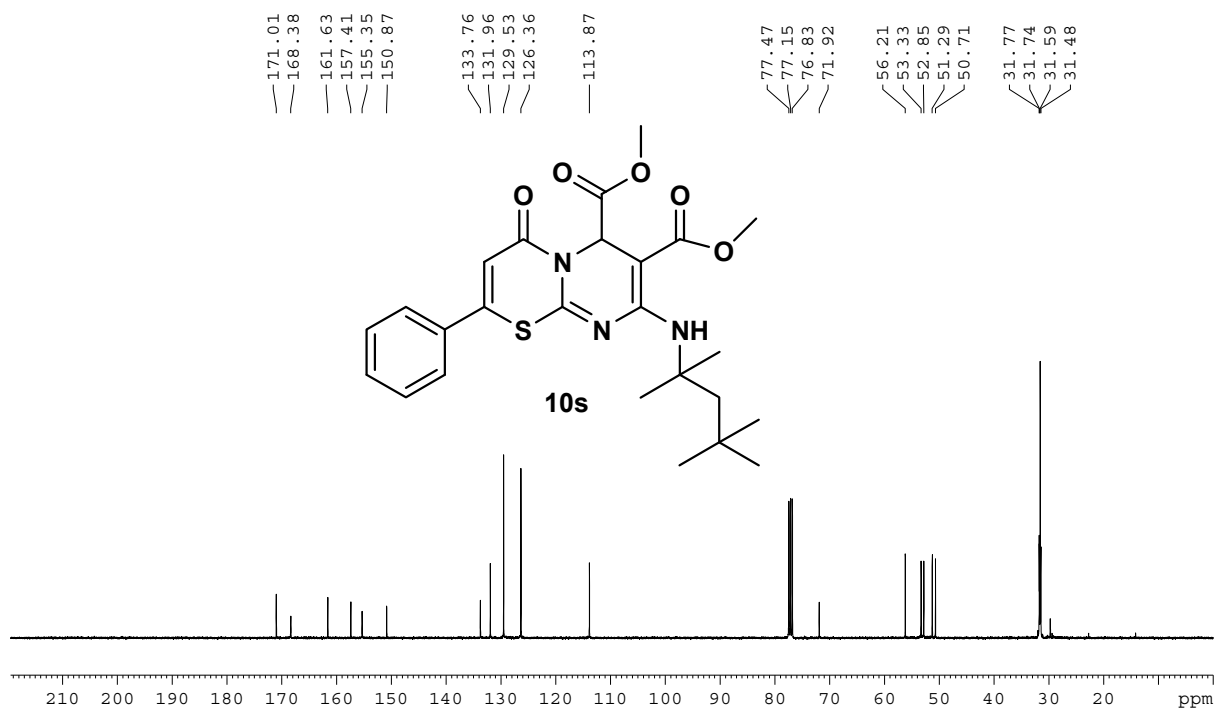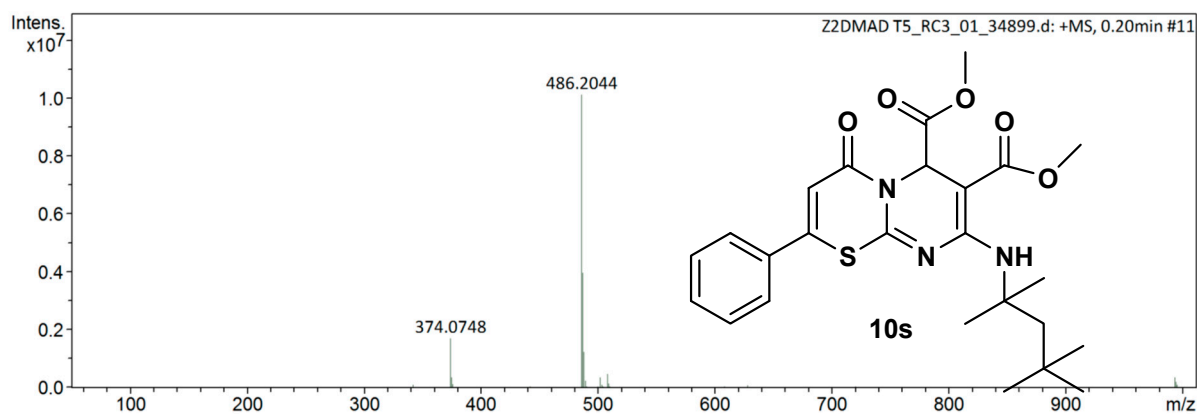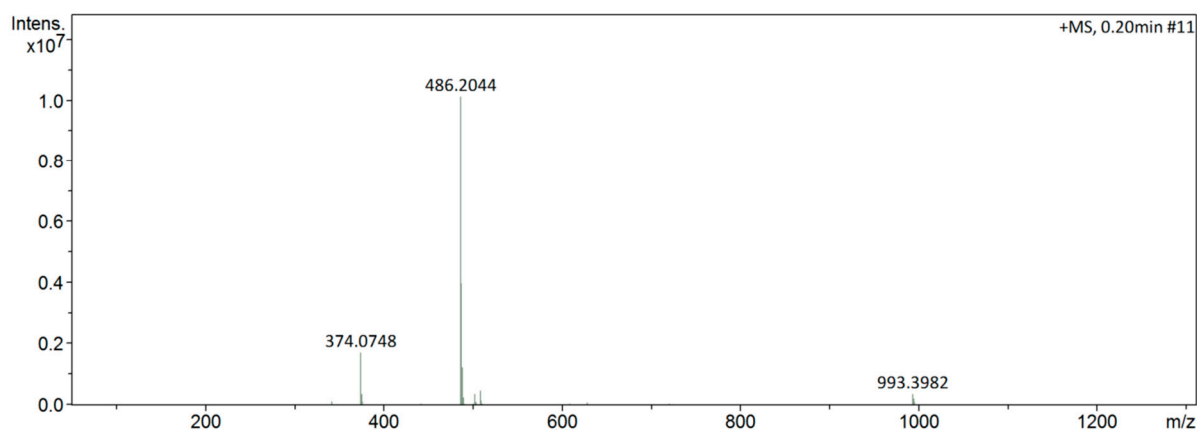

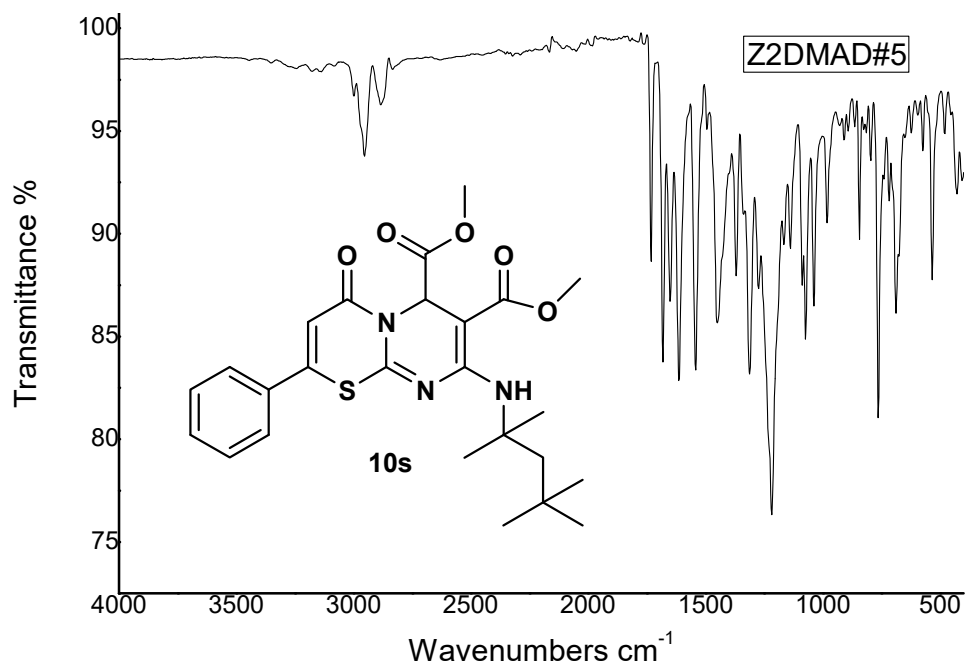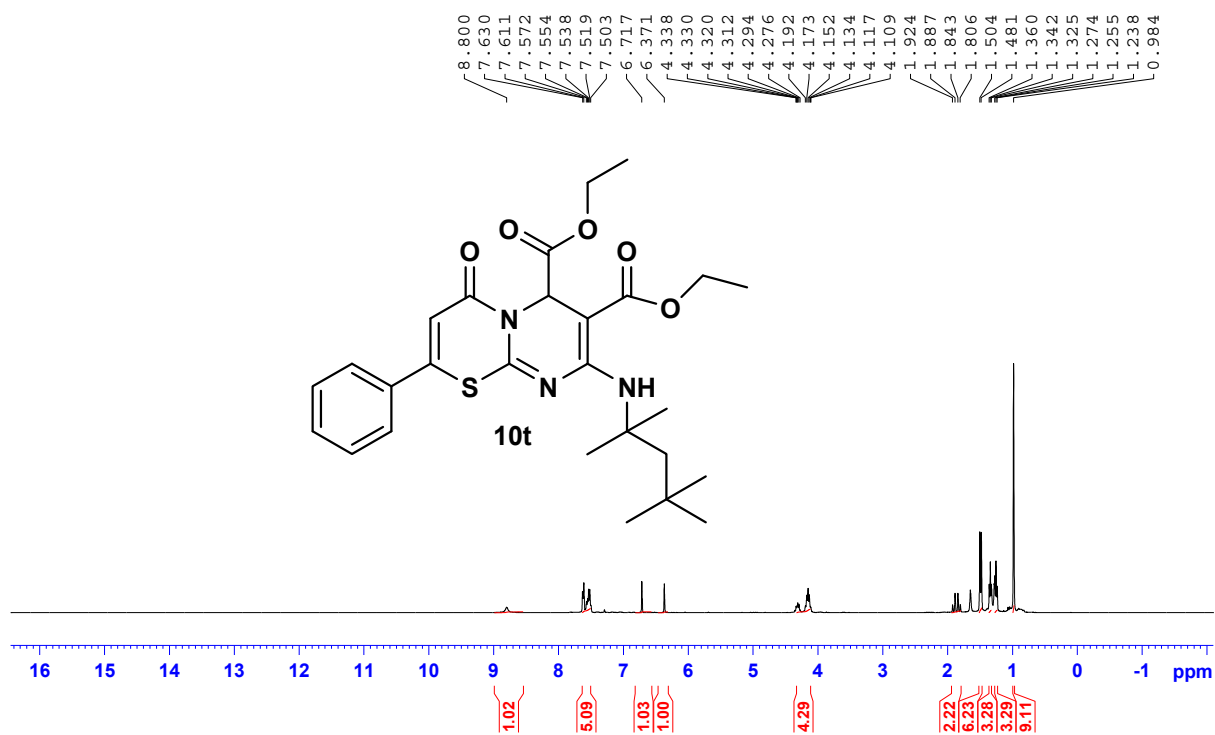



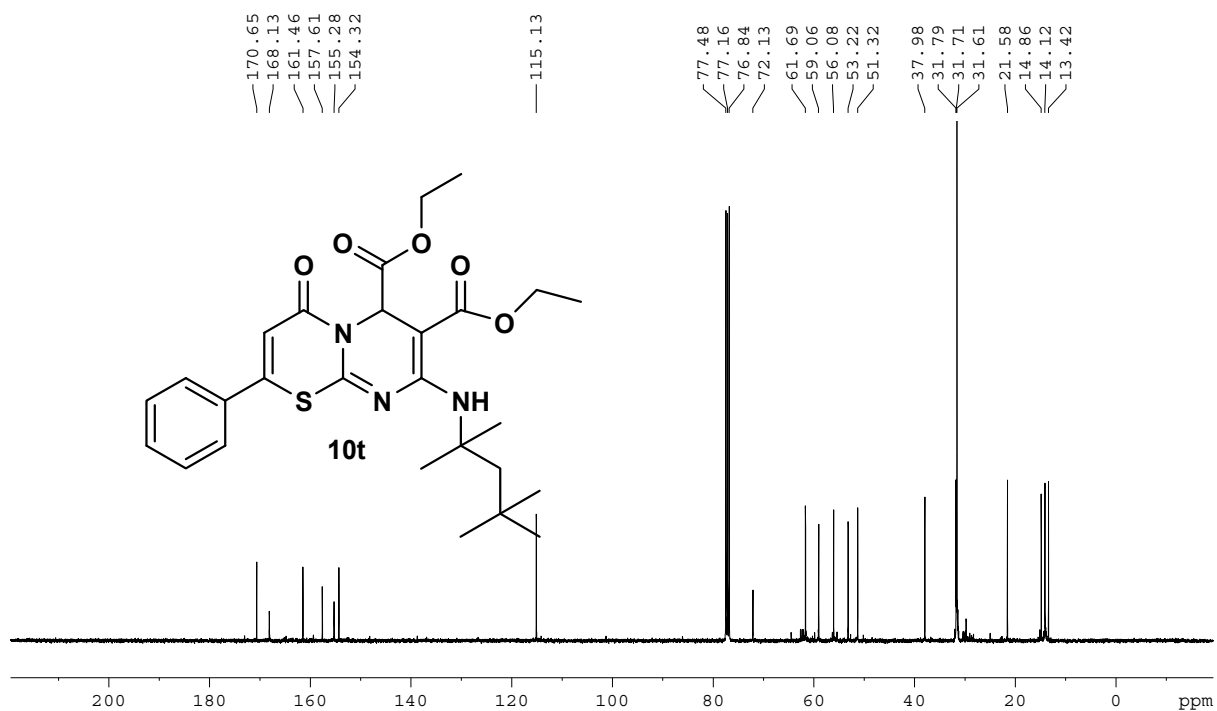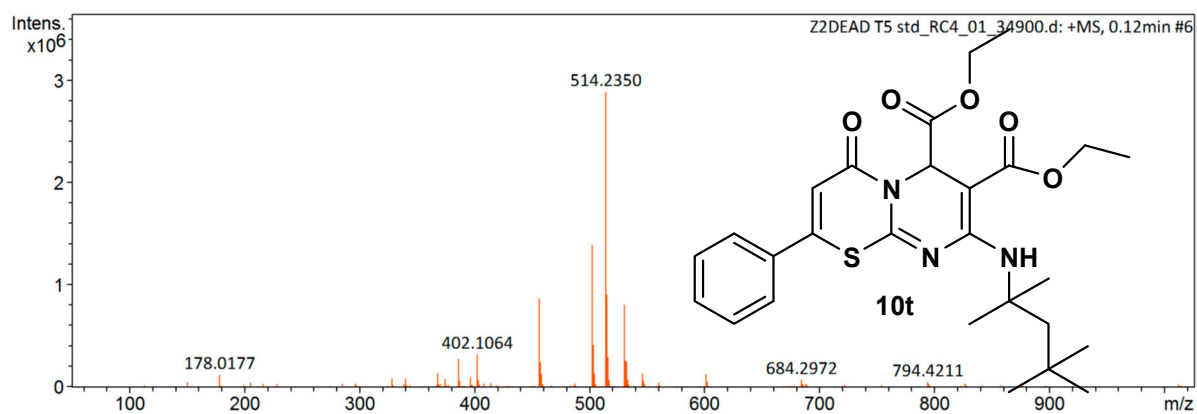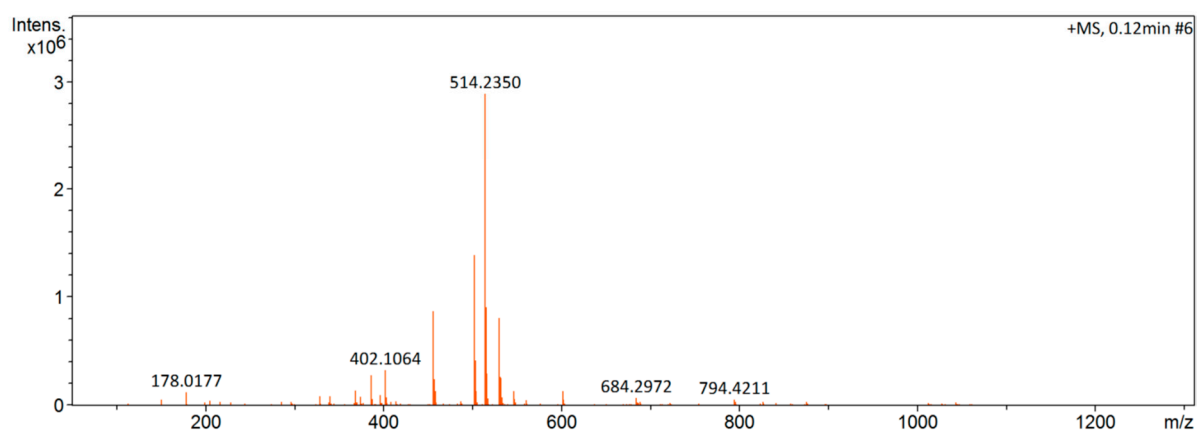

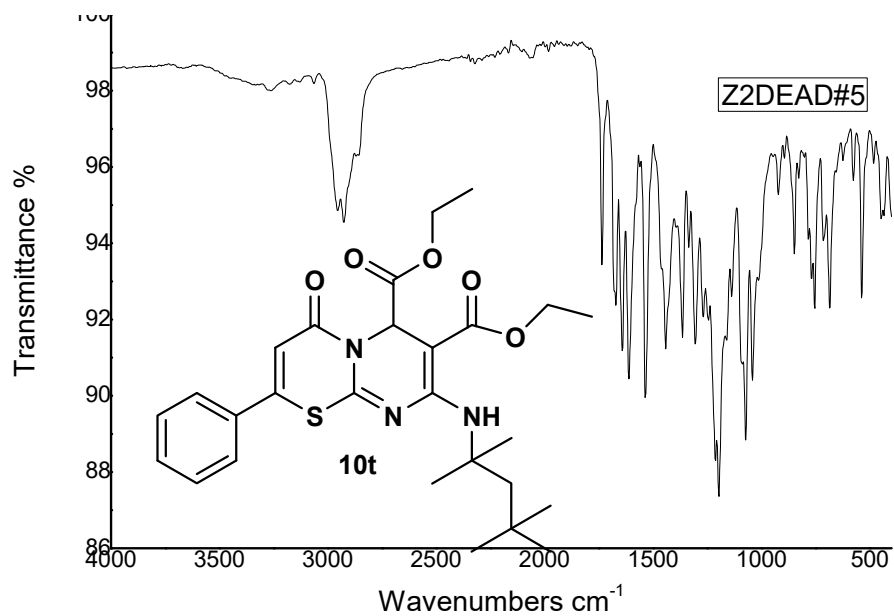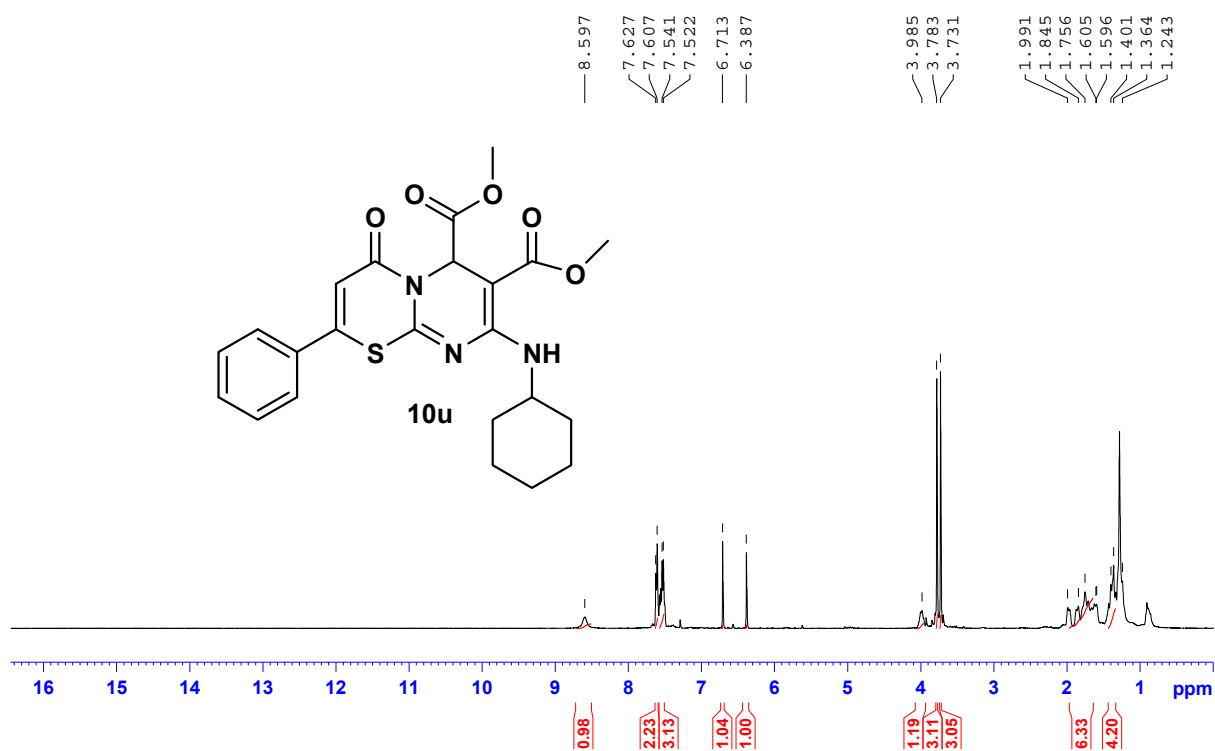

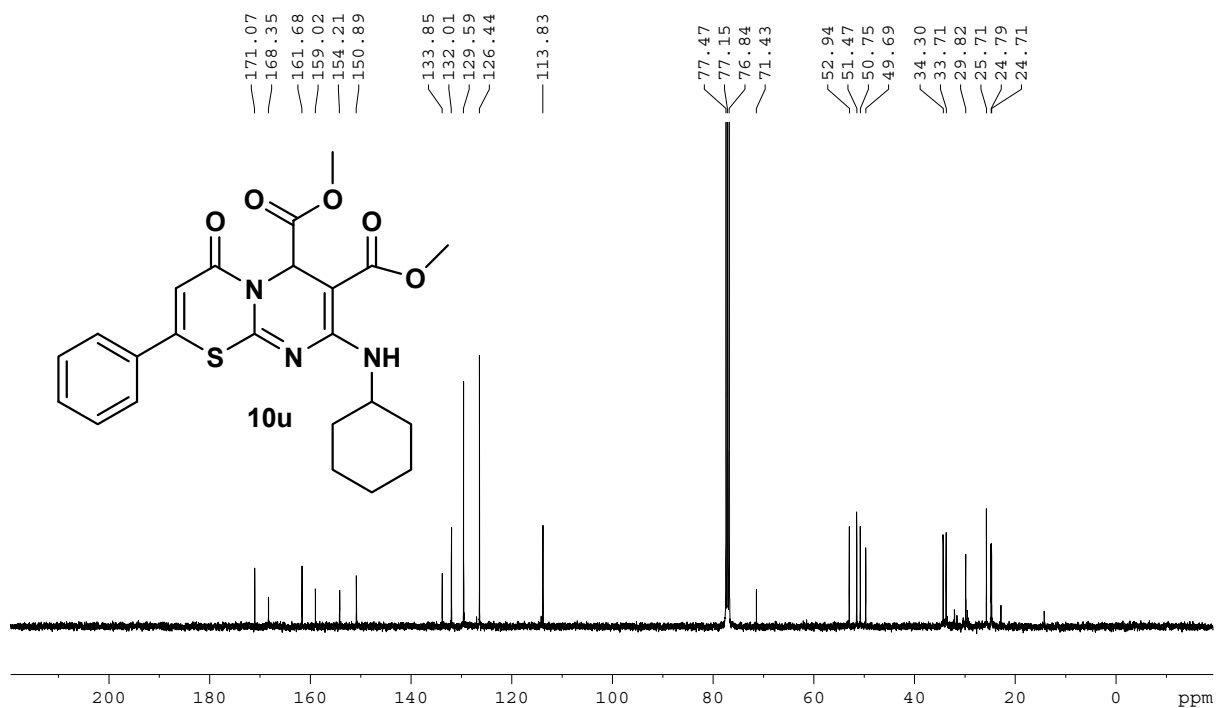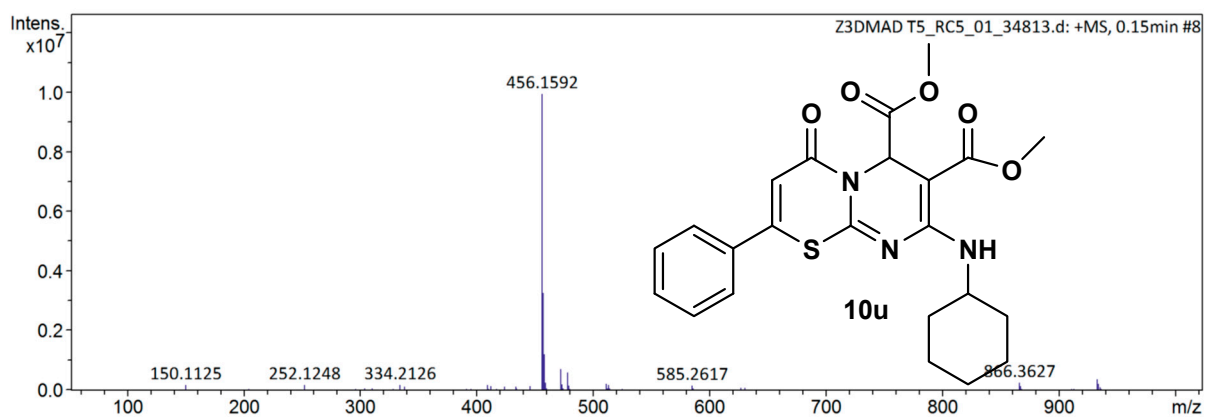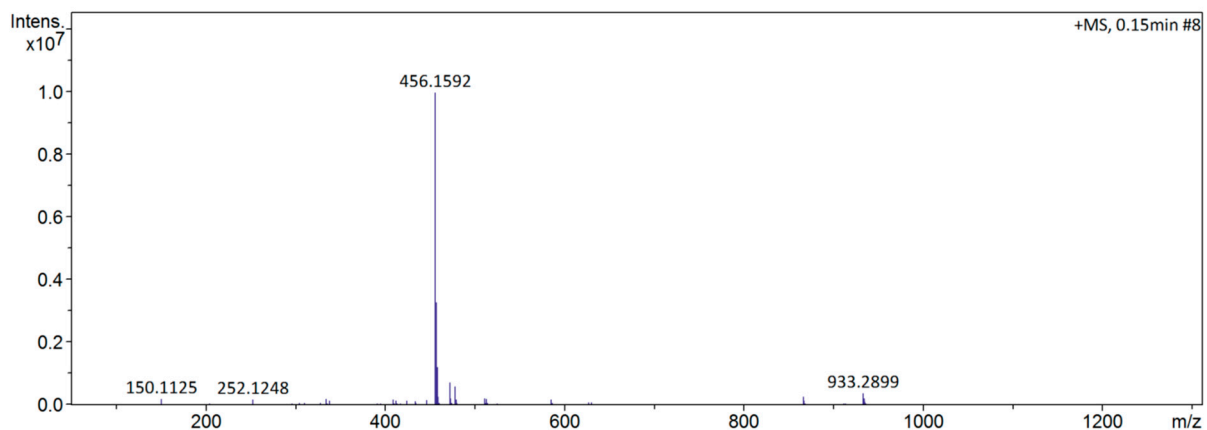

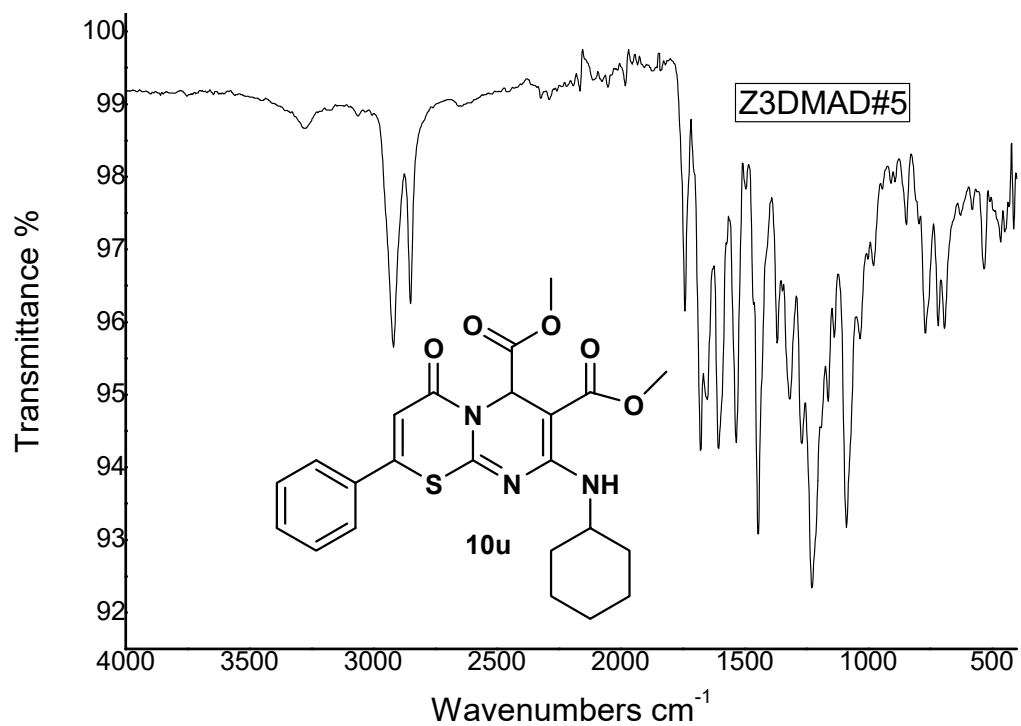

Methyl 7-oxo-7H-thiazolo[3,2-a]pyrimidine-5-carboxylate derivatives and their analogs.

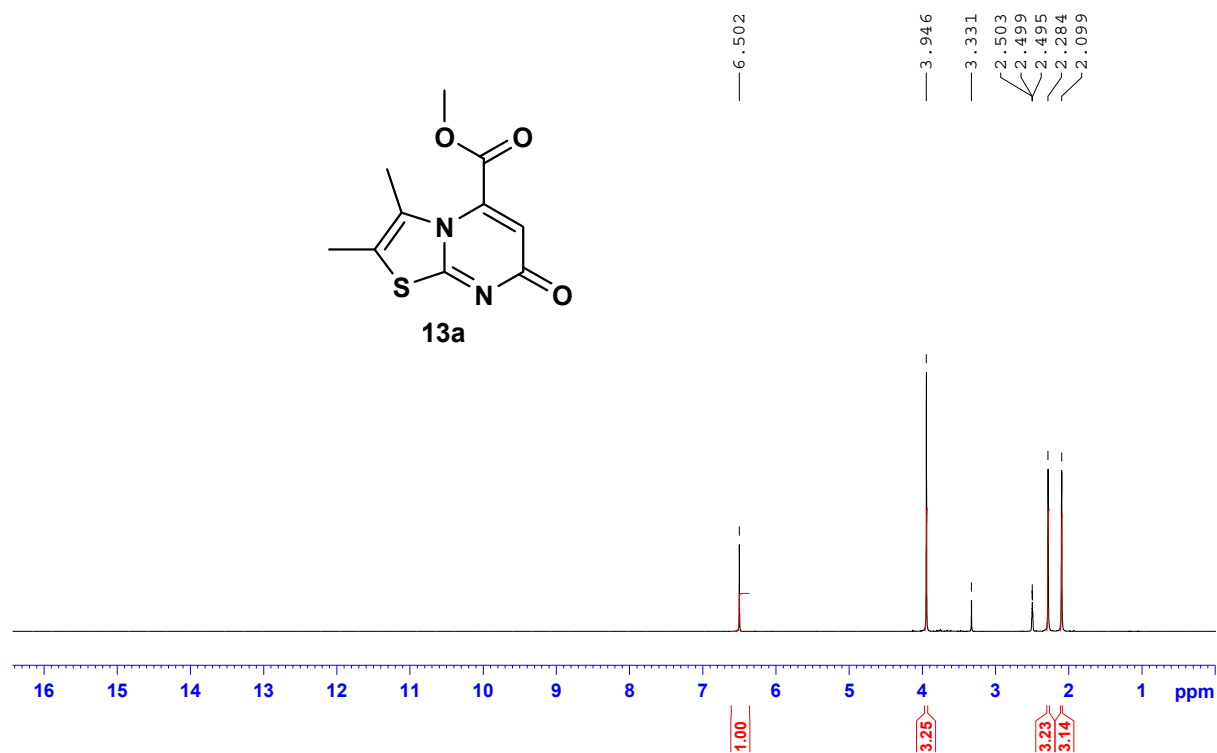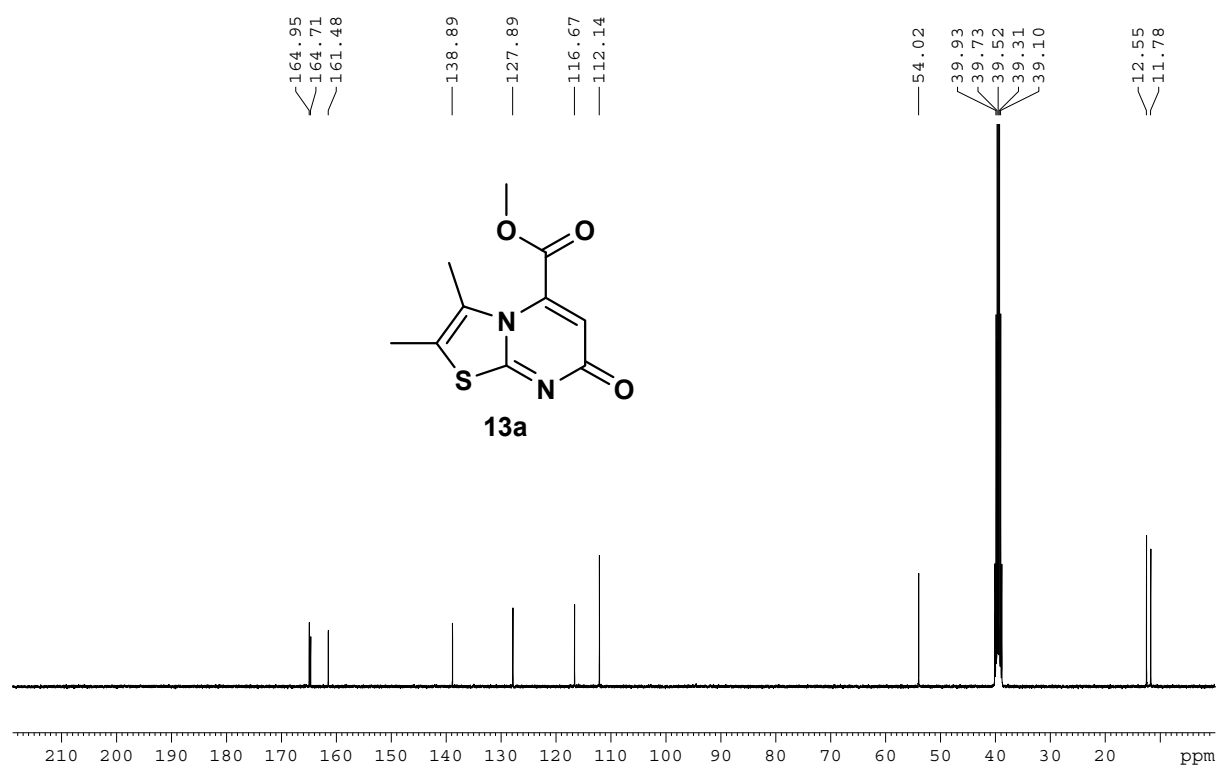

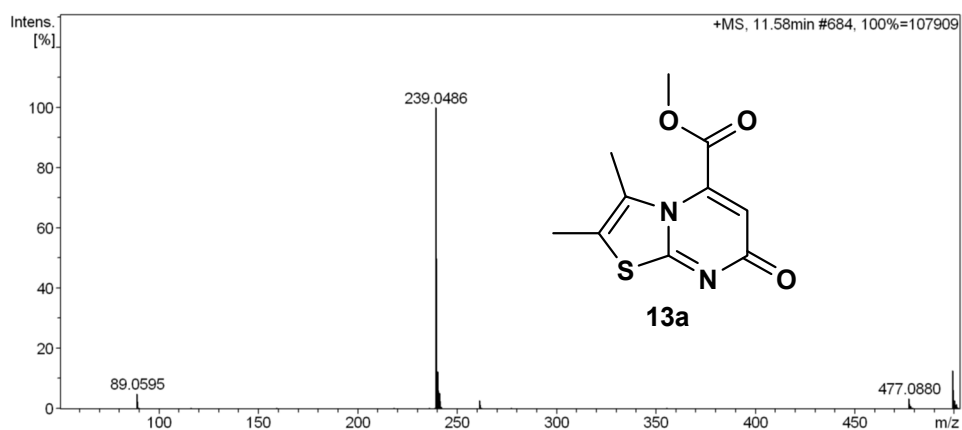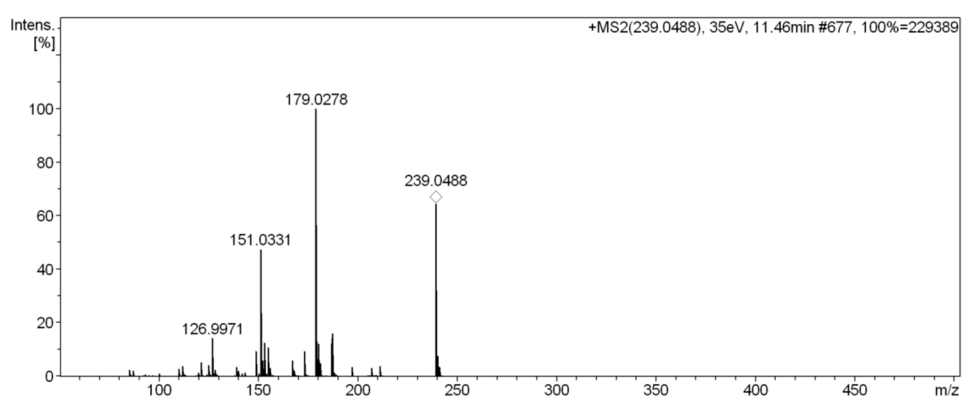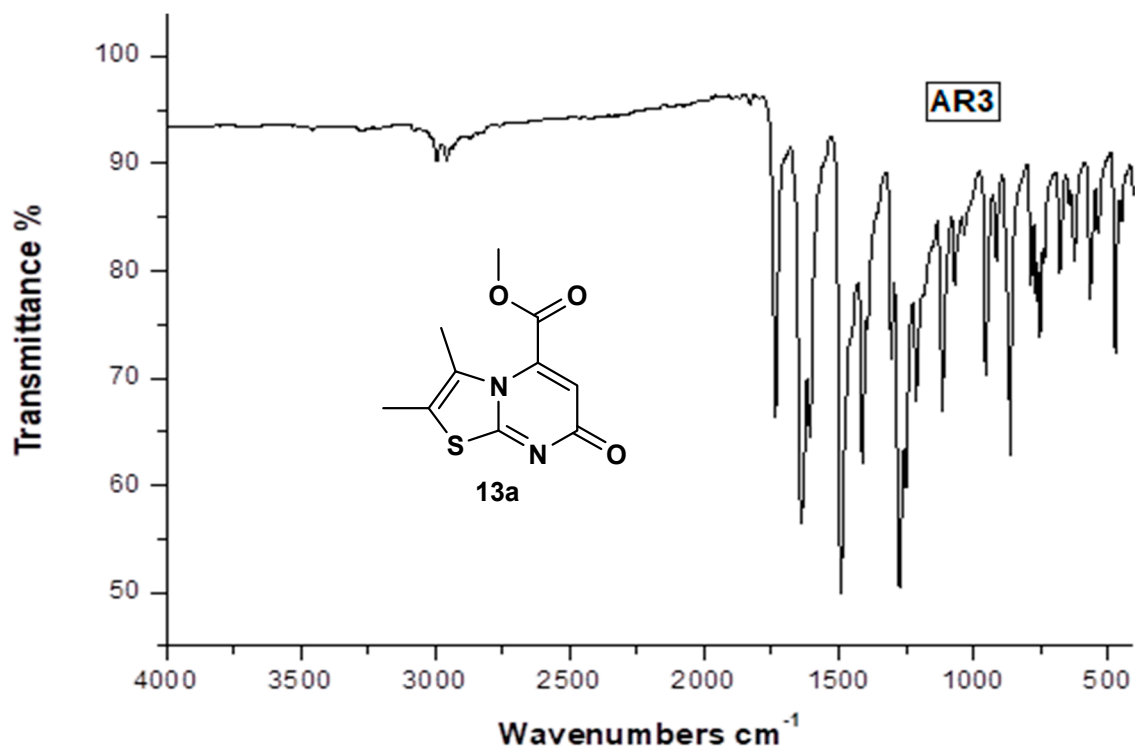

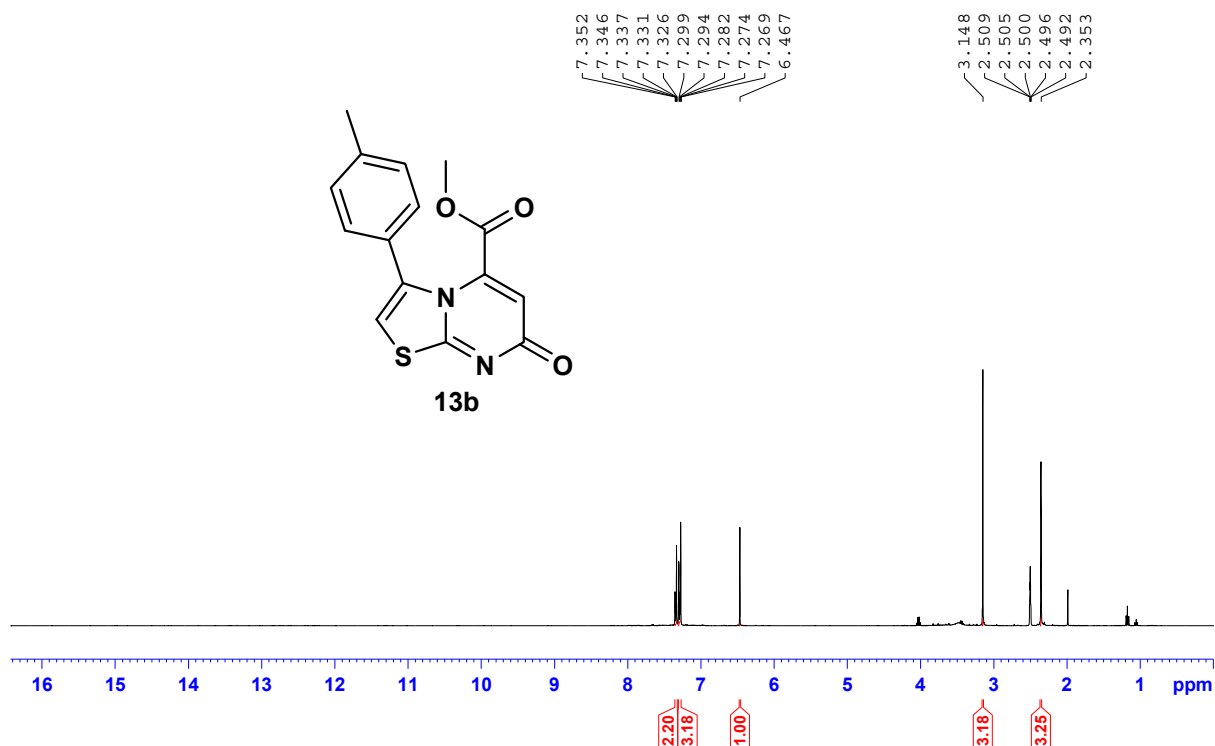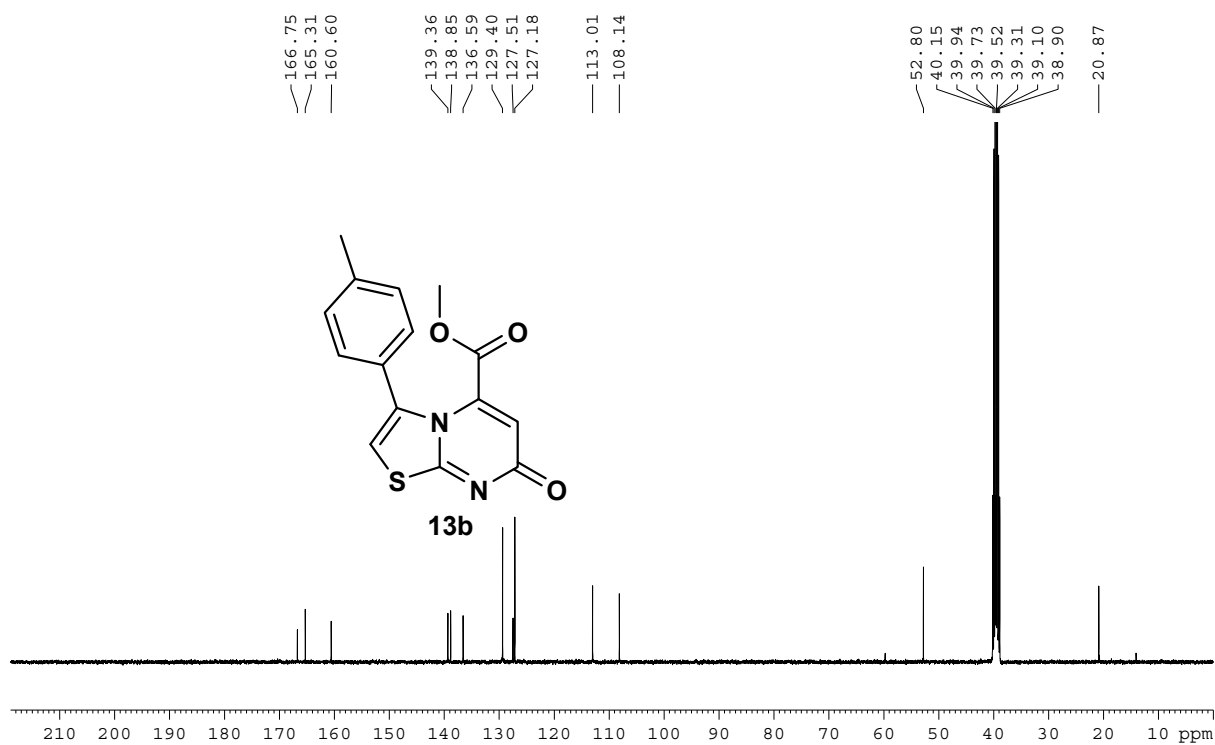

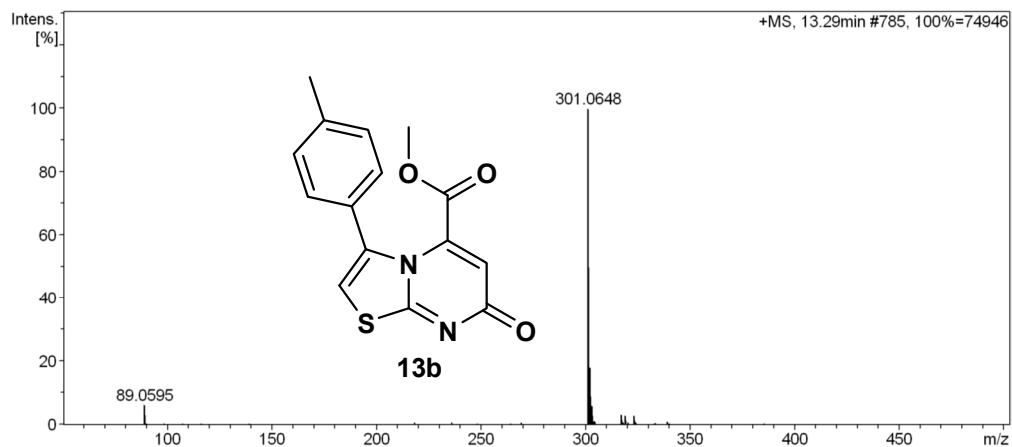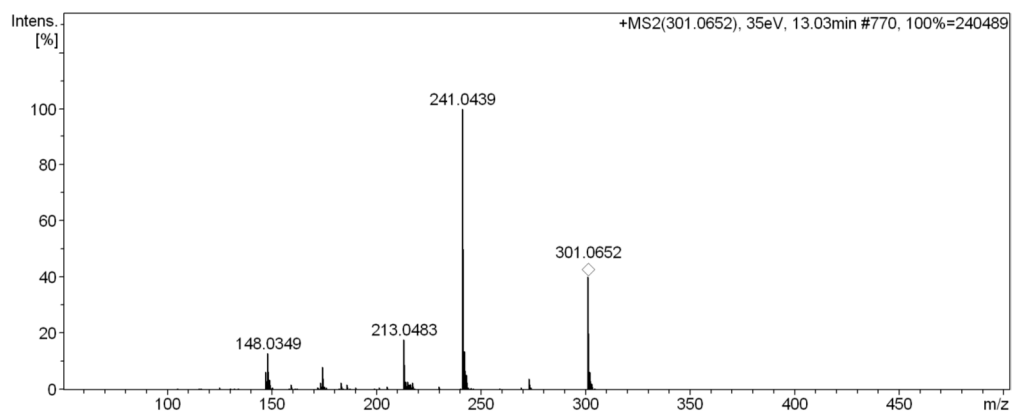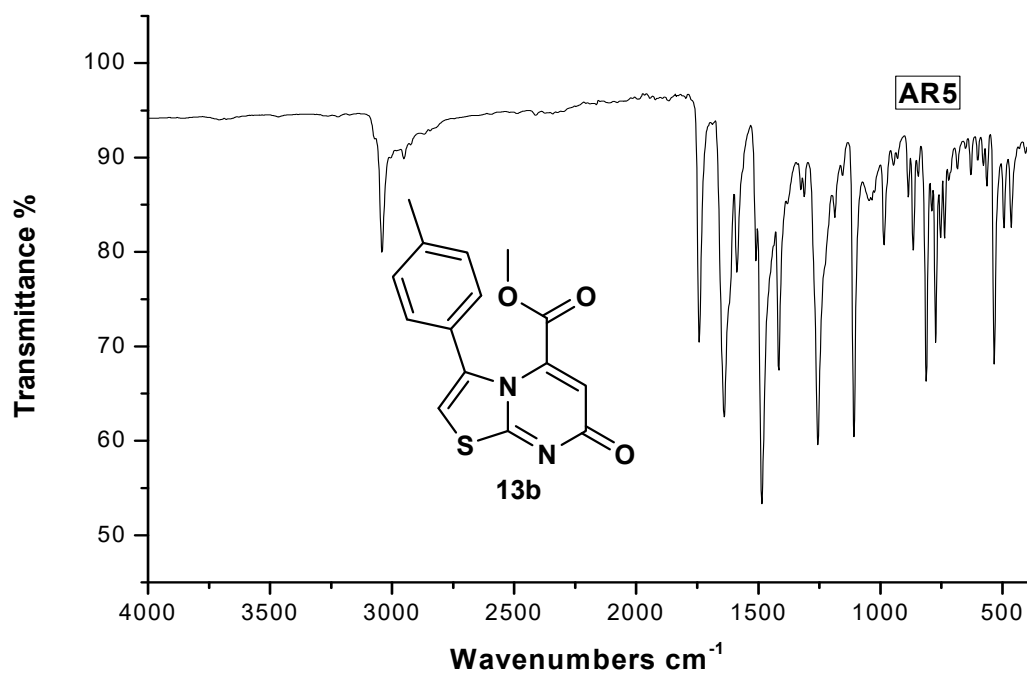



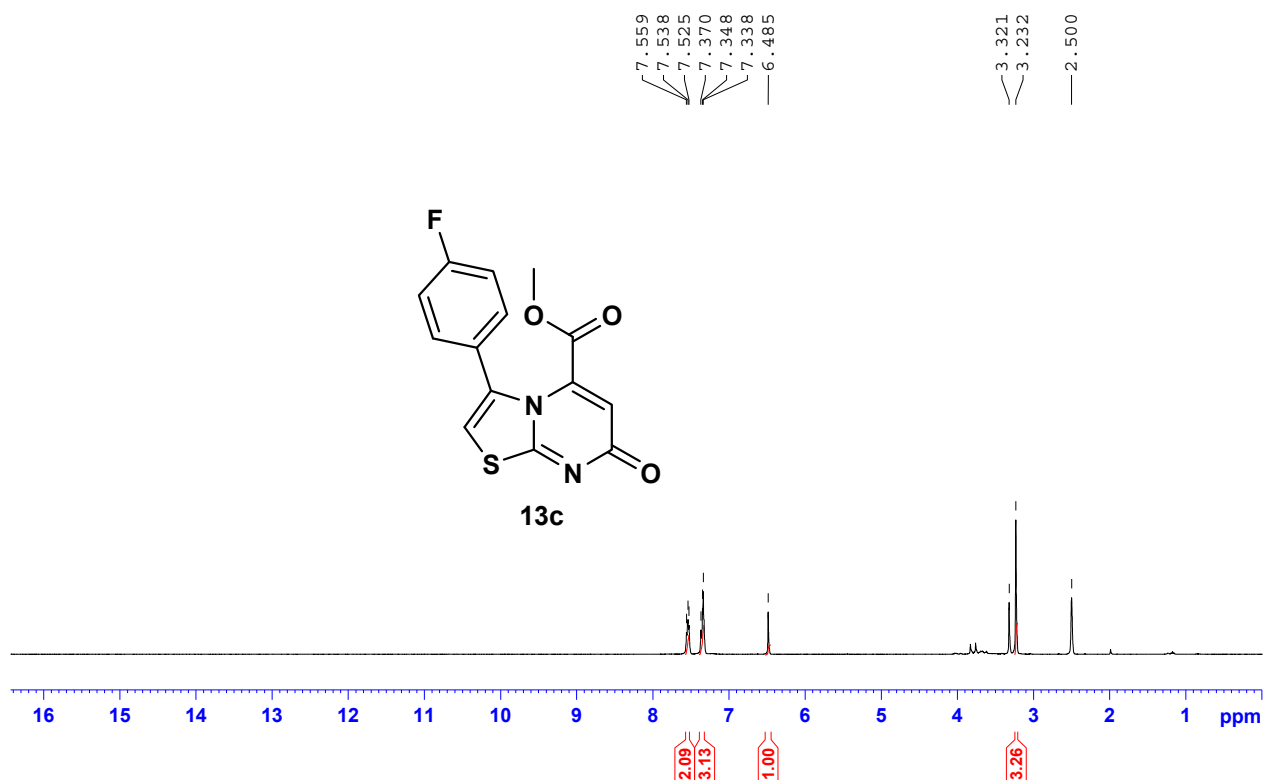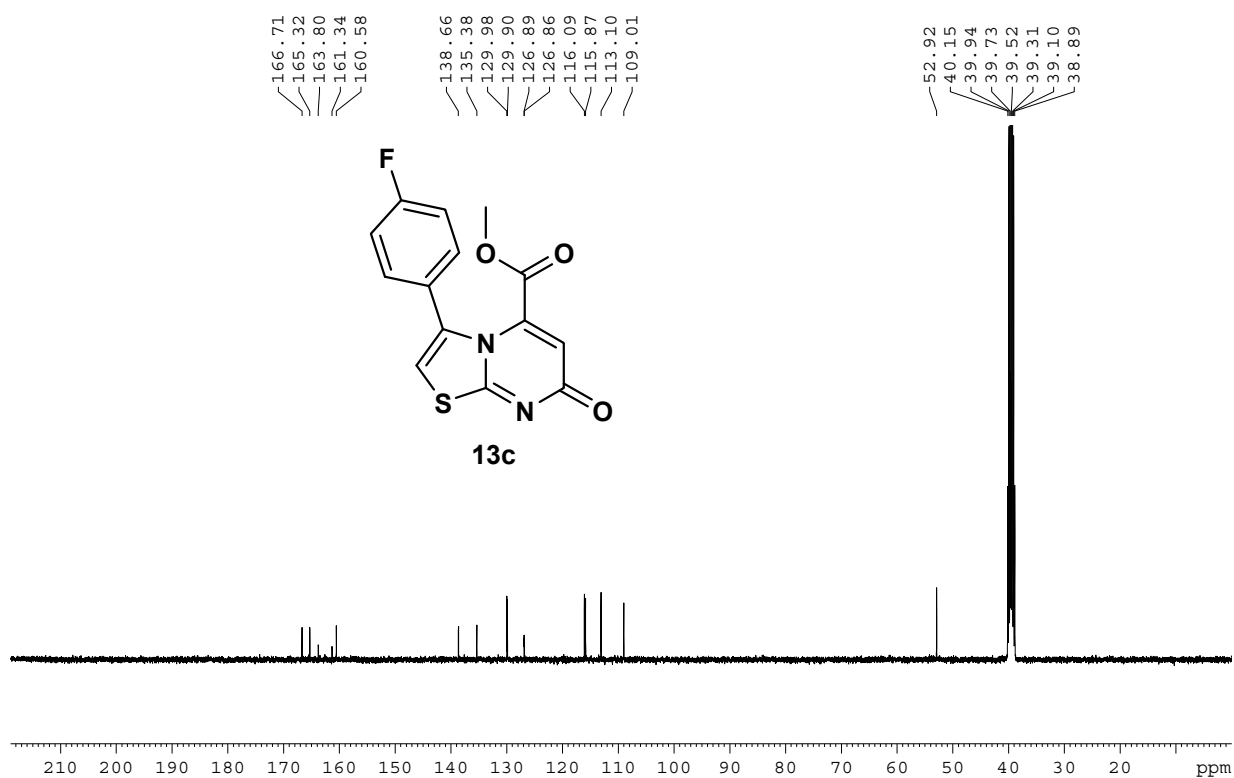

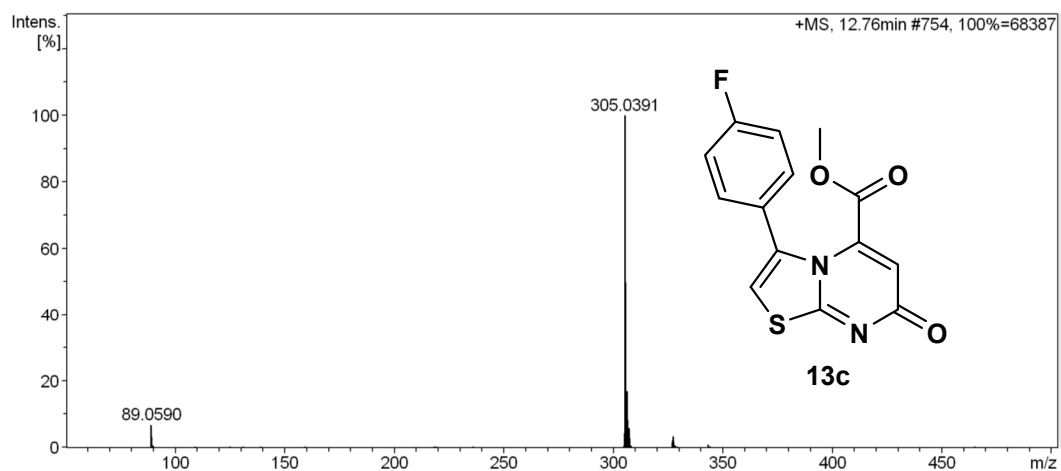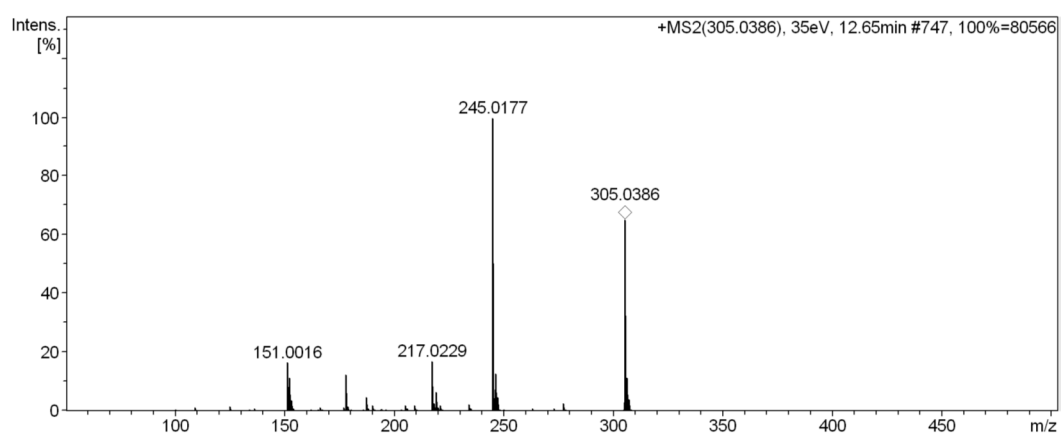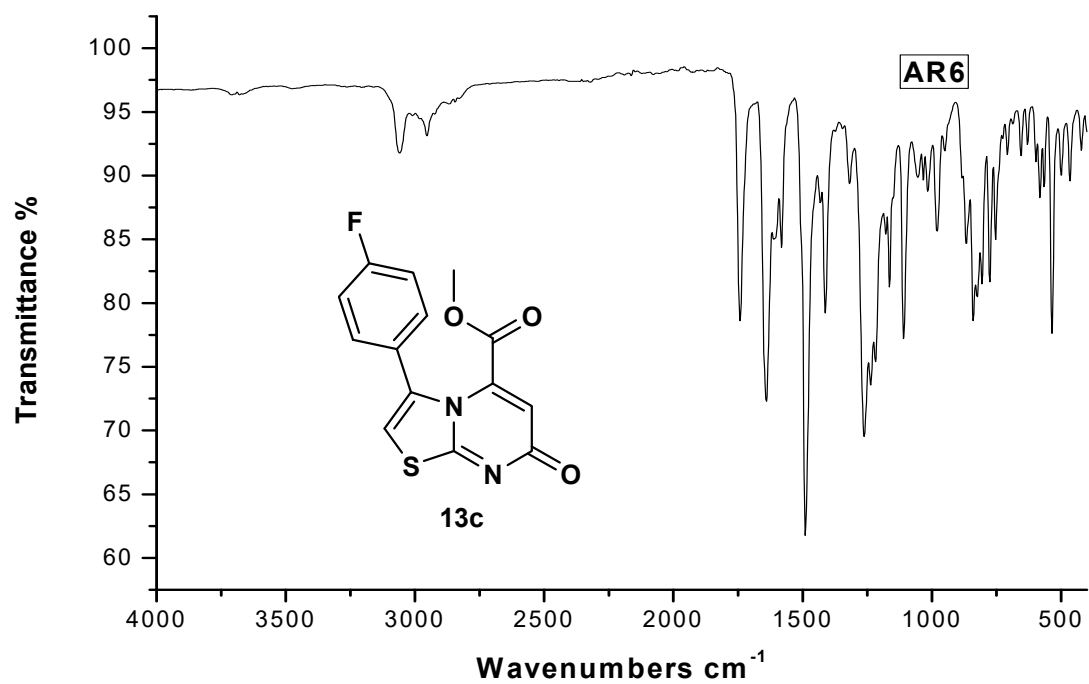

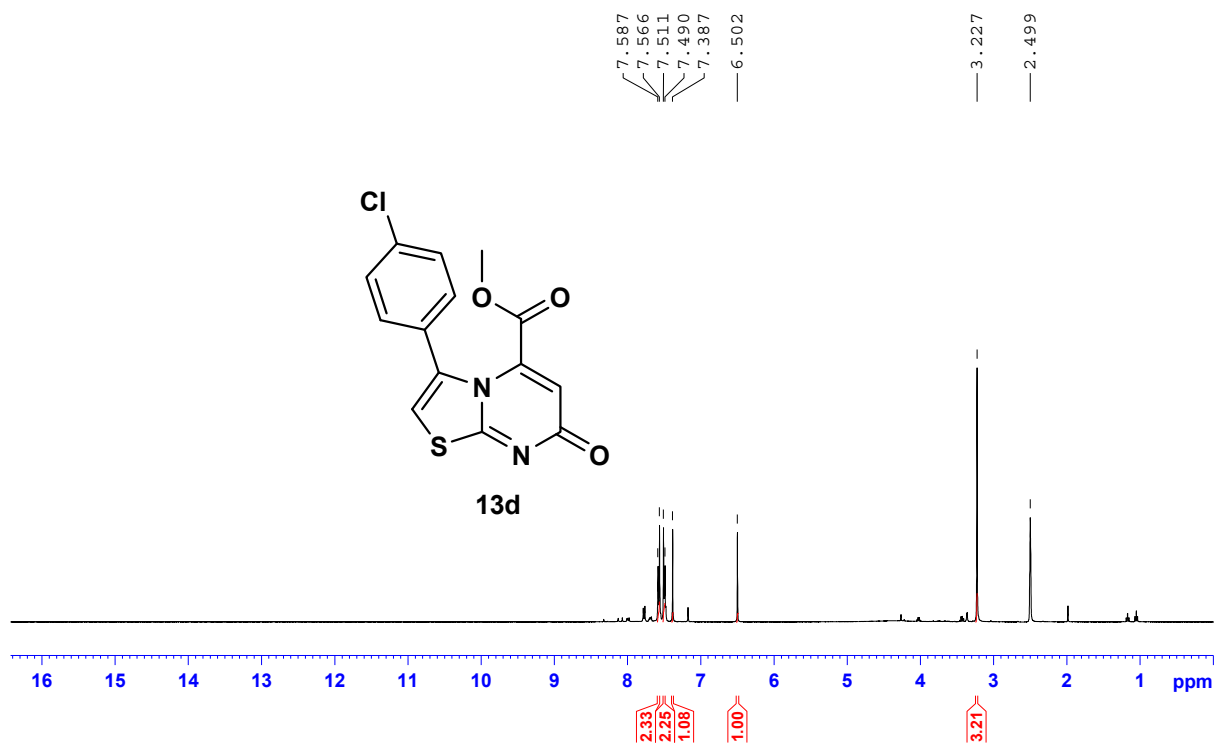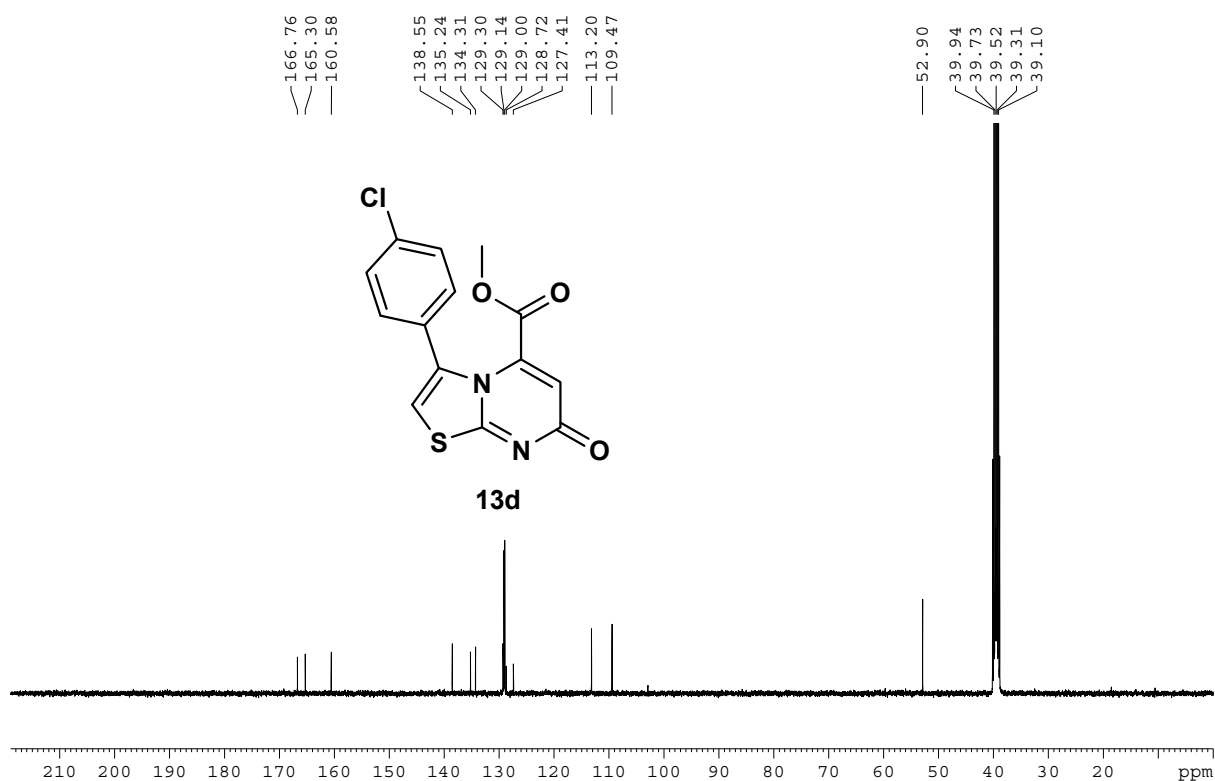

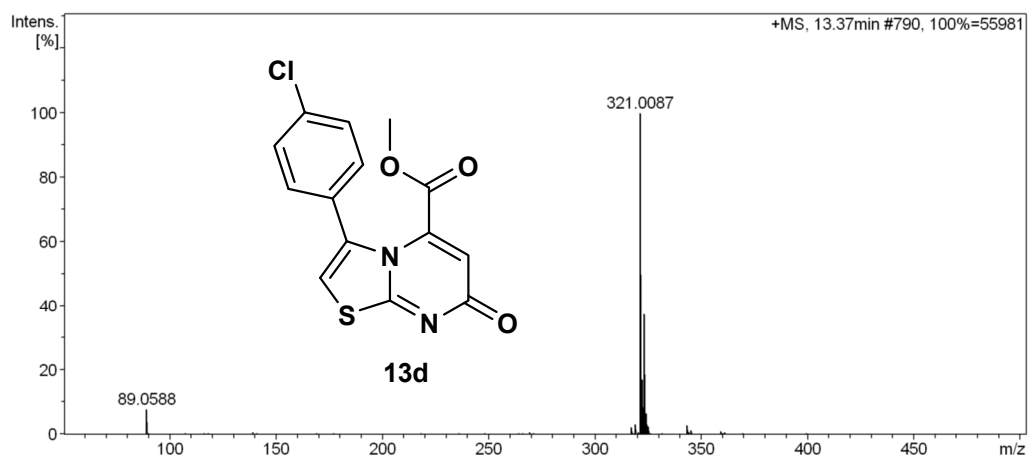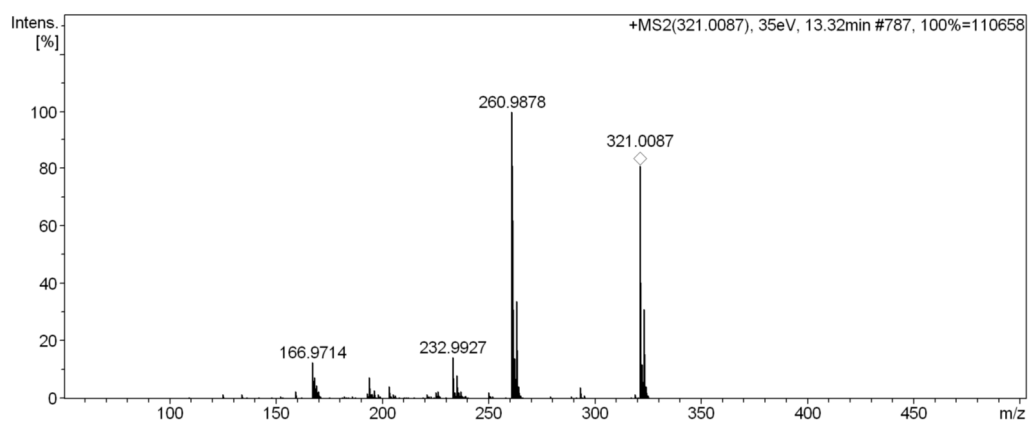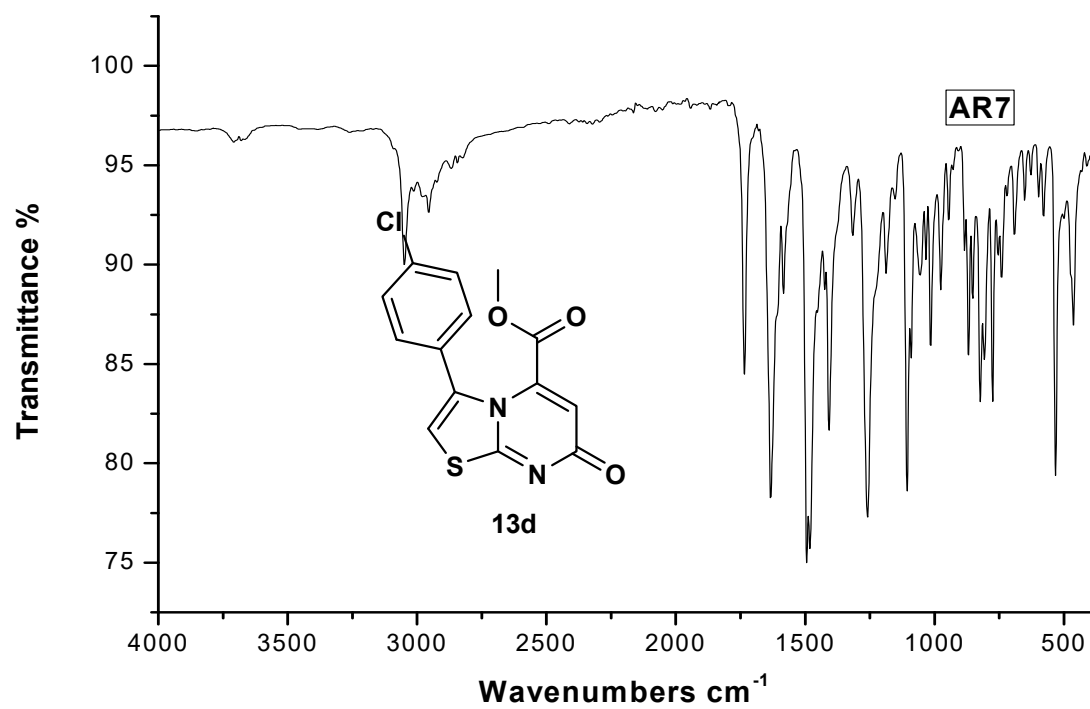

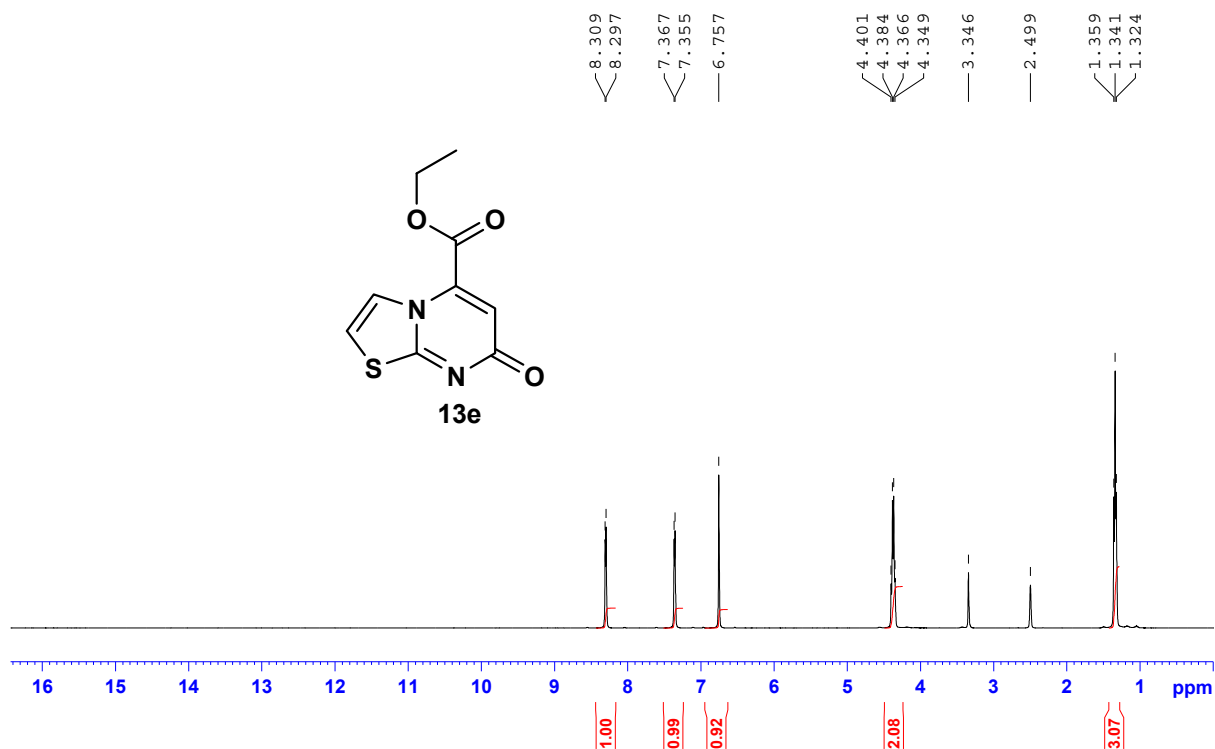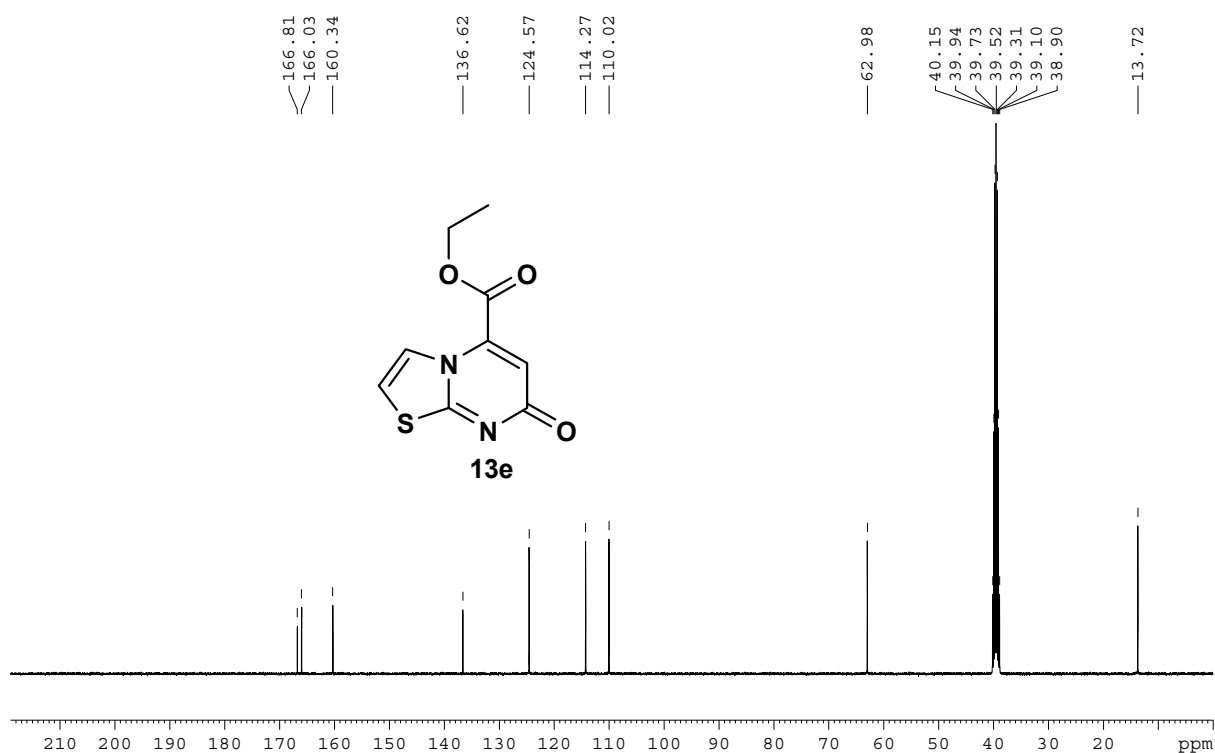

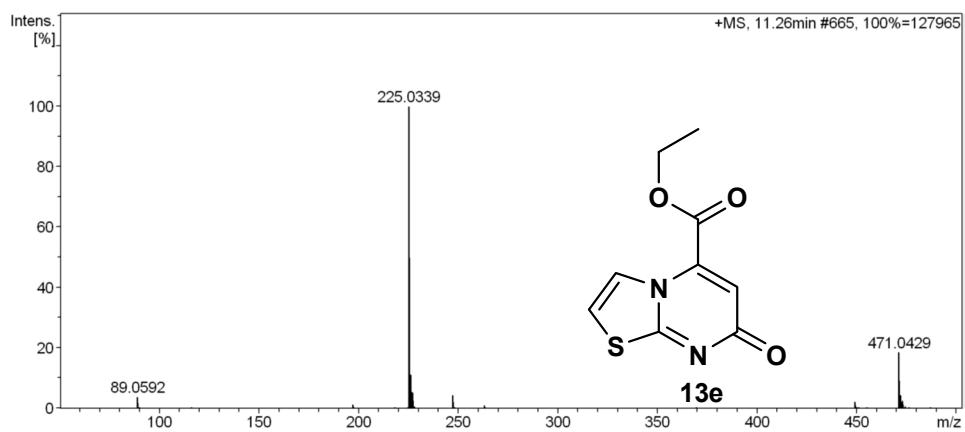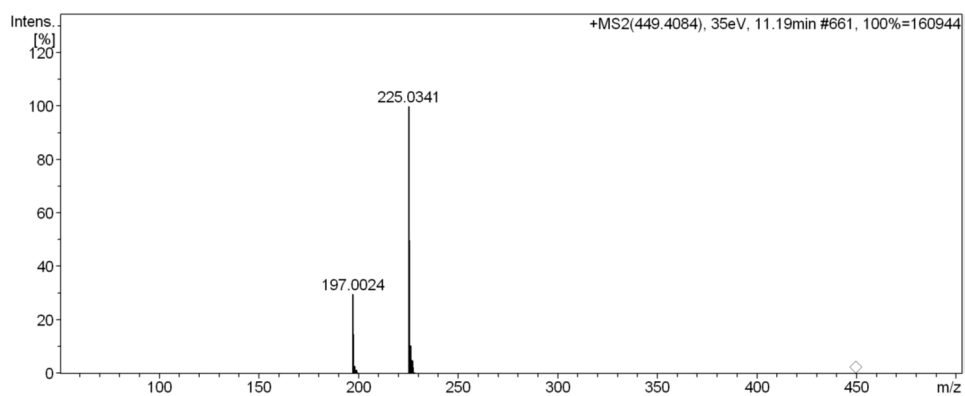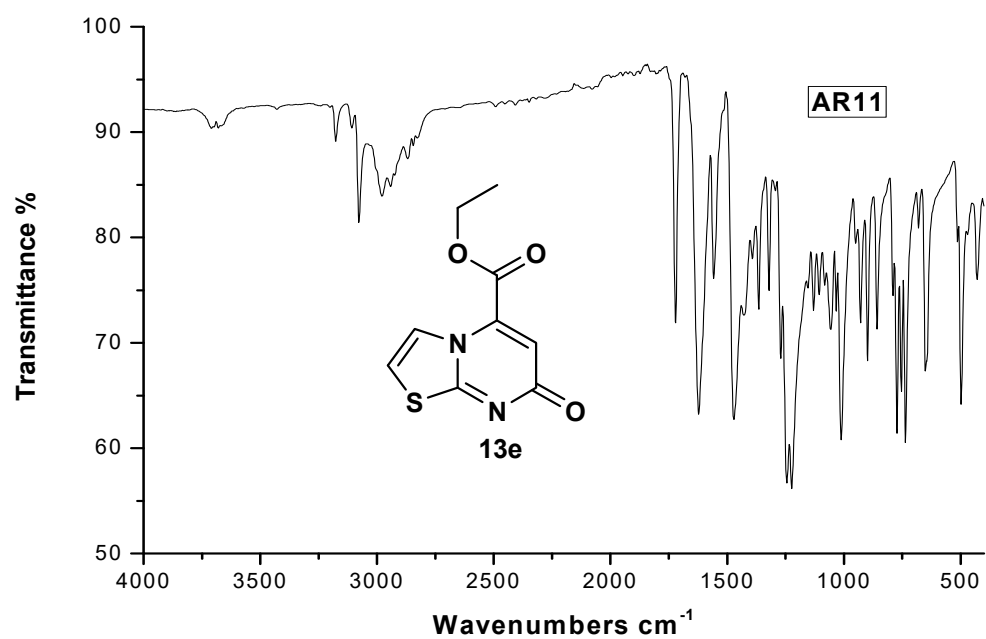

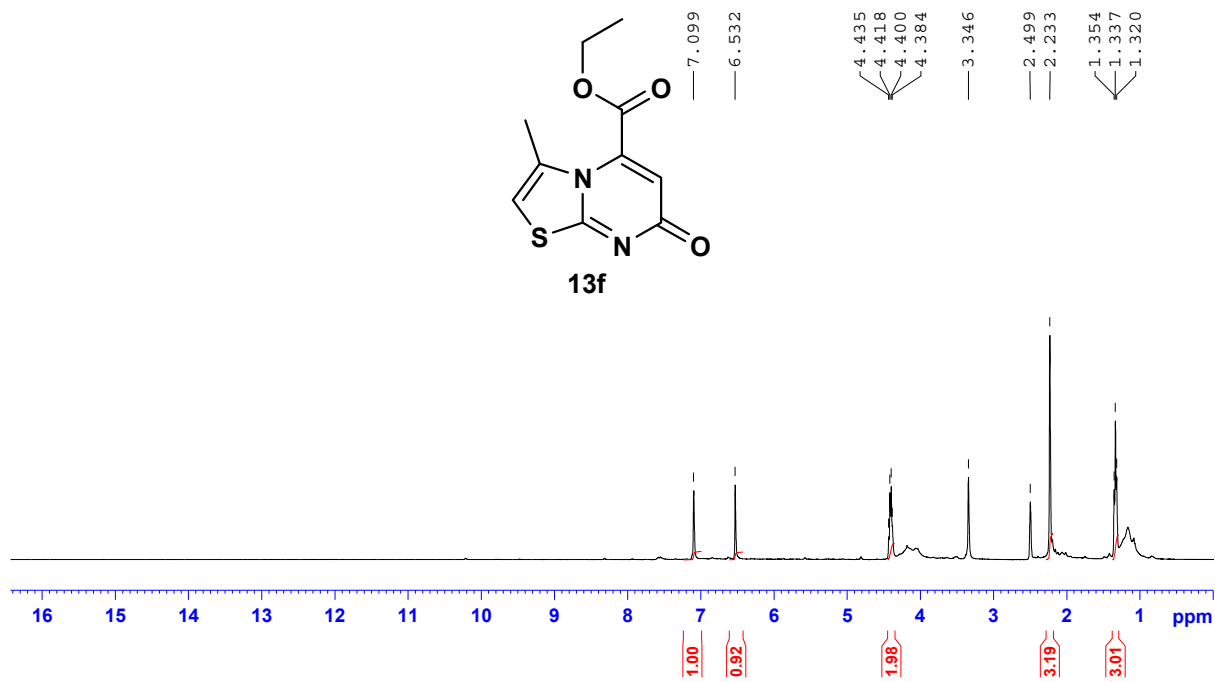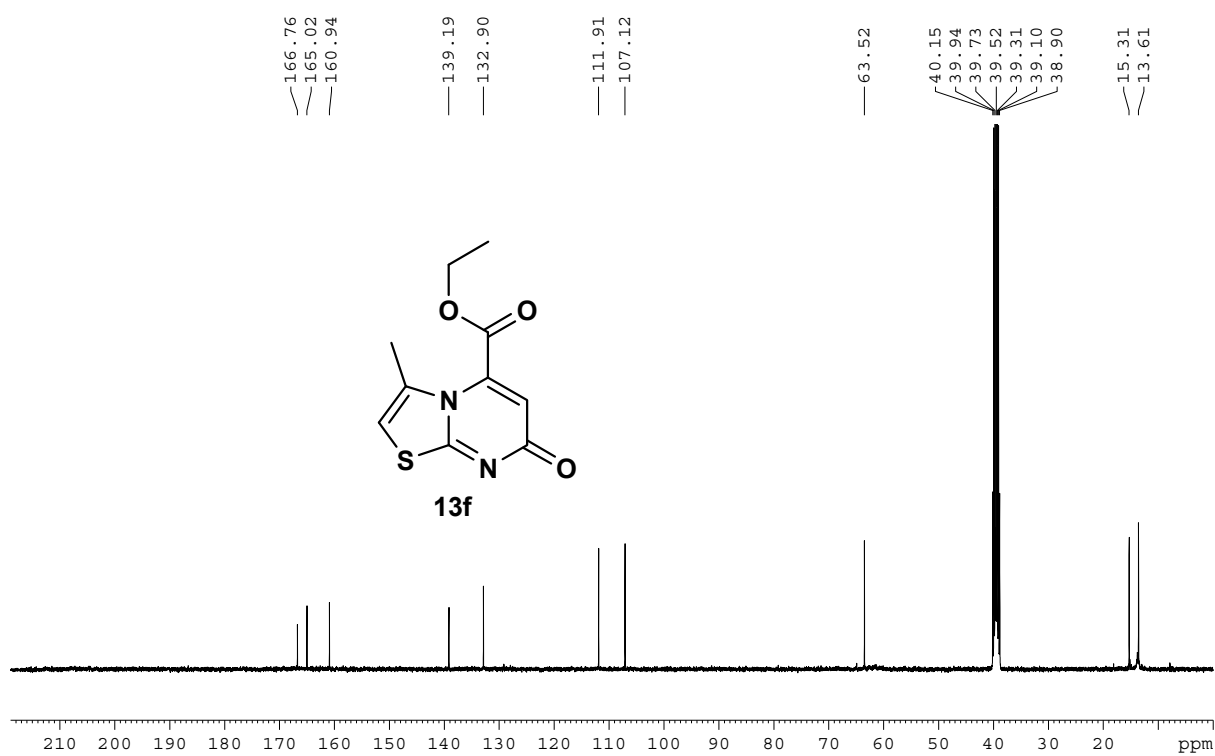

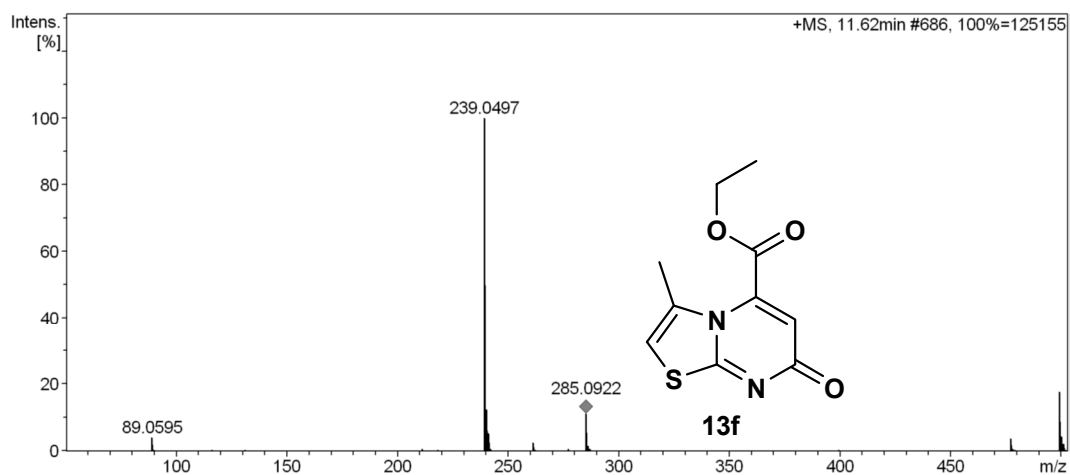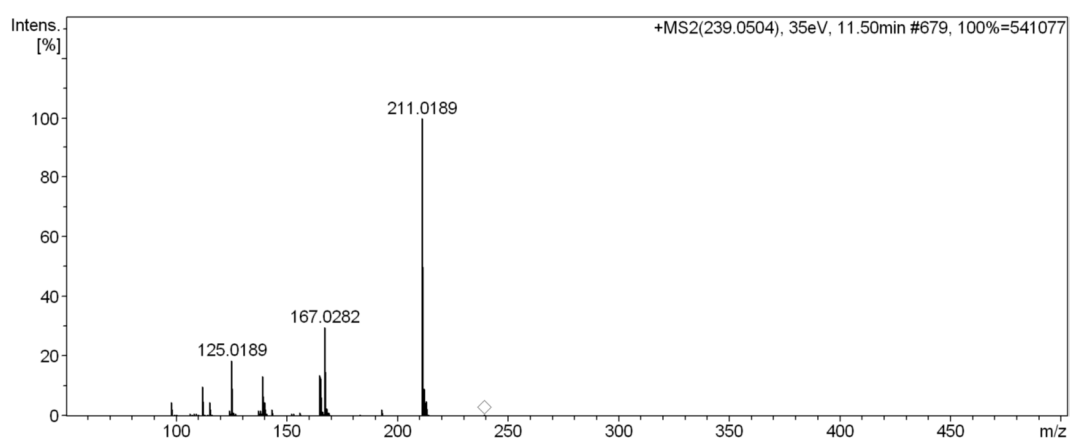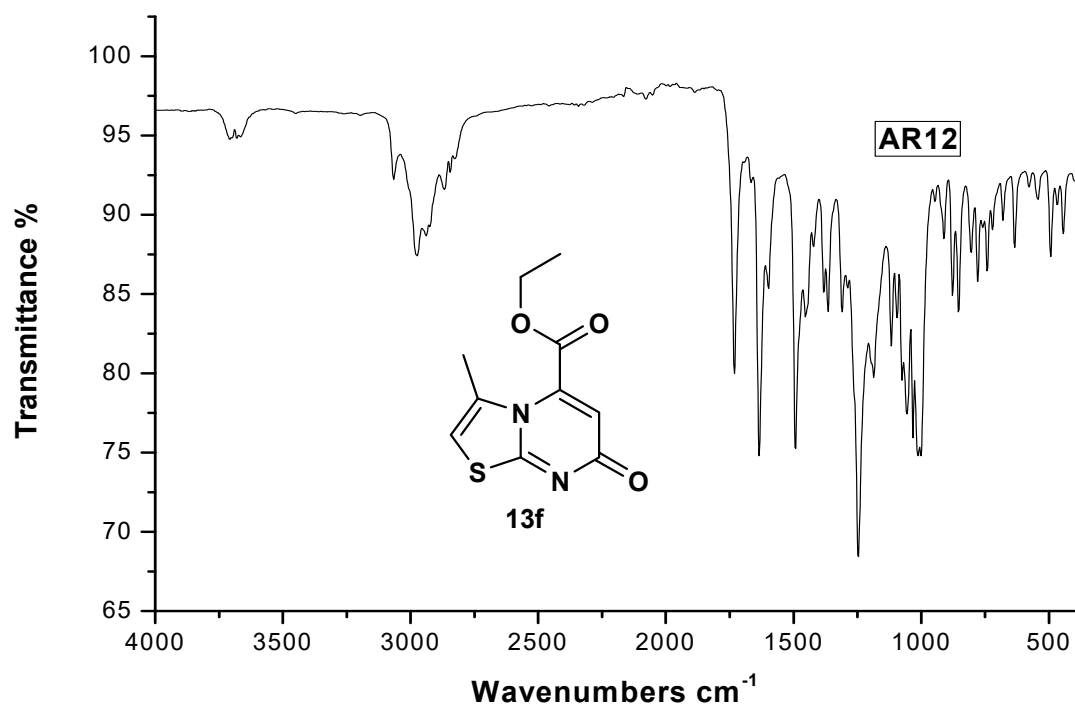



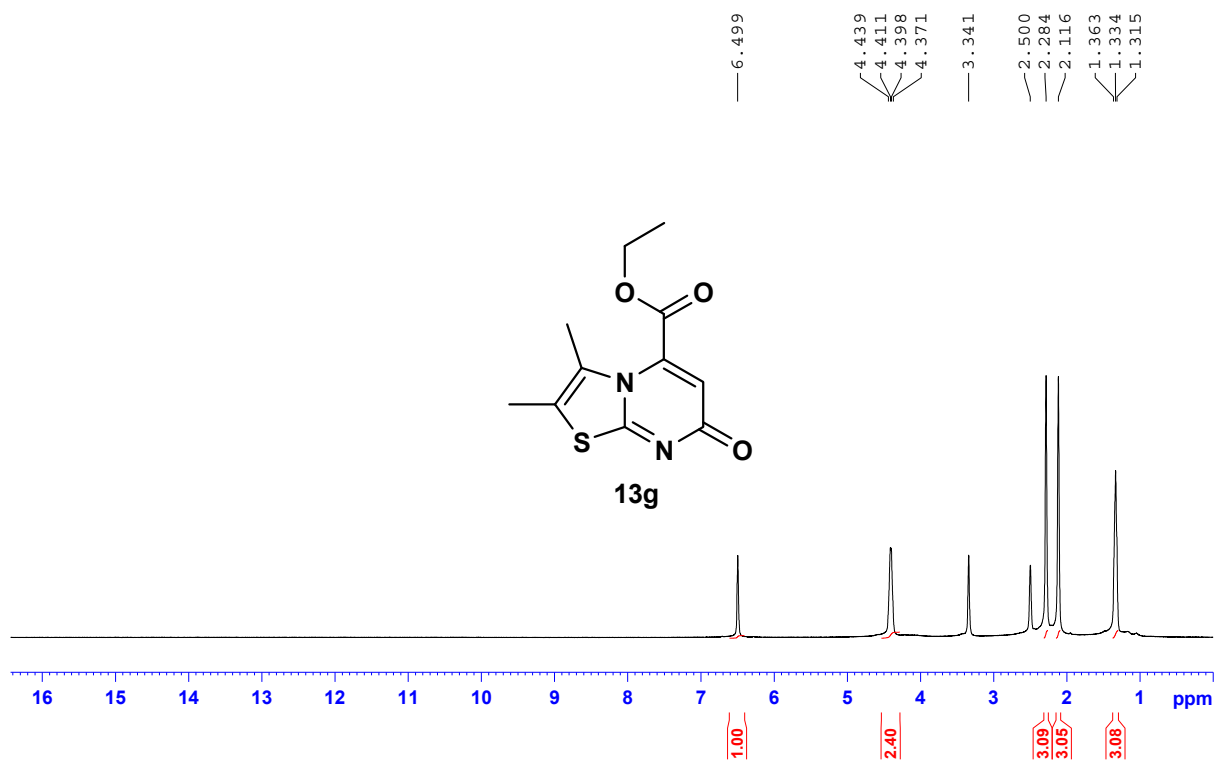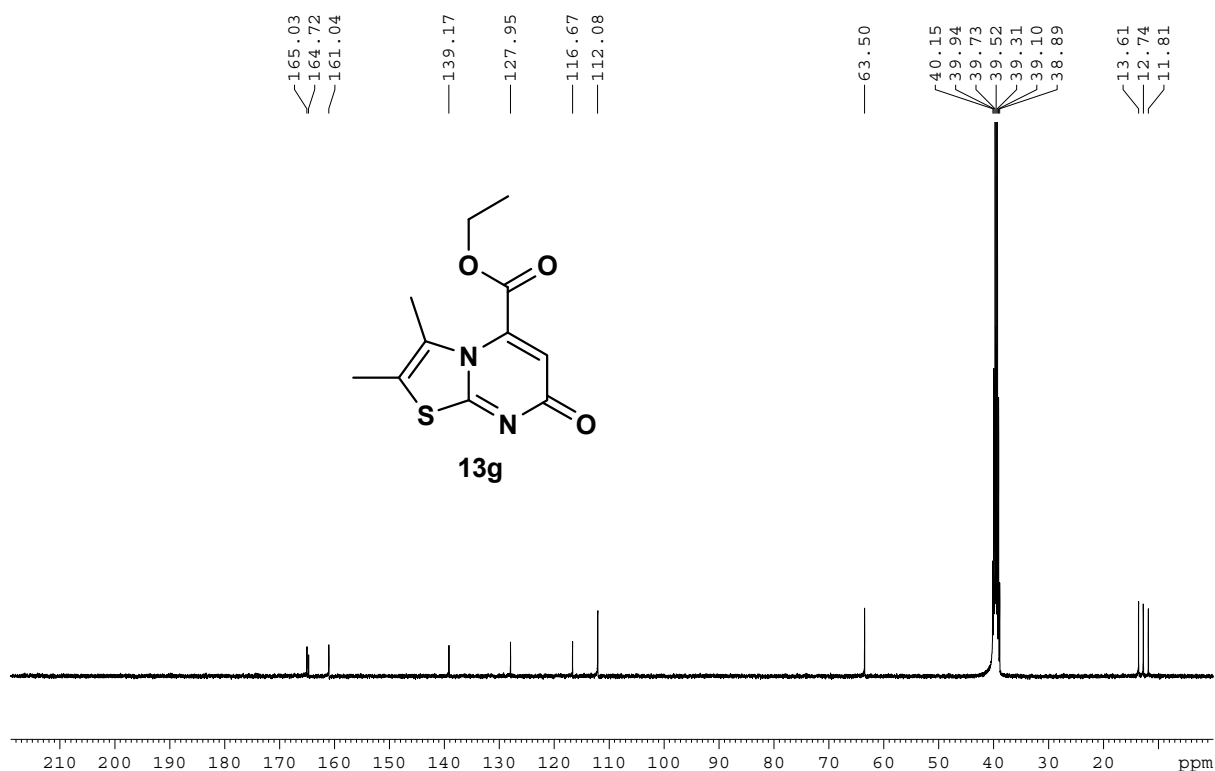

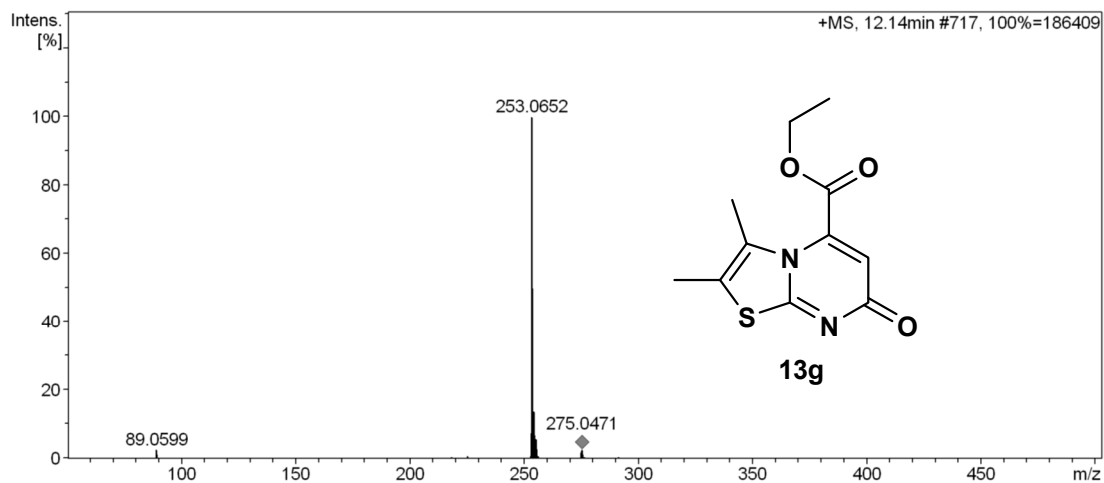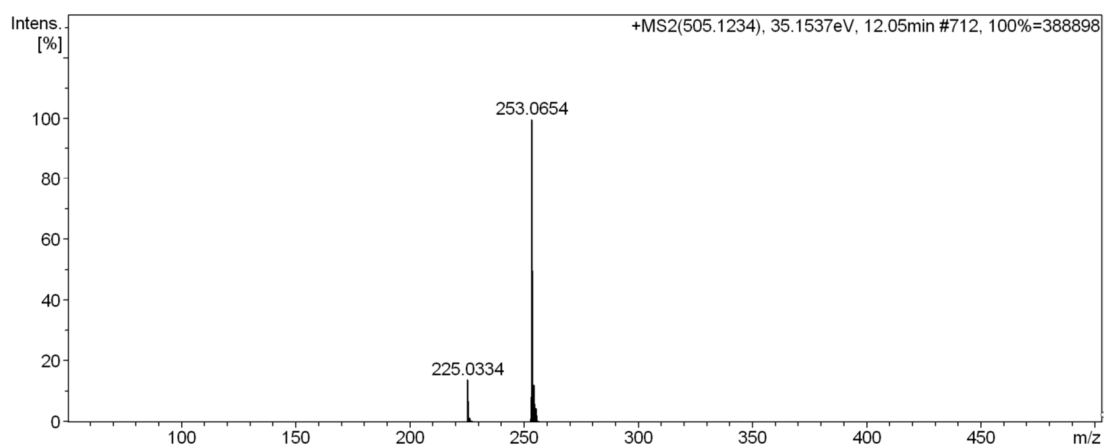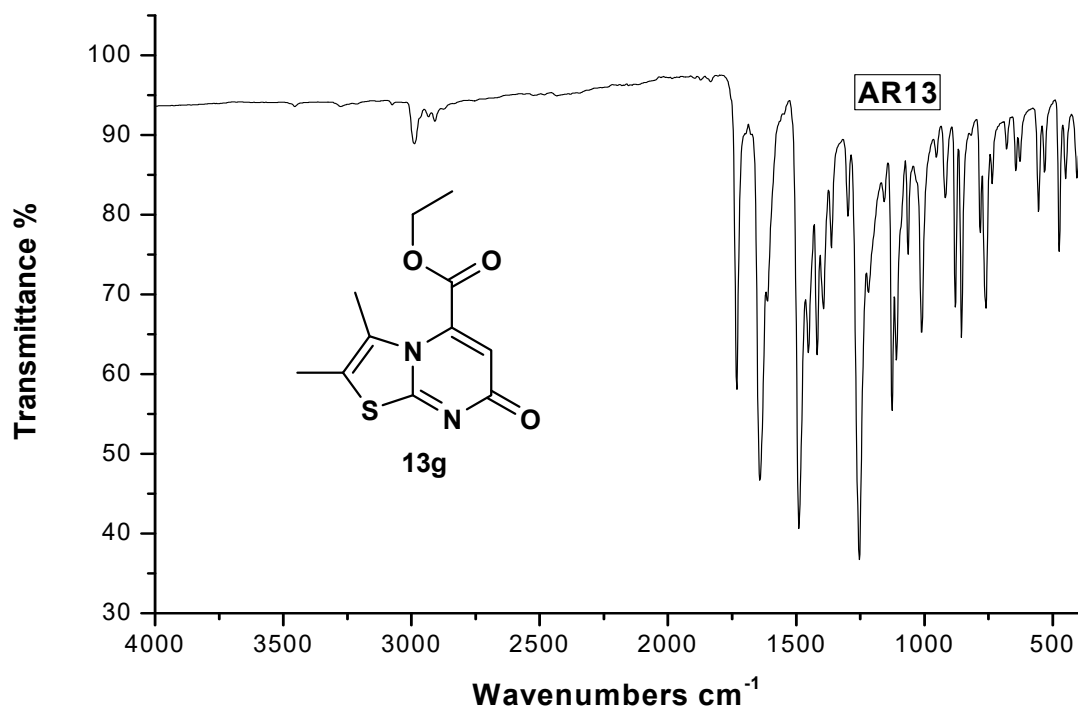

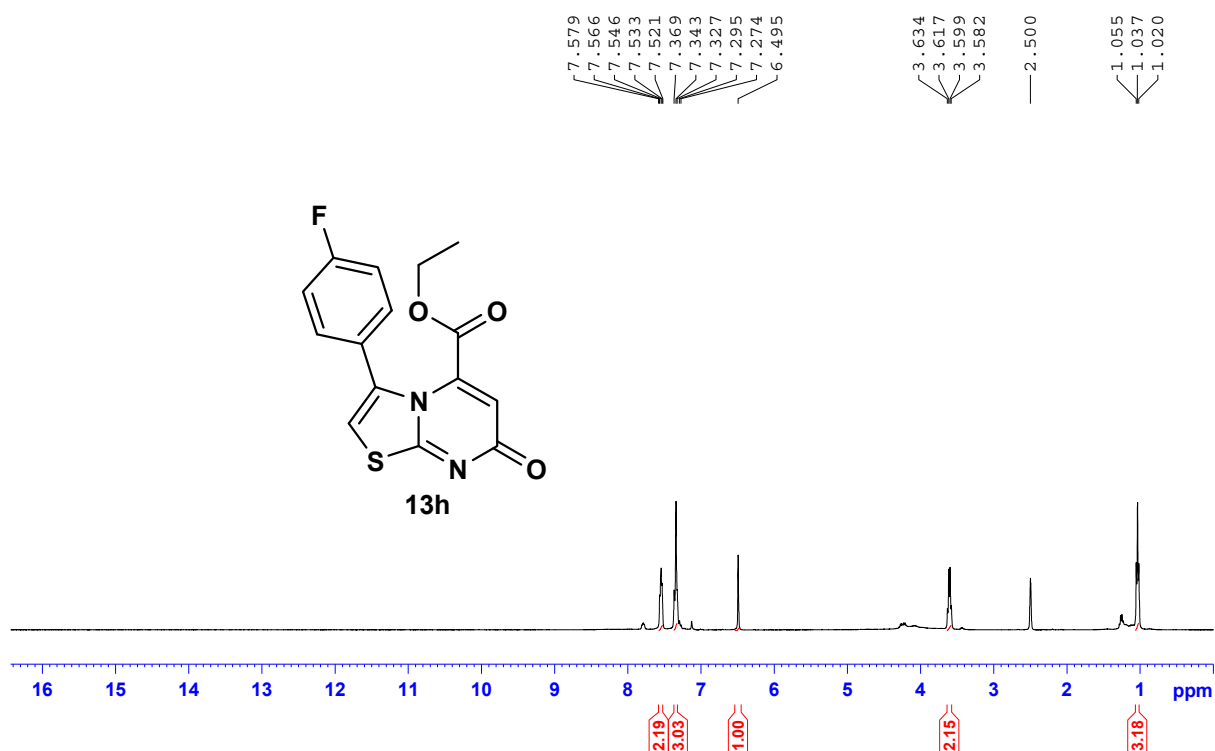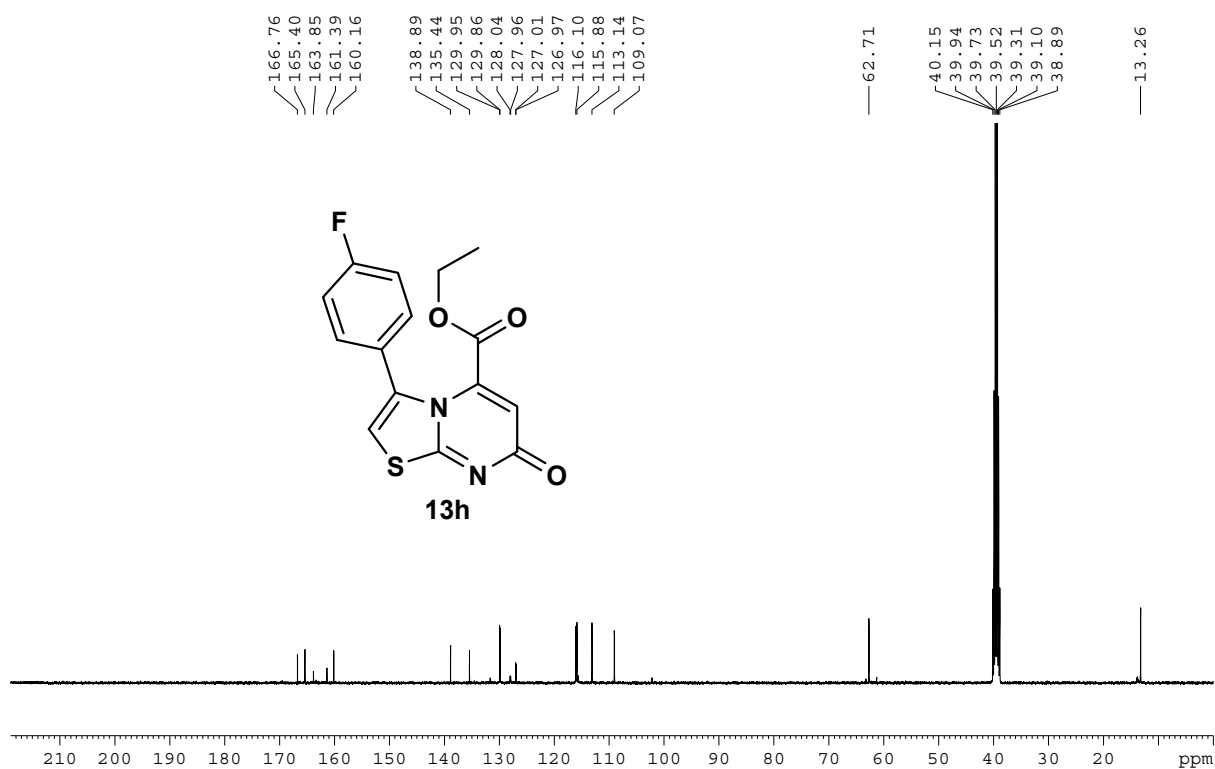

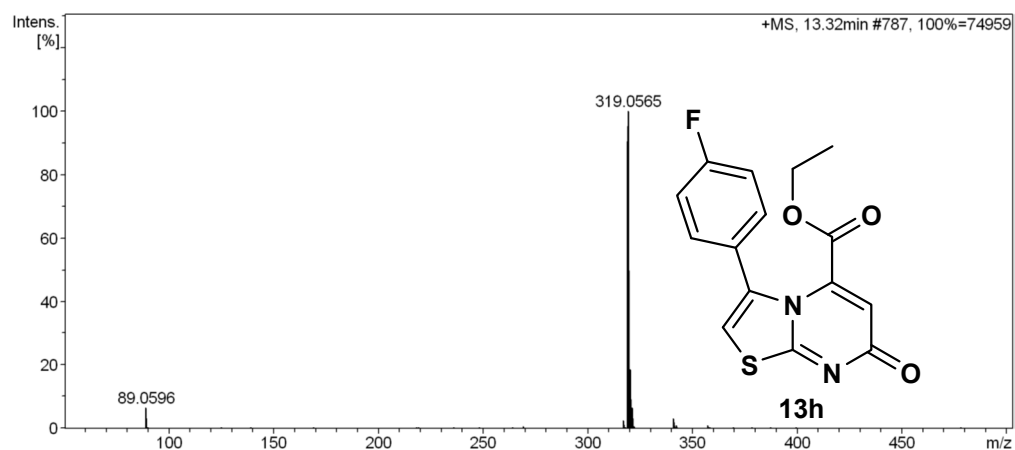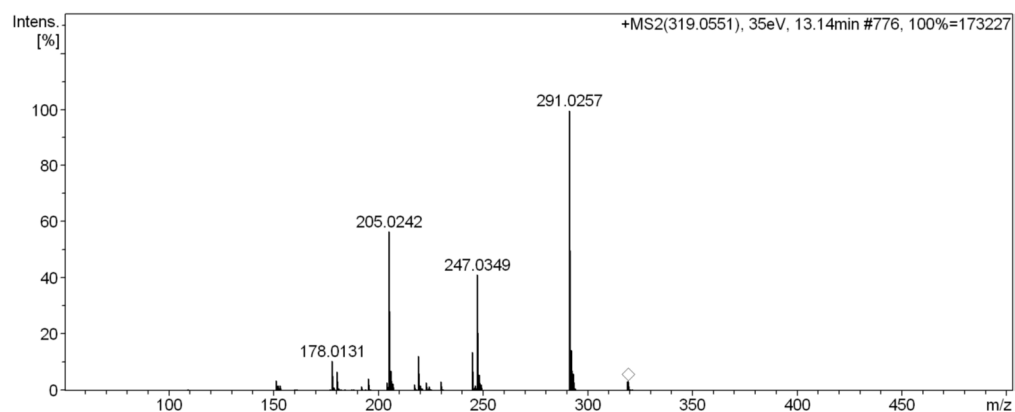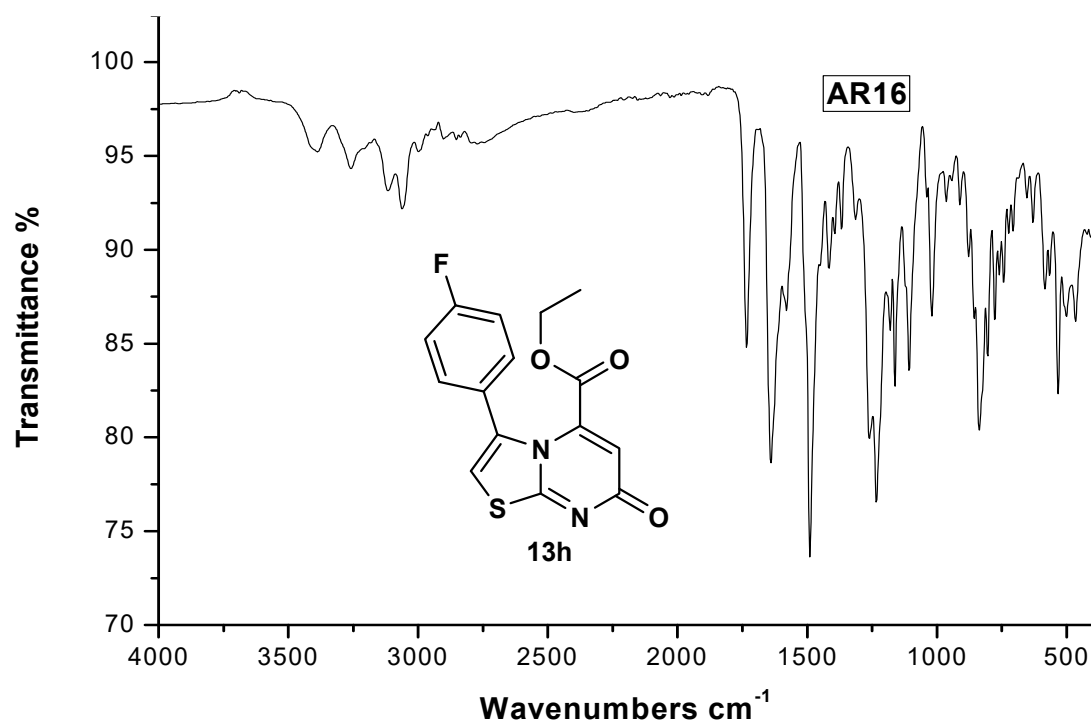

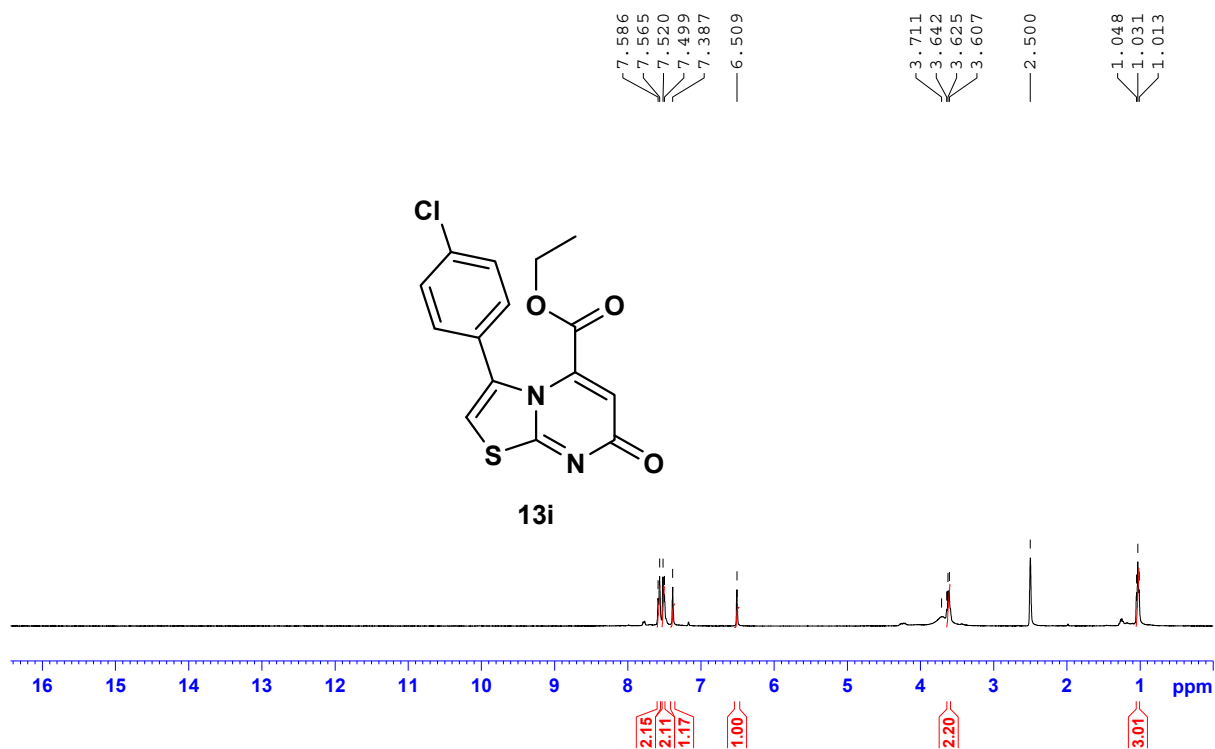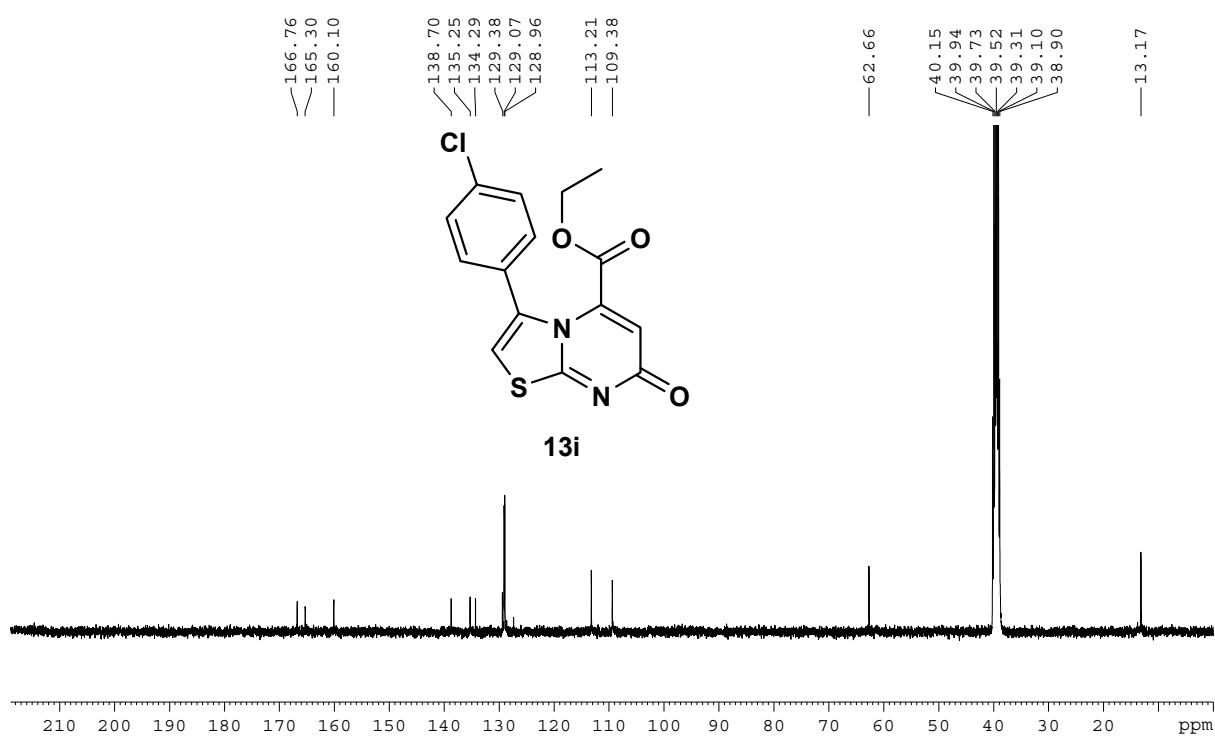

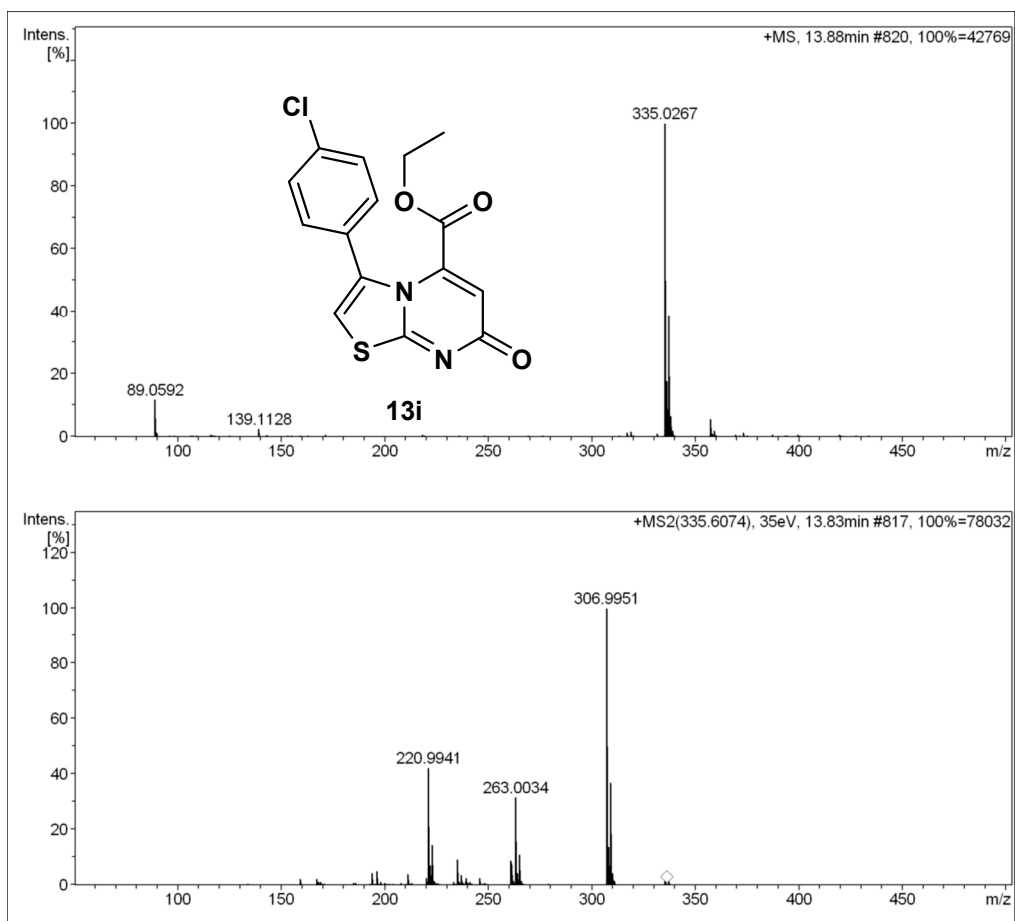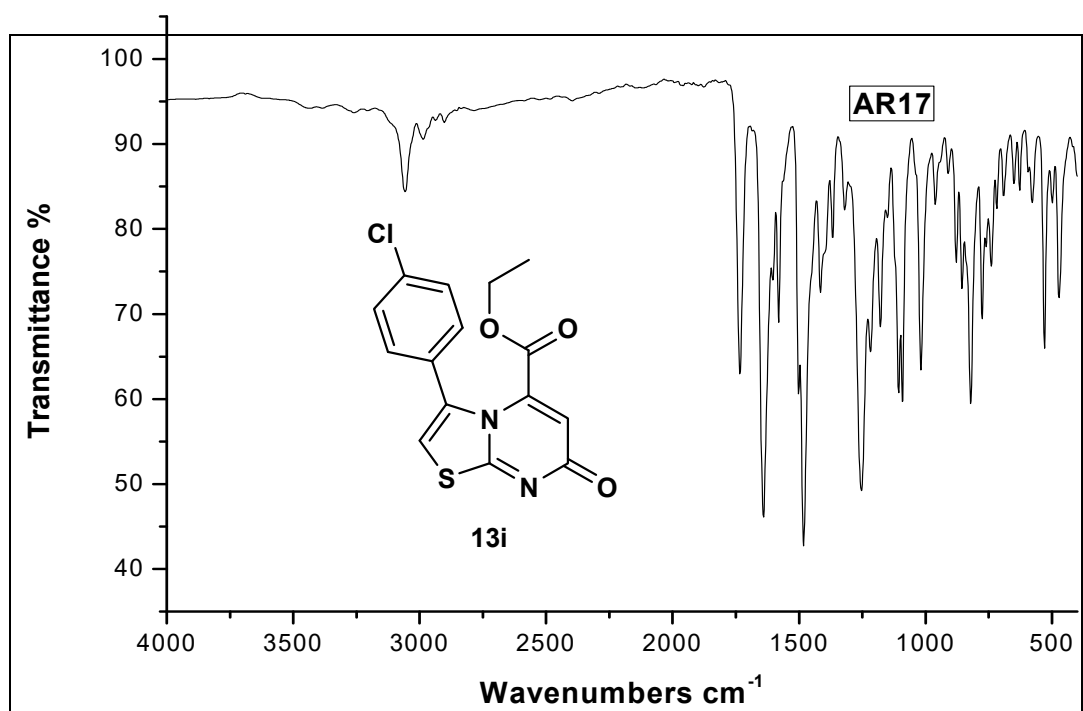

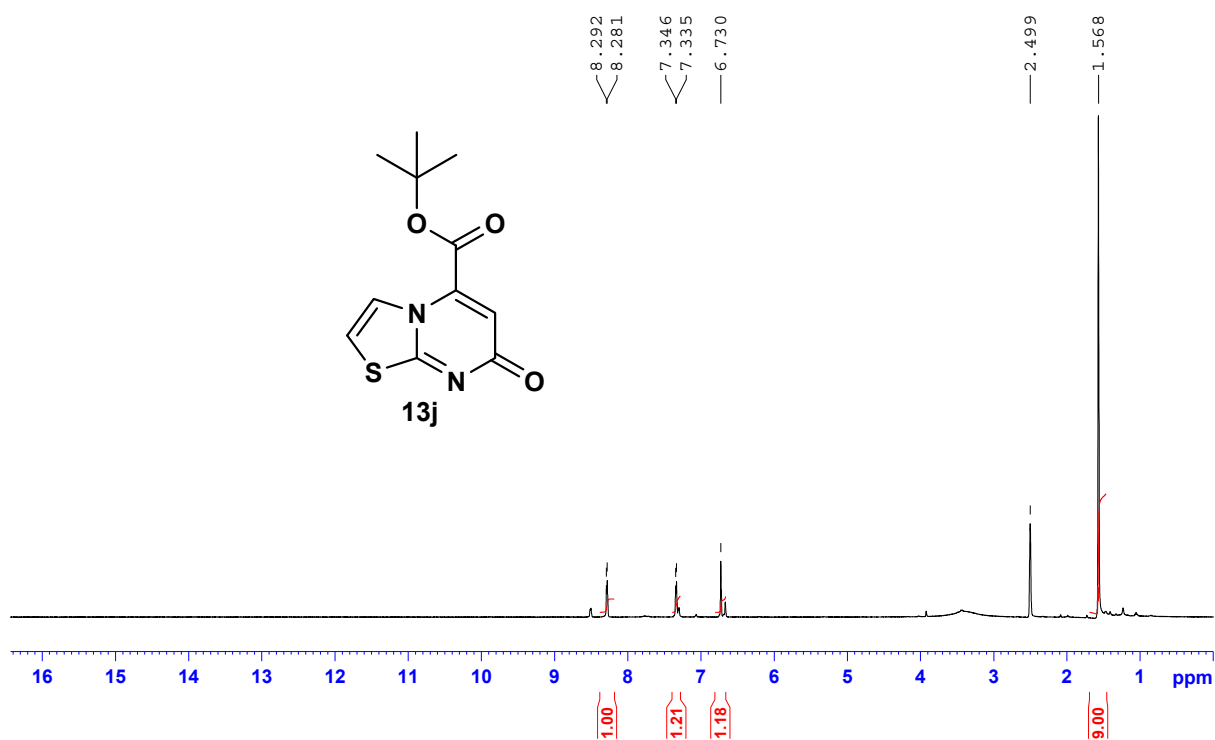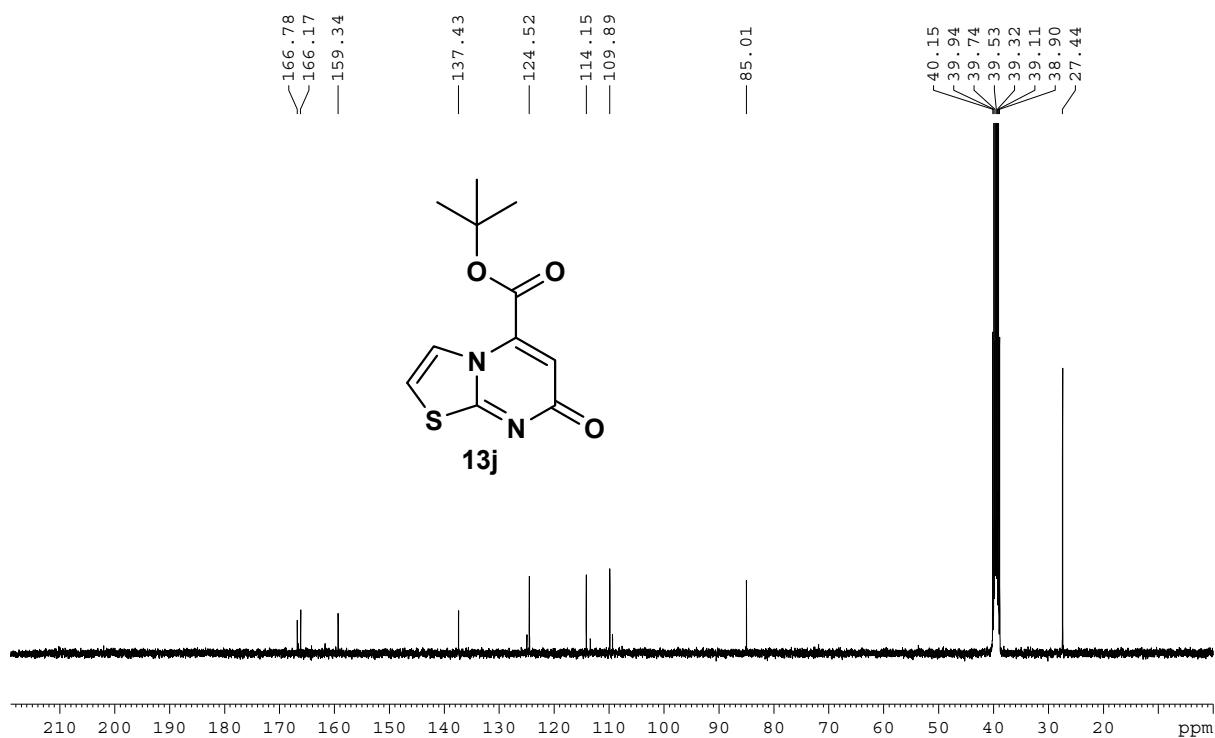

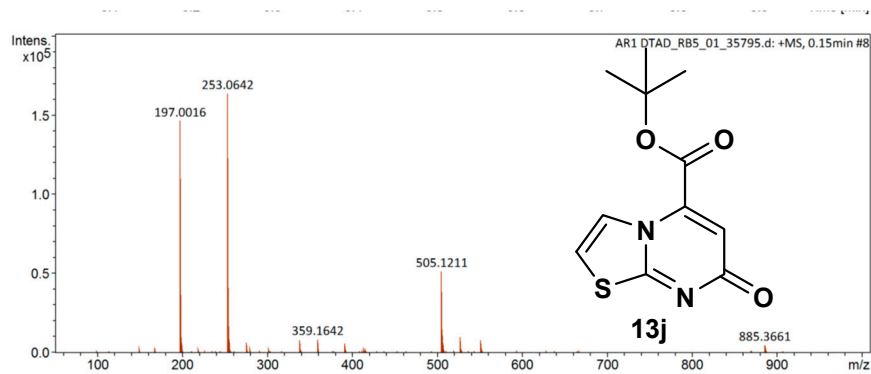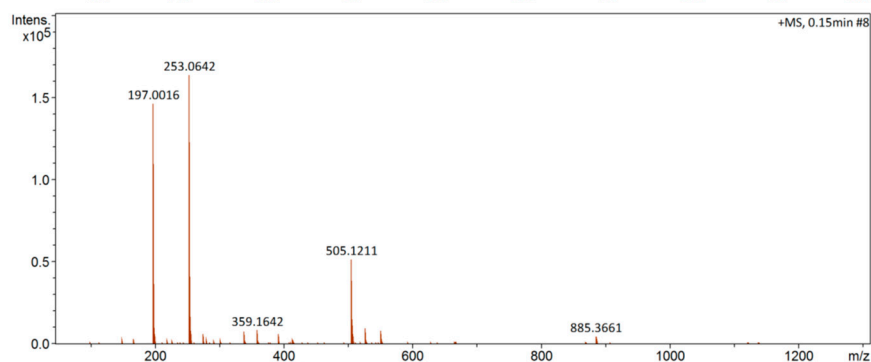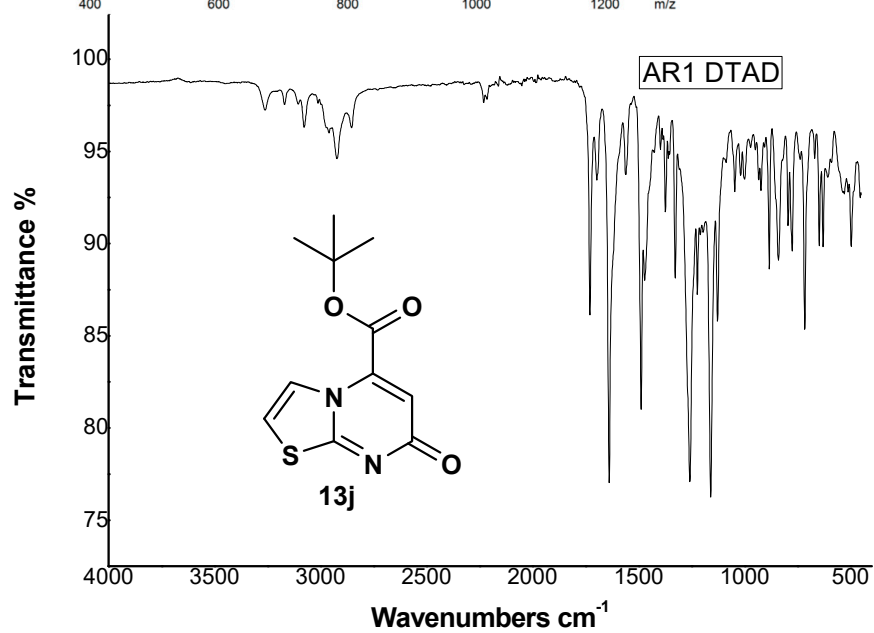



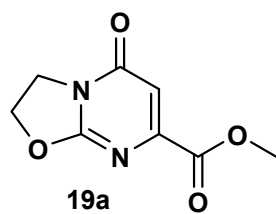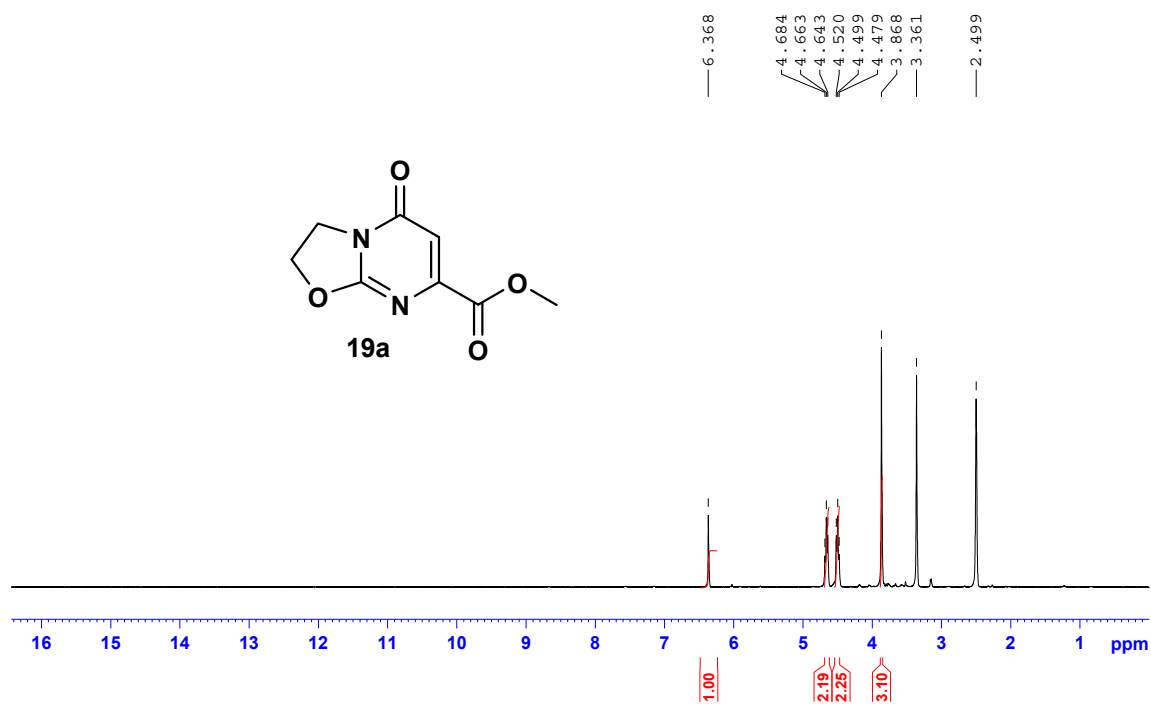

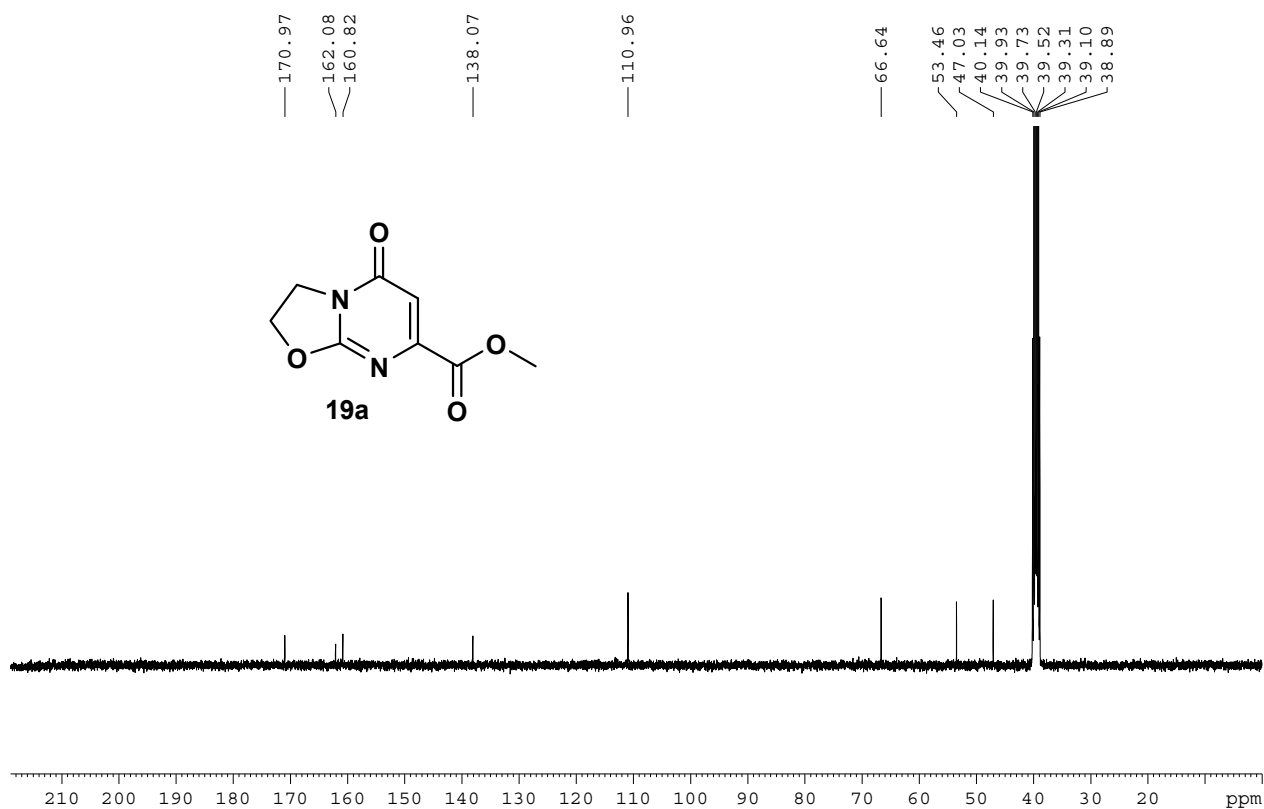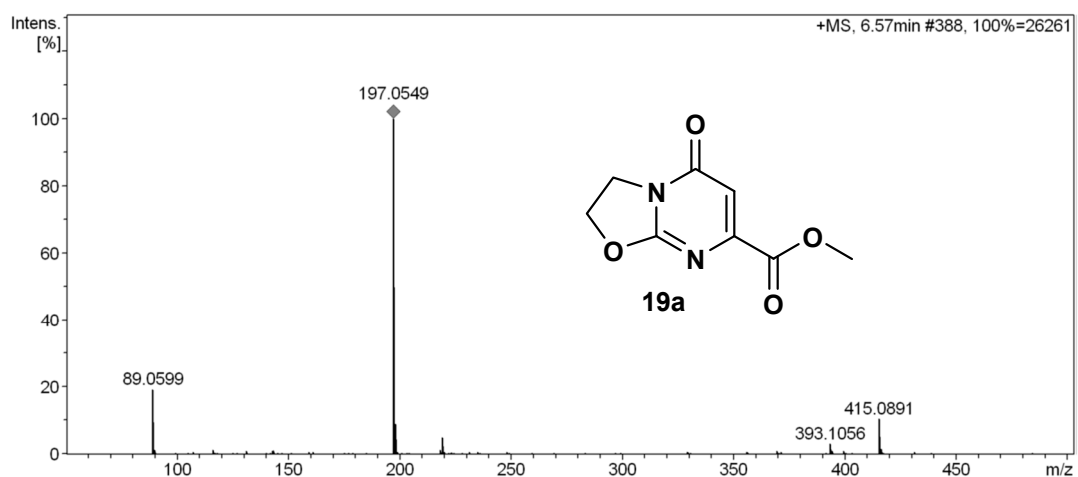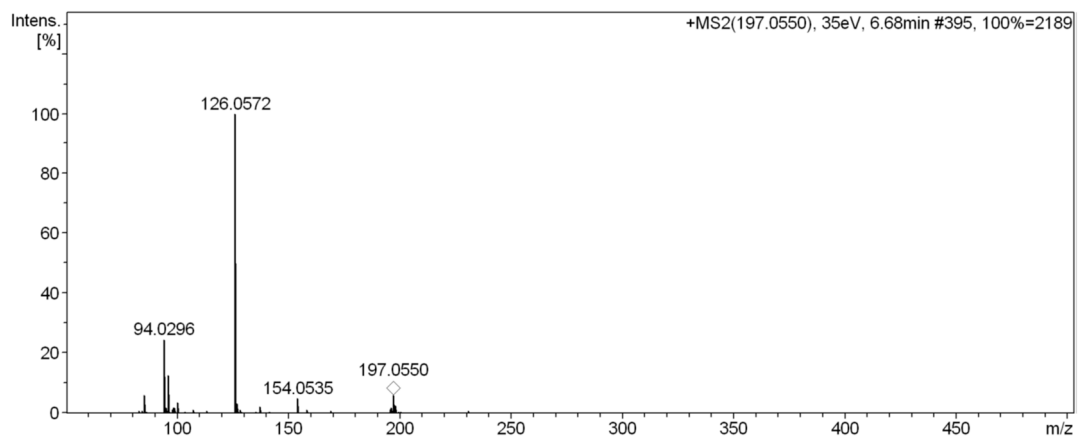

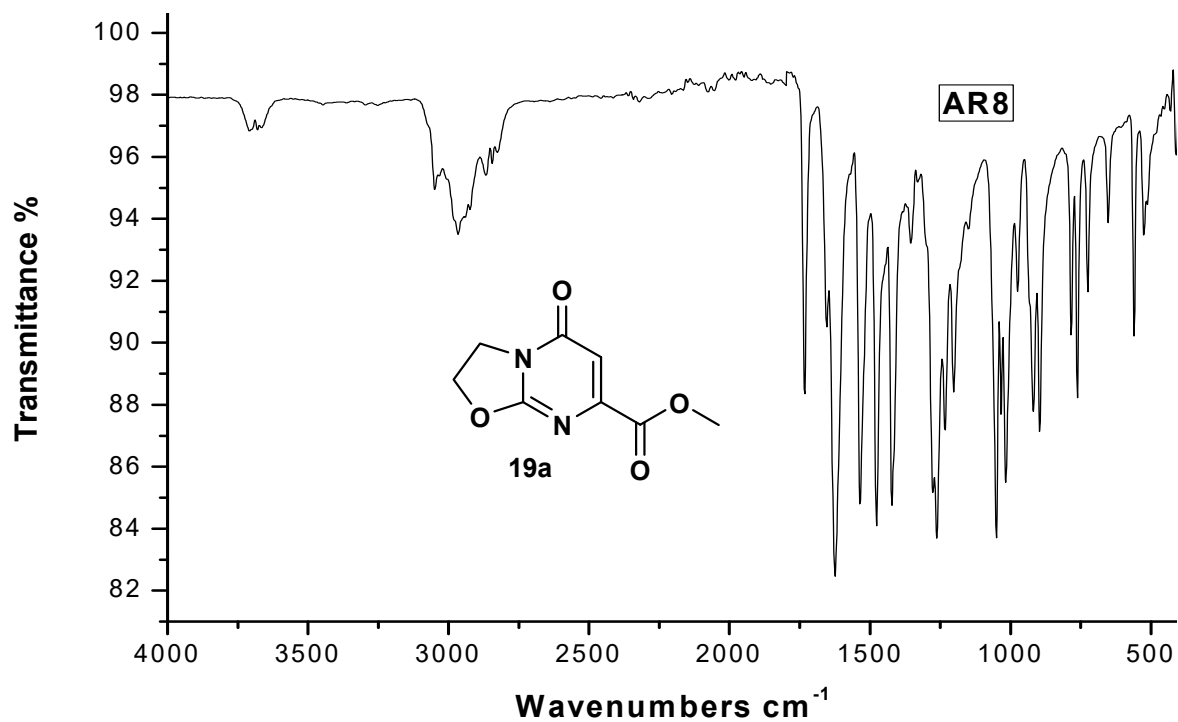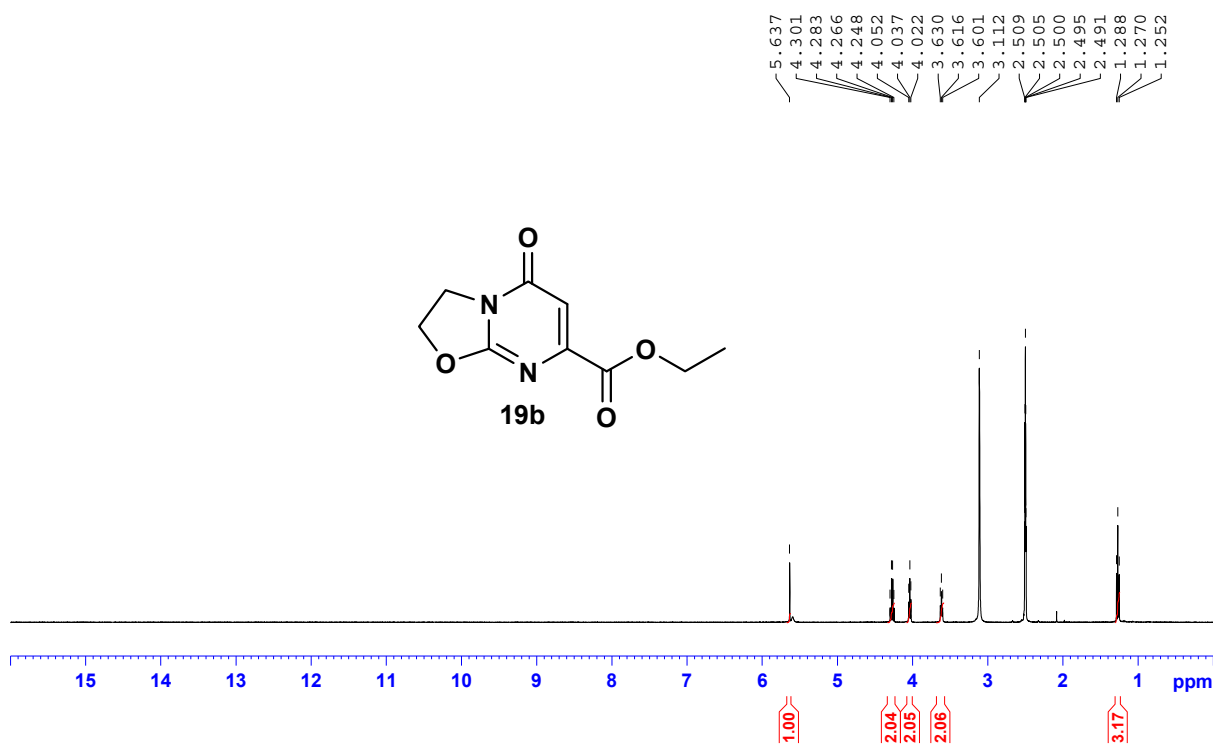

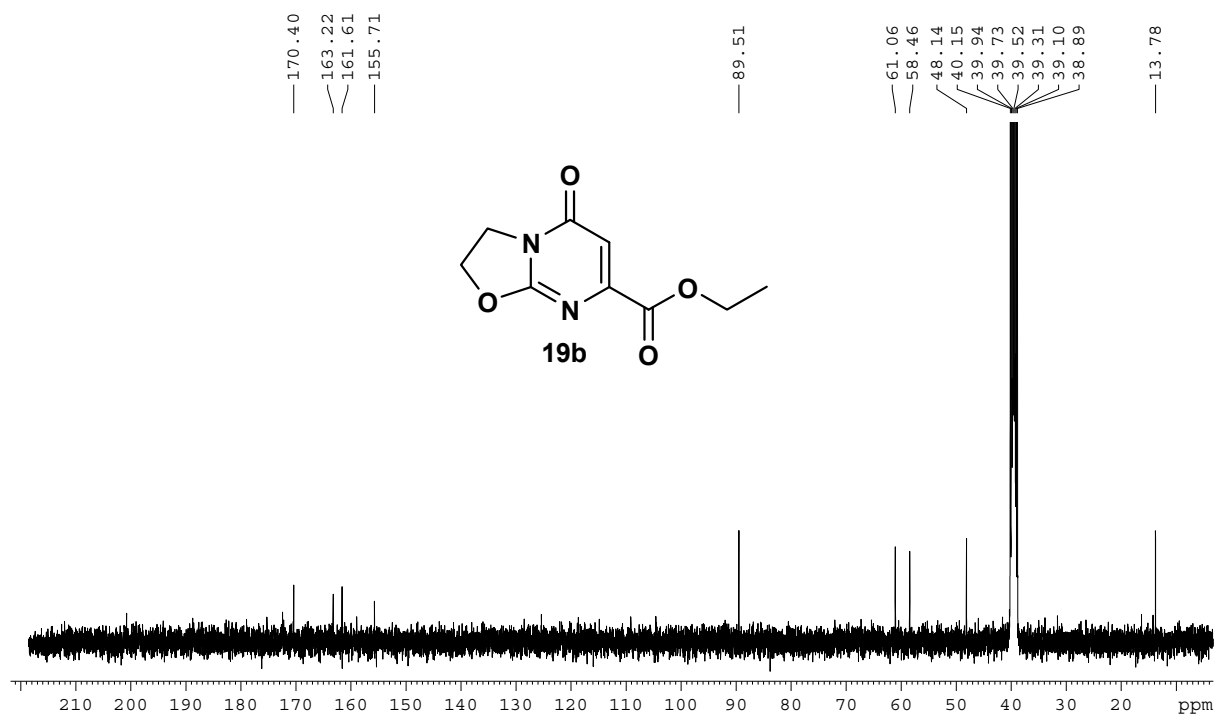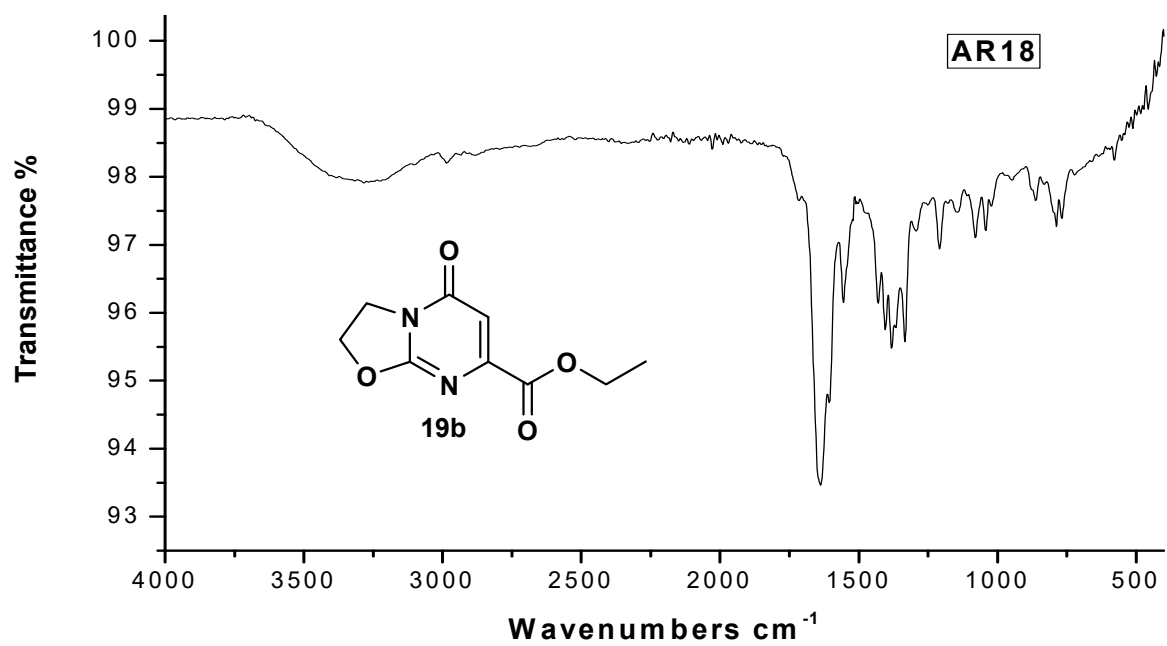

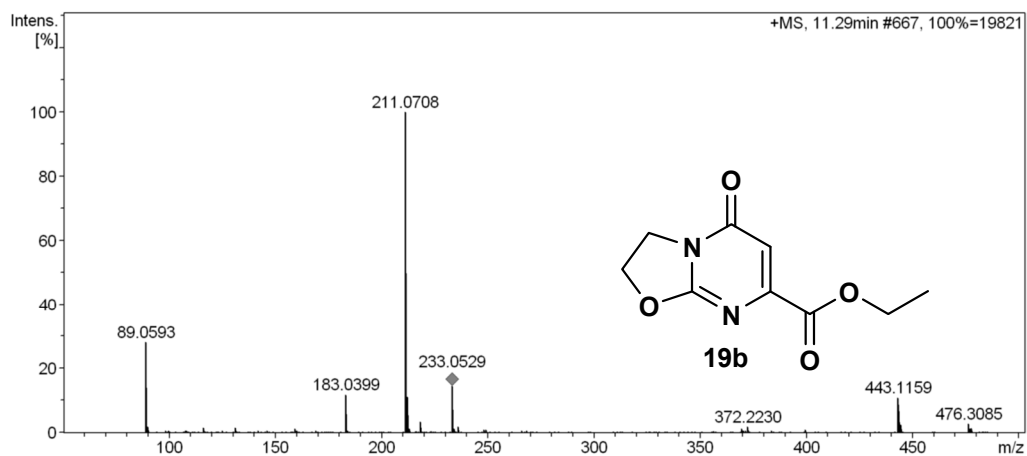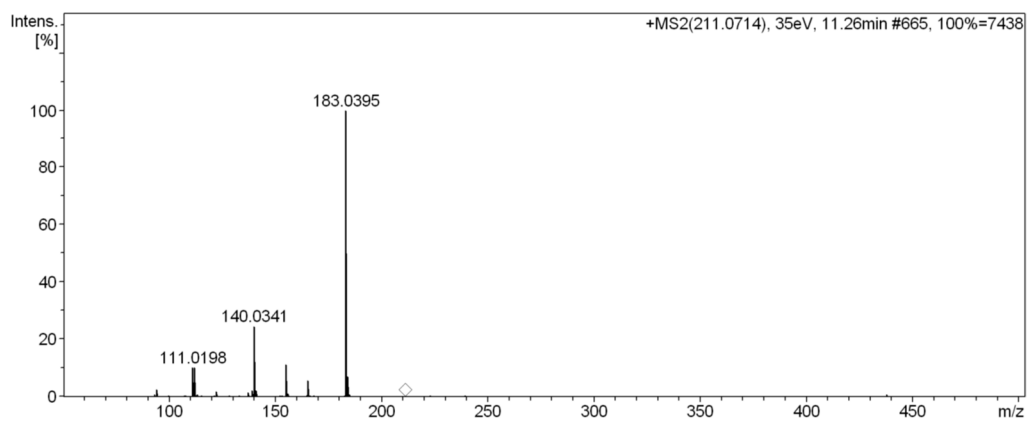

8.907

8.079

6.662

6.561

4.504

4.487

4.468

4.450

3.519

3.501

3.484

3.466

2.504

2.500

2.495

1.422

1.404

1.386

1.115

1.098

1.080

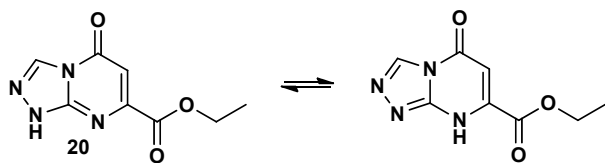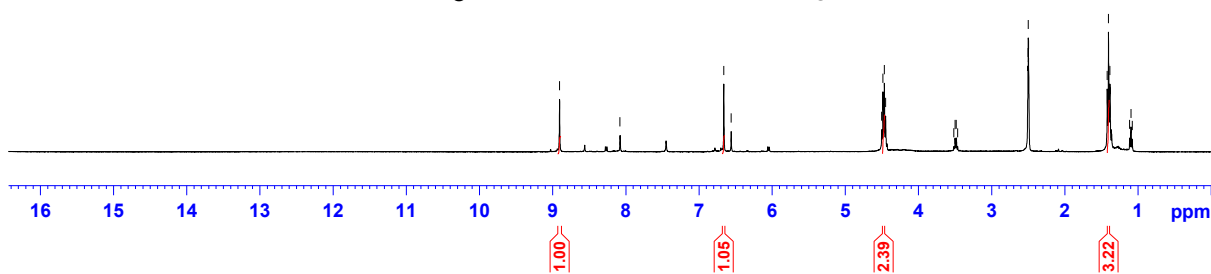

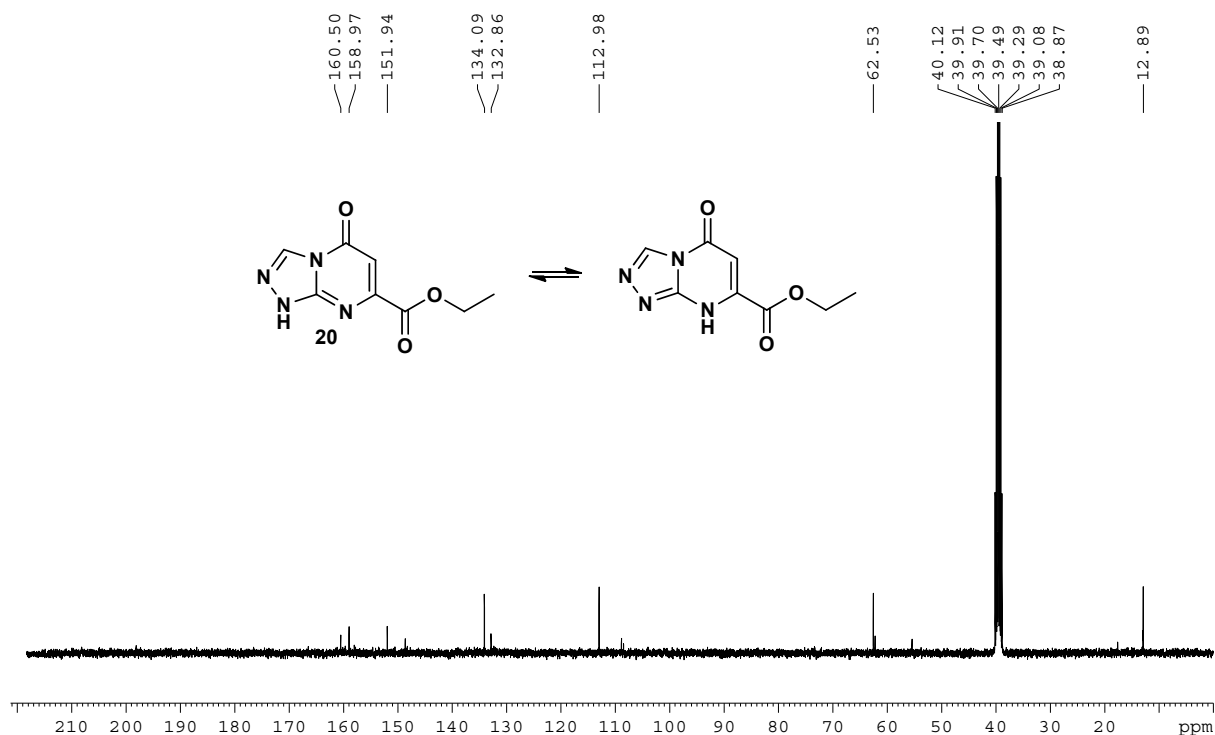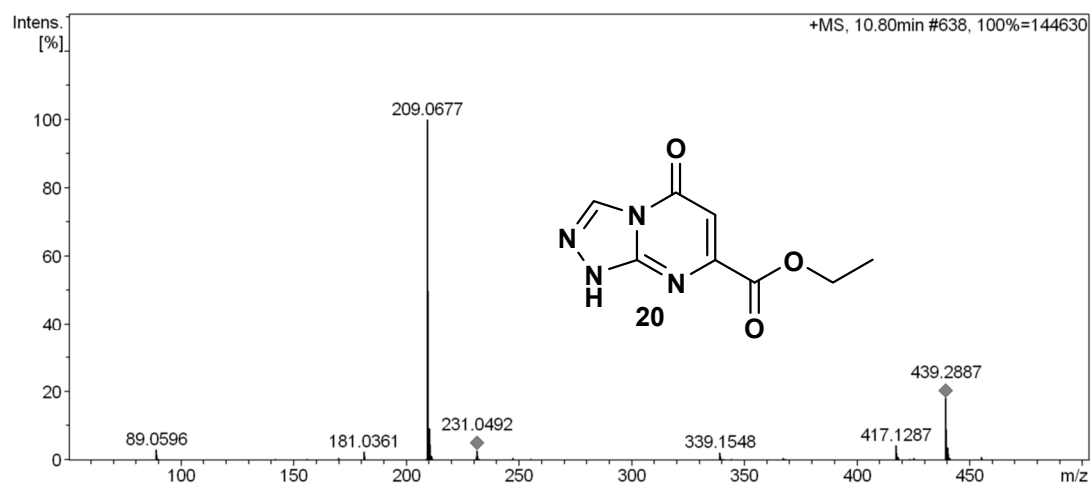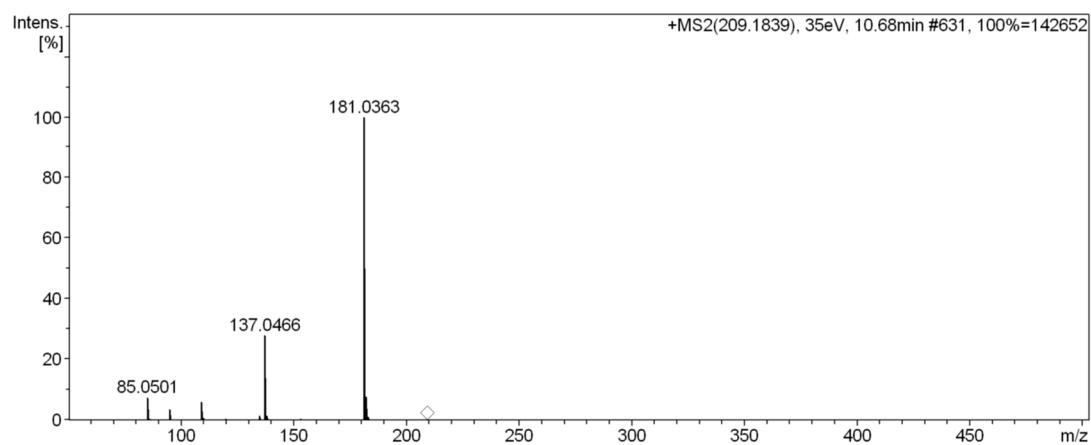

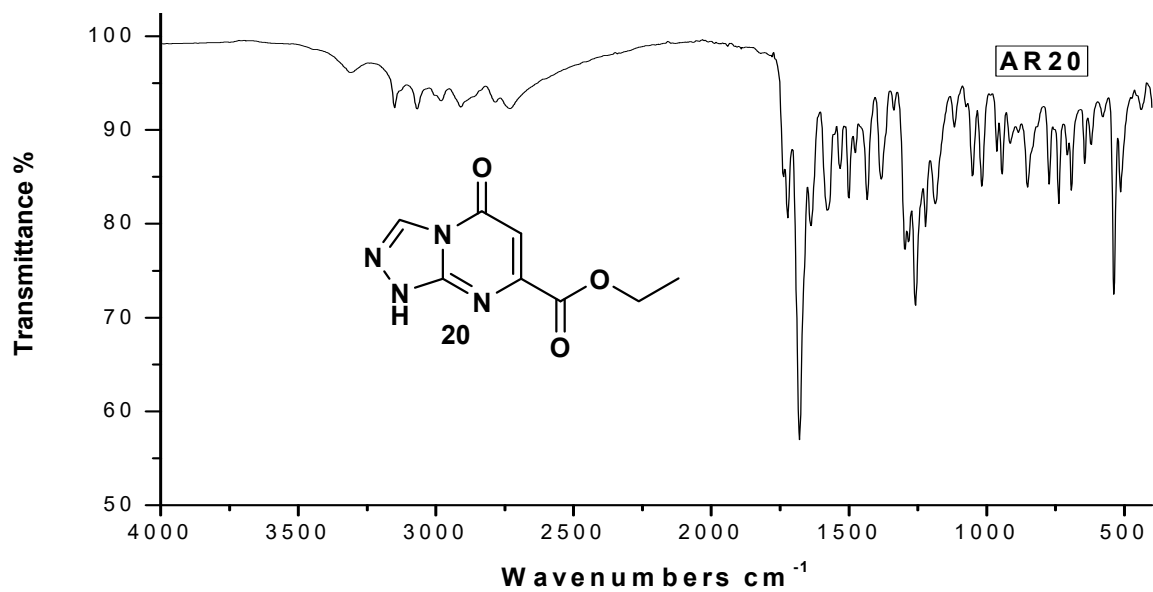

8.680

7.535

4.470

4.452

4.435

4.417

3.303

2.501

1.379

1.362

1.344

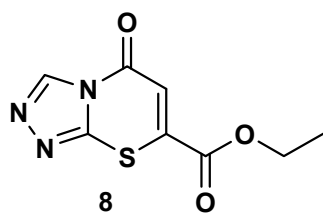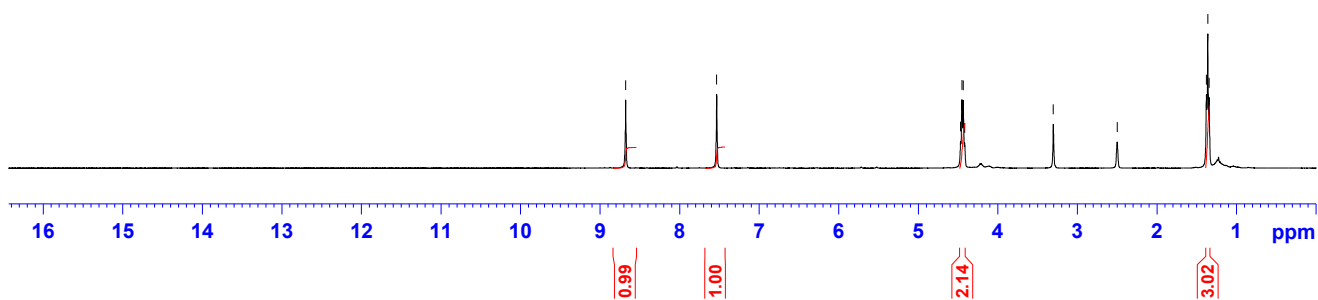

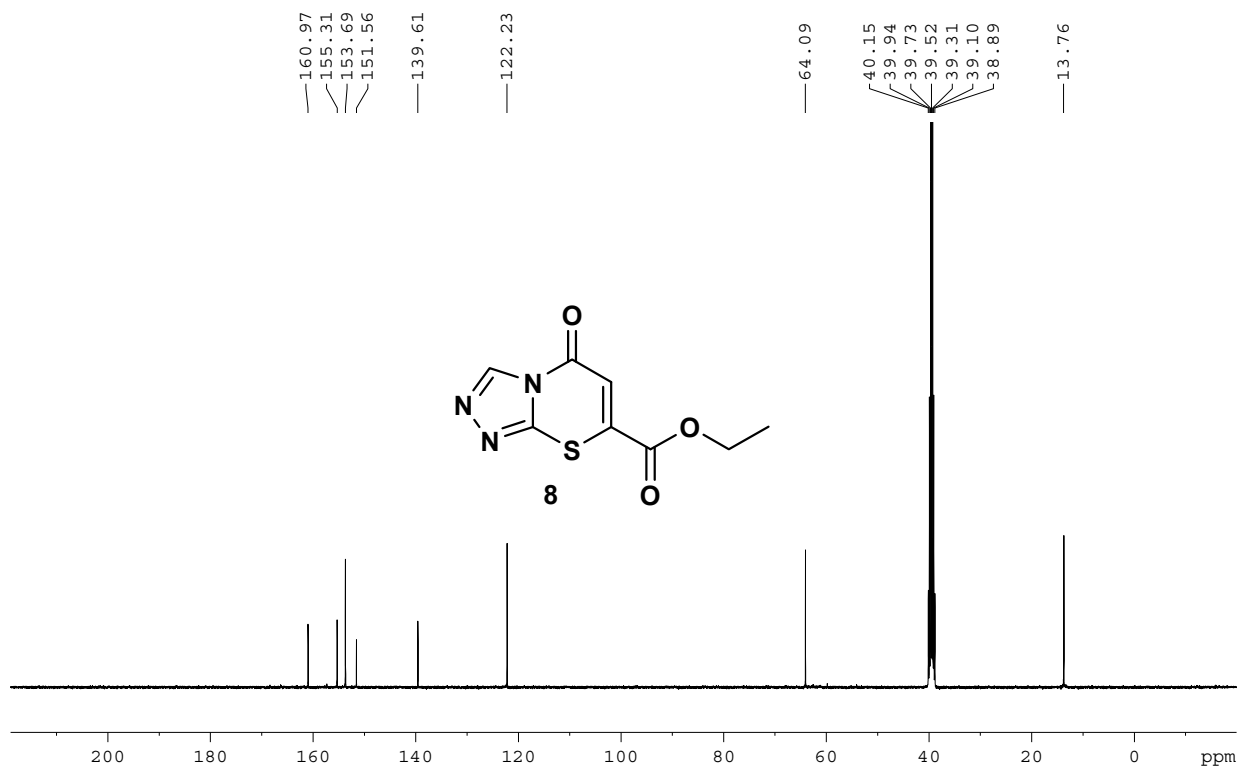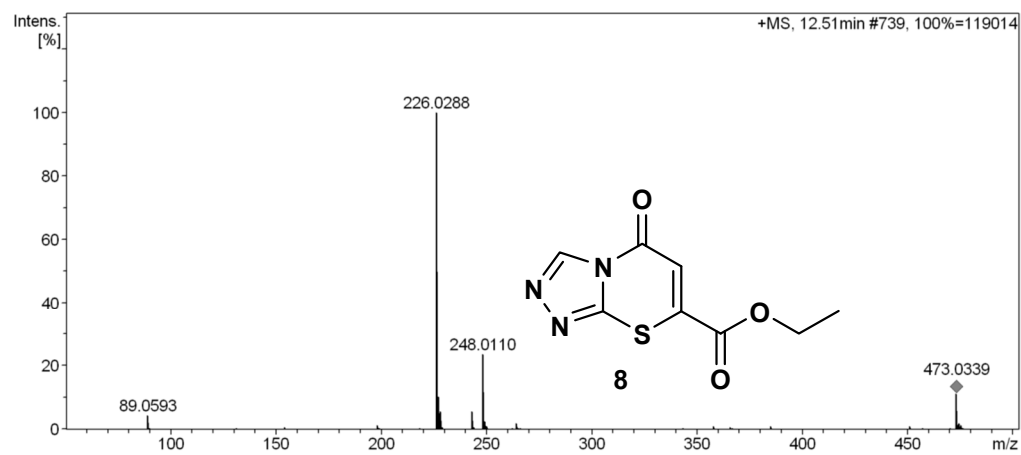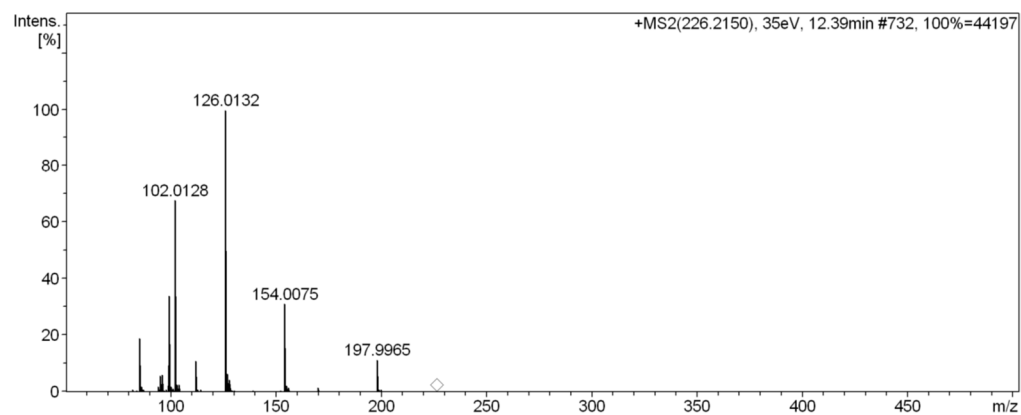



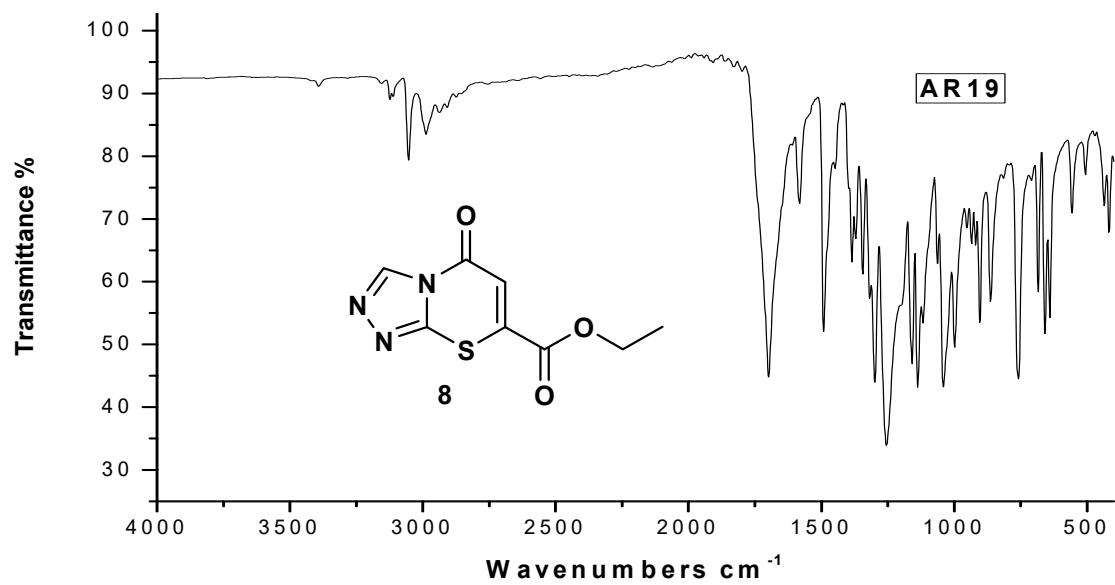

**Table S2.** Detailed mass spectrometry data of the synthesised compounds

| Compound | Chemical<br>Formula<br>[M+1]                                                 | Calculated<br>m/z | Measured<br>m/z | Mass error<br>Abs | Mass error<br>(ppm) |
|----------|------------------------------------------------------------------------------|-------------------|-----------------|-------------------|---------------------|
| 10a      | C <sub>15</sub> H <sub>20</sub> N <sub>3</sub> O <sub>5</sub> S <sup>+</sup> | 354.1118          | 354.1113        | -0.0005           | -1.411              |
| 10b      | C <sub>17</sub> H <sub>24</sub> N <sub>3</sub> O <sub>5</sub> S <sup>+</sup> | 382.1431          | 382.1439        | 0.0008            | 2.093               |
| 10c      | C <sub>16</sub> H <sub>22</sub> N <sub>3</sub> O <sub>5</sub> S <sup>+</sup> | 368.1275          | 368.1279        | 0.0004            | 1.086               |
| 10d      | C <sub>18</sub> H <sub>26</sub> N <sub>3</sub> O <sub>5</sub> S <sup>+</sup> | 396.1588          | 396.1597        | 0.0009            | 2.272               |
| 10e      | C <sub>20</sub> H <sub>30</sub> N <sub>3</sub> O <sub>5</sub> S <sup>+</sup> | 424.1901          | 424.1906        | 0.0005            | 1.179               |
| 10f      | C <sub>22</sub> H <sub>34</sub> N <sub>3</sub> O <sub>5</sub> S <sup>+</sup> | 452.2214          | 452.2223        | 0.0009            | 1.990               |
| 10g      | C <sub>18</sub> H <sub>24</sub> N <sub>3</sub> O <sub>5</sub> S <sup>+</sup> | 394.1431          | 394.1433        | 0.0002            | 0.507               |
| 10h      | C <sub>20</sub> H <sub>28</sub> N <sub>3</sub> O <sub>5</sub> S <sup>+</sup> | 422.1744          | 422.1712        | -0.0032           | -7.579              |
| 10i      | C <sub>17</sub> H <sub>24</sub> N <sub>3</sub> O <sub>5</sub> S <sup>+</sup> | 382.1430          | 382.1427        | -0.0003           | -0.785              |
| 10j      | C <sub>19</sub> H <sub>28</sub> N <sub>3</sub> O <sub>5</sub> S <sup>+</sup> | 410.1744          | 410.1749        | 0.0005            | 1.218               |
| 10k      | C <sub>21</sub> H <sub>32</sub> N <sub>3</sub> O <sub>5</sub> S              | 438.2057          | 438.2021        | -0.0036           | -8.215              |
| 10l      | C <sub>23</sub> H <sub>36</sub> N <sub>3</sub> O <sub>5</sub> S <sup>+</sup> | 466.2370          | 466.2333        | -0.0037           | -7.935              |
| 10m      | C <sub>18</sub> H <sub>26</sub> N <sub>3</sub> O <sub>5</sub> S              | 396.1588          | 396.1545        | -0.0043           | -10.854             |
| 10n      | C <sub>20</sub> H <sub>30</sub> N <sub>3</sub> O <sub>5</sub> S <sup>+</sup> | 424.1901          | 424.1873        | -0.0028           | -6.600              |
| 10o      | C <sub>22</sub> H <sub>34</sub> N <sub>3</sub> O <sub>5</sub> S <sup>+</sup> | 452.2214          | 452.2190        | 0.0024            | 1.105               |
| 10p      | C <sub>24</sub> H <sub>38</sub> N <sub>3</sub> O <sub>5</sub> S <sup>+</sup> | 480.2527          | 480.2526        | -0.0001           | -0.208              |
| 10q      | C <sub>21</sub> H <sub>24</sub> N <sub>3</sub> O <sub>5</sub> S <sup>+</sup> | 430.1431          | 430.1445        | 0.0015            | 3.254               |
| 10r      | C <sub>23</sub> H <sub>28</sub> N <sub>3</sub> O <sub>5</sub> S <sup>+</sup> | 458.1744          | 458.1744        | 0.0000            | 0.000               |
| 10s      | C <sub>25</sub> H <sub>32</sub> N <sub>3</sub> O <sub>5</sub> S <sup>+</sup> | 486.2057          | 486.2044        | -0.0013           | -2.673              |

|            |                           |          |           |         |        |
|------------|---------------------------|----------|-----------|---------|--------|
| <b>10t</b> | $C_{27}H_{36}N_3O_5S^+$   | 514.2370 | 514.2350  | -0.0020 | -3.889 |
| <b>10u</b> | $C_{23}H_{26}N_3O_5S^+$   | 456.1588 | 456.1592  | 0.0004  | 0.876  |
| <b>13a</b> | $C_{10}H_{11}N_2O_3S^+$   | 239.0485 | 239.0486  | 0.0001  | 0.418  |
| <b>13b</b> | $C_{15}H_{13}N_2O_3S^+$   | 301.0641 | 301.0648. | 0.0007  | 2.325  |
| <b>13c</b> | $C_{14}H_{10}FN_2O_3S^+$  | 305.0391 | 305.0391  | 0.0000  | 0.000  |
| <b>13d</b> | $C_{14}H_{10}ClN_2O_3S^+$ | 321.0095 | 321.0087  | -0.0008 | -2.492 |
| <b>13e</b> | $C_9H_9N_2O_3S^+ +$       | 225.0328 | 225.0339  | 0.0011  | 4.888  |
| <b>13f</b> | $C_{10}H_{11}N_2O_3S^+$   | 239.0485 | 239.0497  | 0.0012  | 5.019  |
| <b>13g</b> | $C_{11}H_{13}N_2O_3S^+$   | 253.0641 | 253.0652  | 0.0011  | 4.346  |
| <b>13h</b> | $C_{15}H_{12}FN_2O_3S^+$  | 319.0547 | 319.0565. | 0.0018  | 5.641  |
| <b>13i</b> | $C_{15}H_{12}ClN_2O_3S^+$ | 335.0252 | 335.0267  | 0.0015  | 4.477  |
| <b>13j</b> | $C_{11}H_{13}N_2O_3S^+$   | 253.0641 | 253.0642  | 0.0001  | 0.395  |
| <b>19a</b> | $C_8H_9N_2O_4^+$          | 197.0557 | 197.0549  | -0.0008 | -4.059 |
| <b>19b</b> | $C_9H_{11}N_2O_4^+$       | 211.0713 | 211.0708  | -0.0005 | -2.368 |
| <b>20</b>  | $C_8H_9N_4O_3^+$          | 209.0669 | 209.0677  | 0.0008  | 3.826  |
| <b>5</b>   | $C_8H_8N_3O_3S^+$         | 226.0281 | 226.0288. | 0.0007  | 3.096  |

## References

1. Oda, T., Watanabe, S.; Nakamura, T. Type C virus particles produced in human T-cell lines derived from acute lymphoblastic leukemia and a leukemic T-lymphoid malignancy, *Acta Med Okayama.*, 1983, 37, 529-33.
2. Varghese, E.; Büsselberg, D. Auranofin, an Anti-Rheumatic Gold Compound, Modulates Apoptosis by Elevating the Intracellular Calcium Concentration ( $[Ca^{2+}]_i$ ) in MCF-7 Breast Cancer Cells, *Cancers*, 2014, 6, 2243-2258.
3. Folks T.M., Clouse K.A., Justement J., Rabsonf A., Duho E., Kehrl J.H., Fauci A.S., *Proc. Natl Acad. Sci. USA*, 1989, 86, 2365-2368; doi:10.1073/pnas.86.7.2365.
4. Rosenwirth B., Billich A., Datema R., Donatsch P., Hammerschmid F., Harrison R., Hiestand P., Jaksche H., Mayer P., Peichl P., Quesniaux V., Schatz F., Schuurman H.-J., Traber R., Wenger R., Wolff B., Zenke G, Zurini M., *Antimicrob. Agents Chemother.*, 1994, 38, 1763-72; doi: 10.1128/aac.38.8.1763.
